# Supplementary material for: European guidelines on microscopic colitis: United European Gastroenterology and European Microscopic Colitis Group statements and recommendations
Source: PubMed Central journal article supplement — United European Gastroenterol J. 2021 Feb 22;9(1):13–37. doi: 10.1177/2050640620951905 (PMC8259259; doi:10.1177/2050640620951905), 2021-02-22

## Supplementary material – Appendix A

Literature search and flow chart for the process of identifying studies included in and excluded from the systematic review (PRISMA)

### Workgroup 1:

#### PICO 01: What is the incidence of MC?

Combined search in Pubmed and EMBASE data base (using MeSH Terms and correspondent Emtree terms): (((chronic diarrhea) OR prevalence) OR incidence) OR epidemiology[MeSH Terms])) AND (((microscopic colitis[MeSH Terms]) OR lymphocytic colitis) OR collagenous colitis) OR incomplete microscopic colitis). Filter activated: Humans.

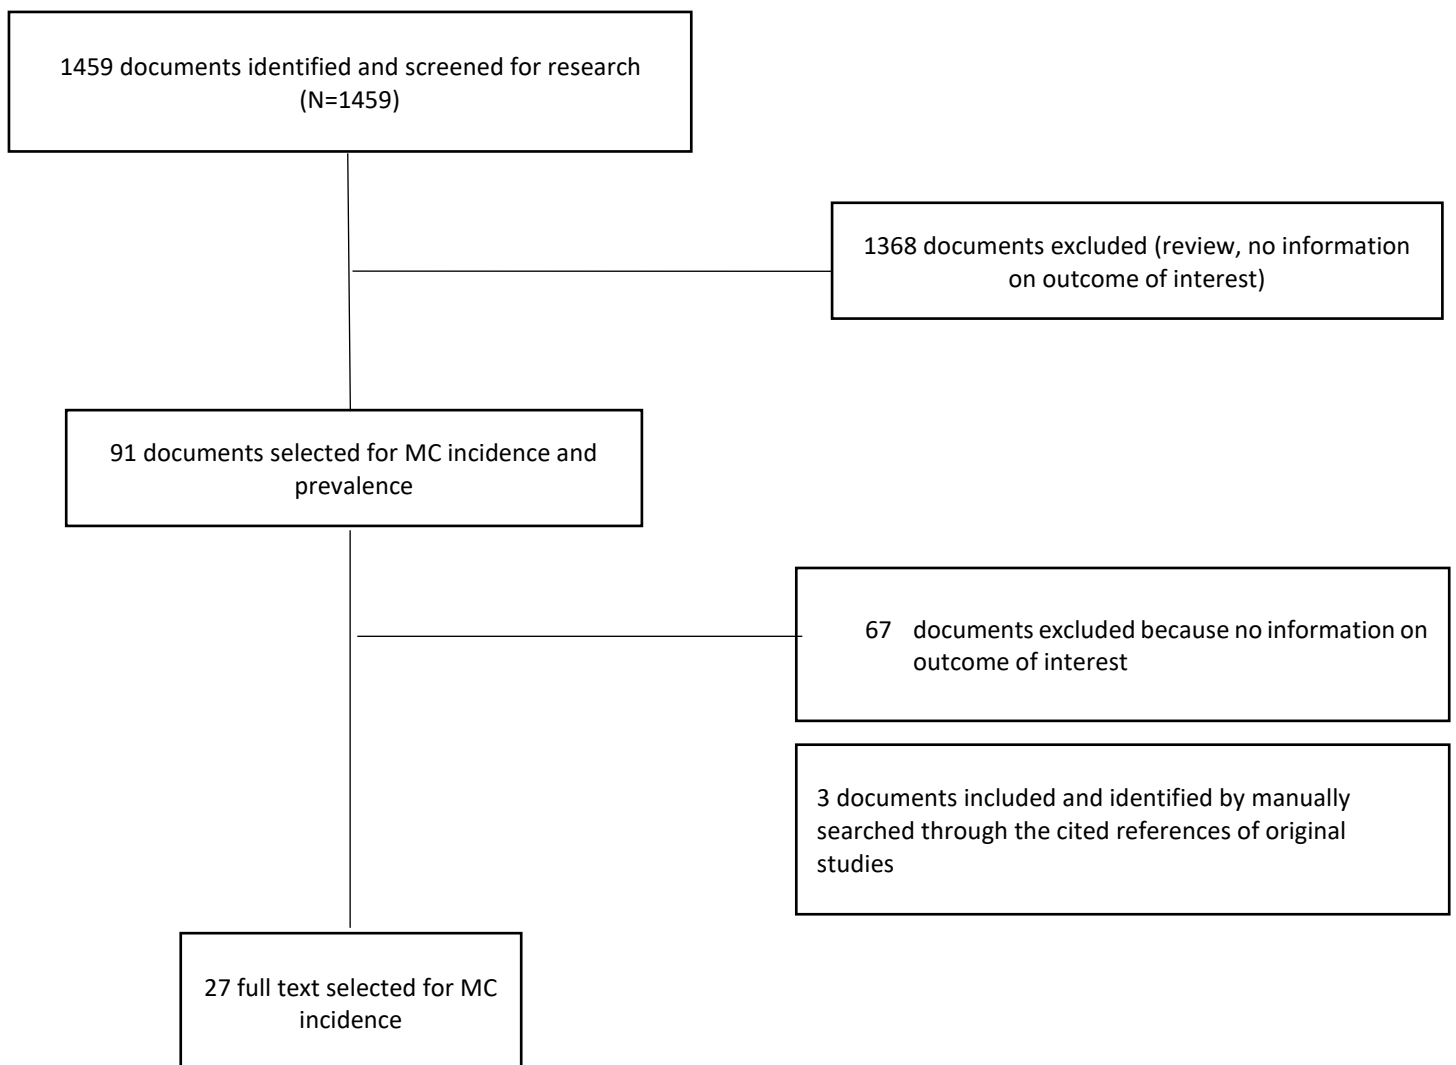

**PICO 02: What is the prevalence of MC?**

Combined search in Pubmed and EMBASE data base (using MeSH Terms and correspondent Emtree terms): (((chronic diarrhea) OR prevalence) OR incidence) OR epidemiology[MeSH Terms])) AND (((microscopic colitis[MeSH Terms]) OR lymphocytic colitis) OR collagenous colitis) OR incomplete microscopic colitis). Filter activated: Humans

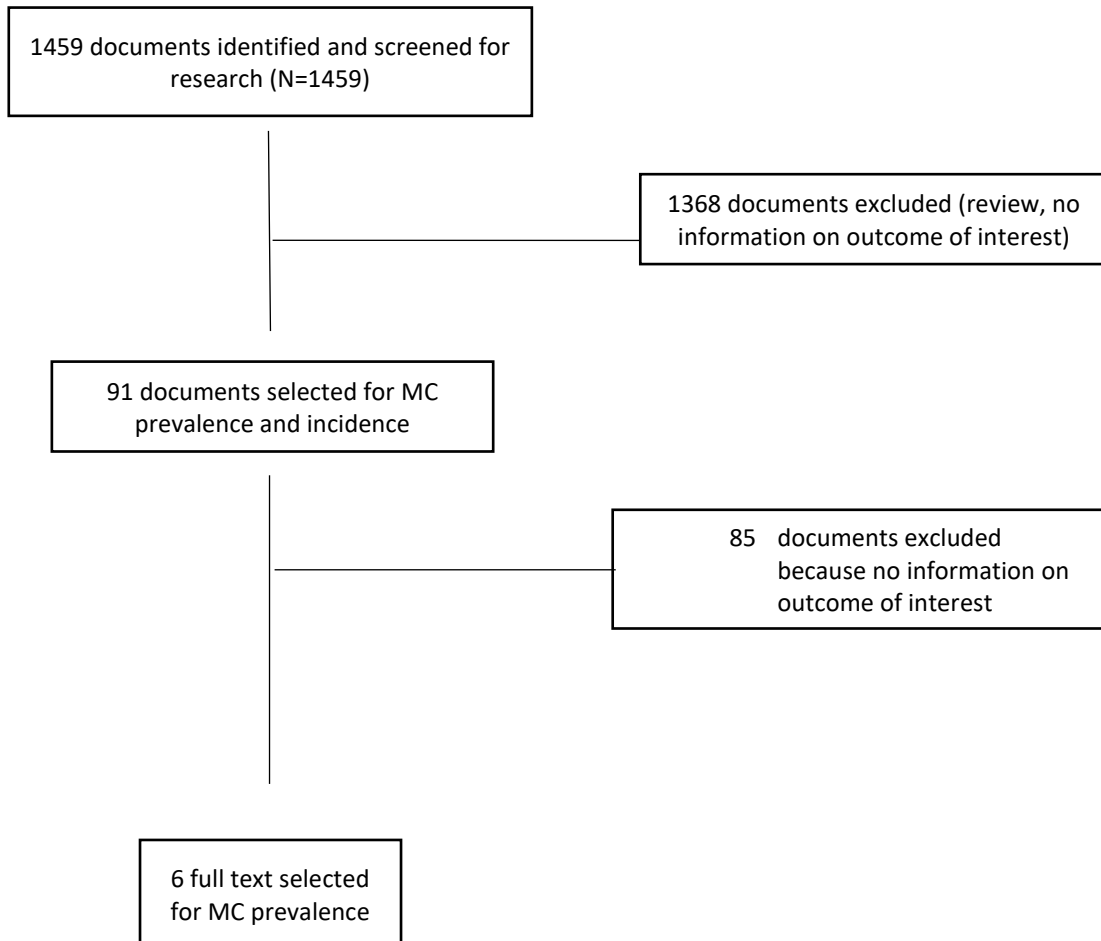

**PICO 03: How frequent is MC in patients with chronic diarrhea and normal or near normal colonoscopy?**

Combined search in Pubmed and Embase data base (using MeSH Terms and correspondent Emtree terms): (((chronic diarrhea) OR prevalence) OR incidence) OR epidemiology[MeSH Terms])) AND (((microscopic colitis[MeSH Terms]) OR lymphocytic colitis) OR collagenous colitis) OR incomplete microscopic colitis). Filter activated: Humans.

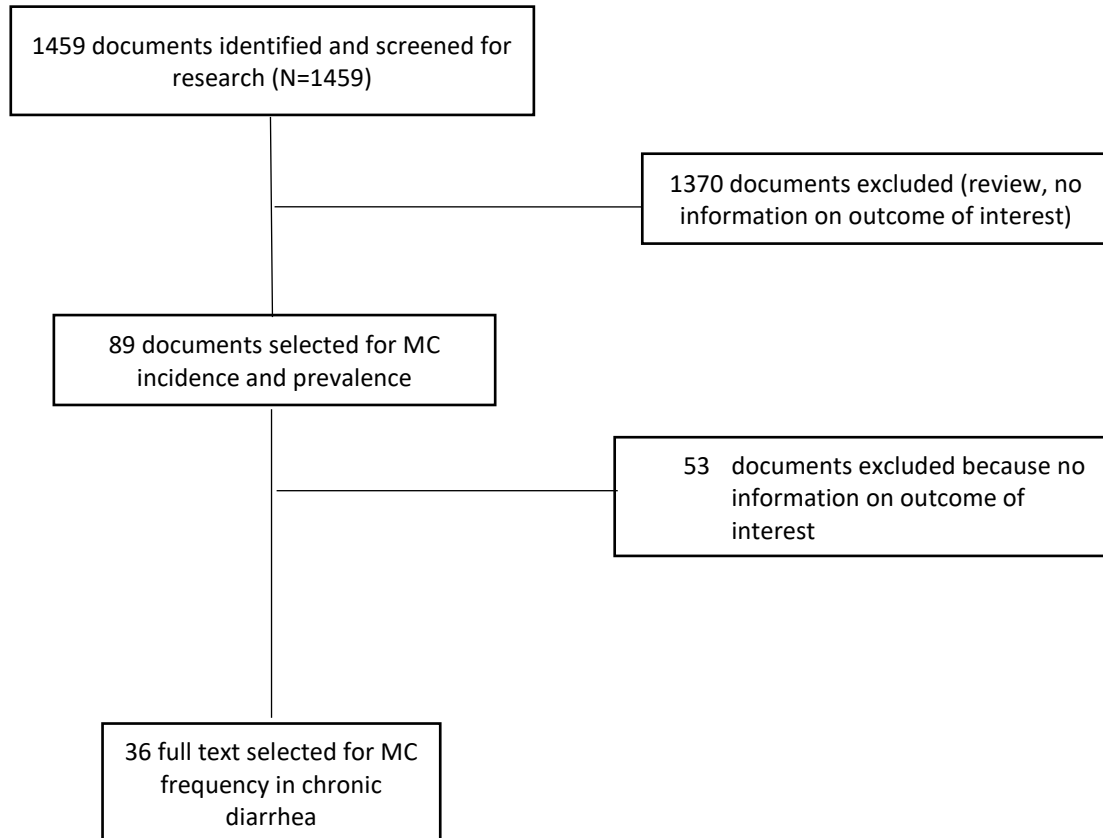

#### PICO 04: Is smoking a risk factors for MC?

Combined search in Pubmed and EMBASE data base (using MeSH Terms and correspondent Emtree terms):  
(((smoking) OR tobacco) OR risk factors[MeSH Terms])) AND (((microscopic colitis[MeSH Terms]) OR  
lymphocytic colitis) OR collagenous colitis) OR incomplete microscopic colitis). Filter activated: Humans.

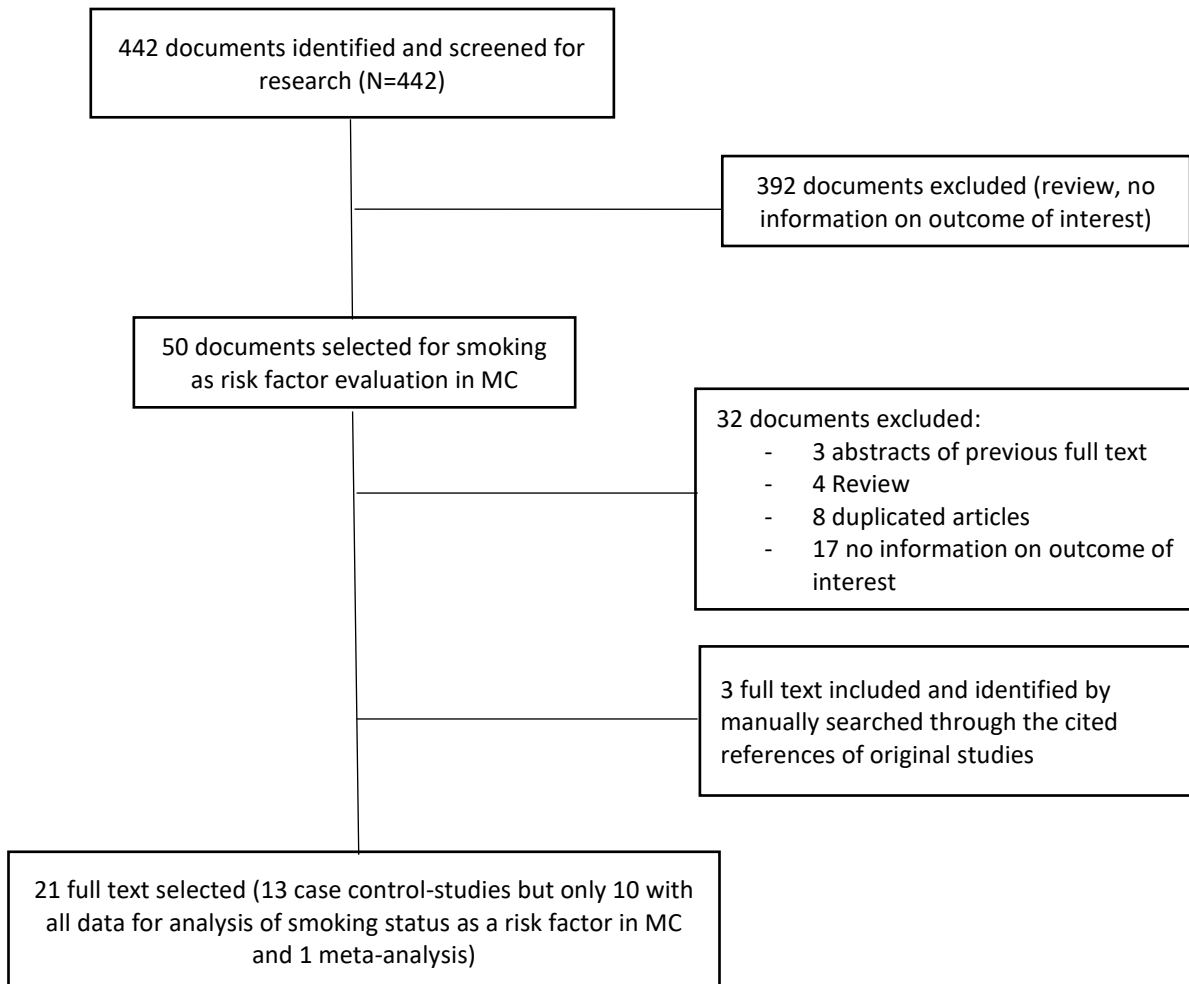

**PICO 05: Is female gender a risk factor for MC?**

Combined search in Pubmed and EMBASE data base (using MeSH Terms and correspondent Emtree terms): (((chronic diarrhea) OR prevalence) OR incidence) OR epidemiology[MeSH Terms])) AND (((microscopic colitis[MeSH Terms]) OR lymphocytic colitis) OR collagenous colitis) OR incomplete microscopic colitis). Filter activated: Humans.

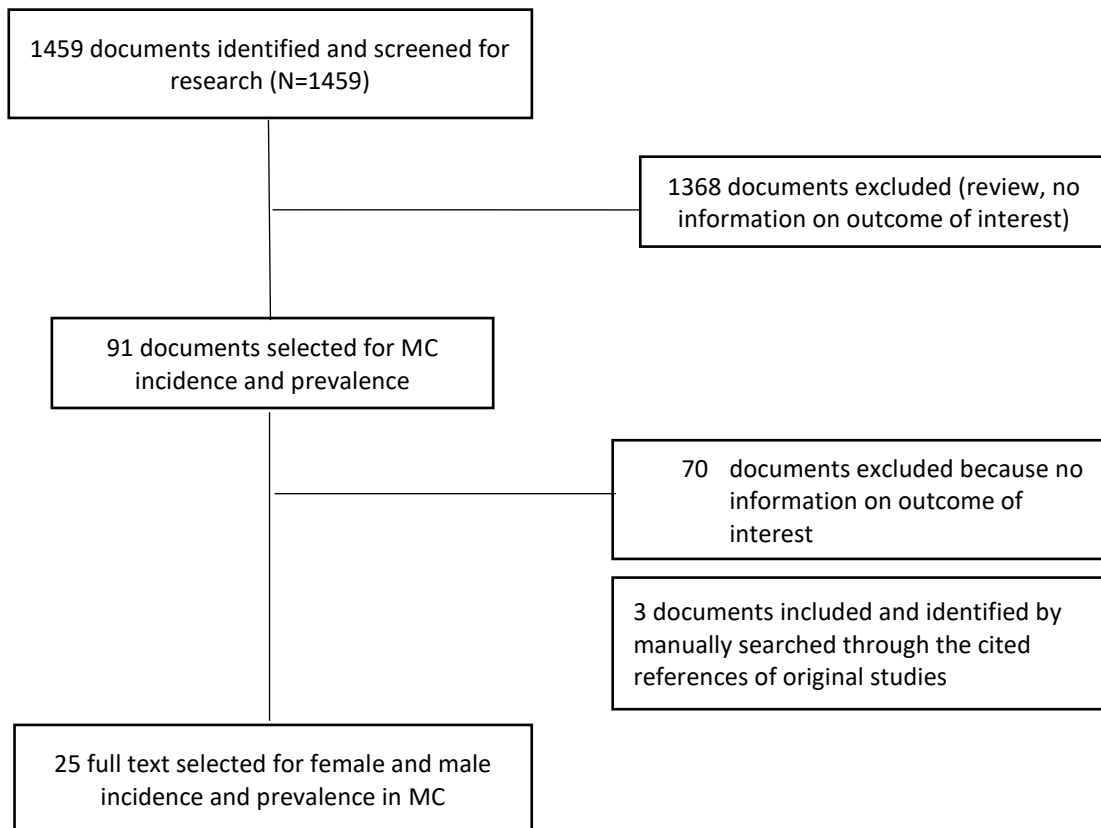

**PICO 06: In MC patients does smoking cessation influence the disease course?**

Combined search in Pubmed and EMBASE data base (using MeSH Terms and correspondent Emtree terms): ((smoking) OR tobacco) OR risk factors[MeSH Terms])) AND (((microscopic colitis[MeSH Terms]) OR lymphocytic colitis) OR collagenous colitis) OR incomplete microscopic colitis). Filter activated: Humans.

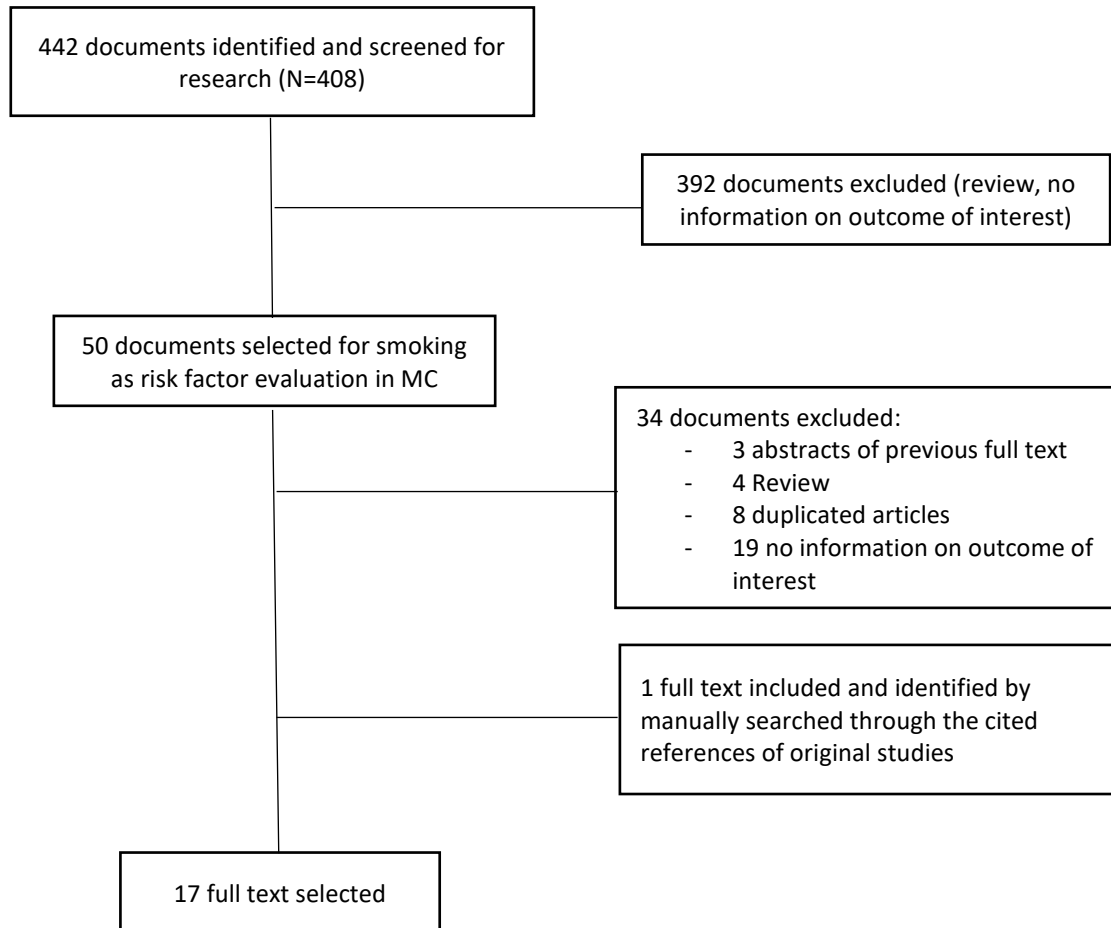

**PICO 07: Is drug use associated with a significant increased risk of MC?**

Combined search in Pubmed and EMBASE data base (using MeSH Terms and correspondent Emtree terms): (((chronic diarrhea) OR prevalence) OR incidence) OR epidemiology[MeSH Terms])) AND (((microscopic colitis[MeSH Terms]) OR lymphocytic colitis) OR collagenous colitis) OR incomplete microscopic colitis). Filter activated: Humans.

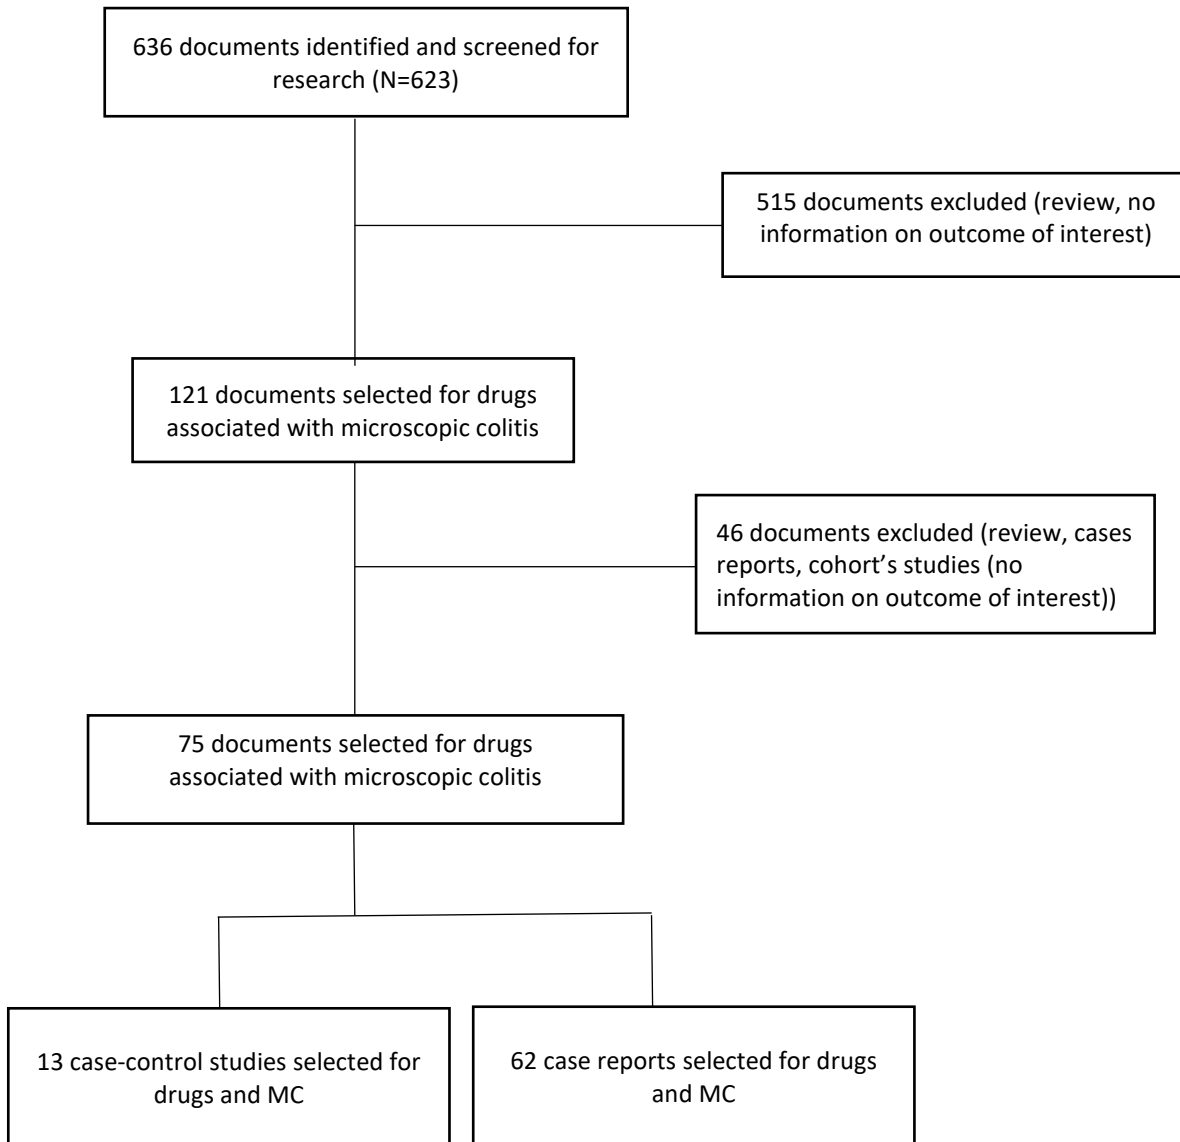

**PICO 08: In MC patients does imputable drug withdrawal influence the disease course?**

Combined search in Pubmed and EMBASE data base (using MeSH Terms and correspondent Emtree terms): (((chronic diarrhea) OR prevalence) OR incidence) OR epidemiology[MeSH Terms])) AND (((microscopic colitis[MeSH Terms]) OR lymphocytic colitis) OR collagenous colitis) OR incomplete microscopic colitis). Filter activated: Humans.

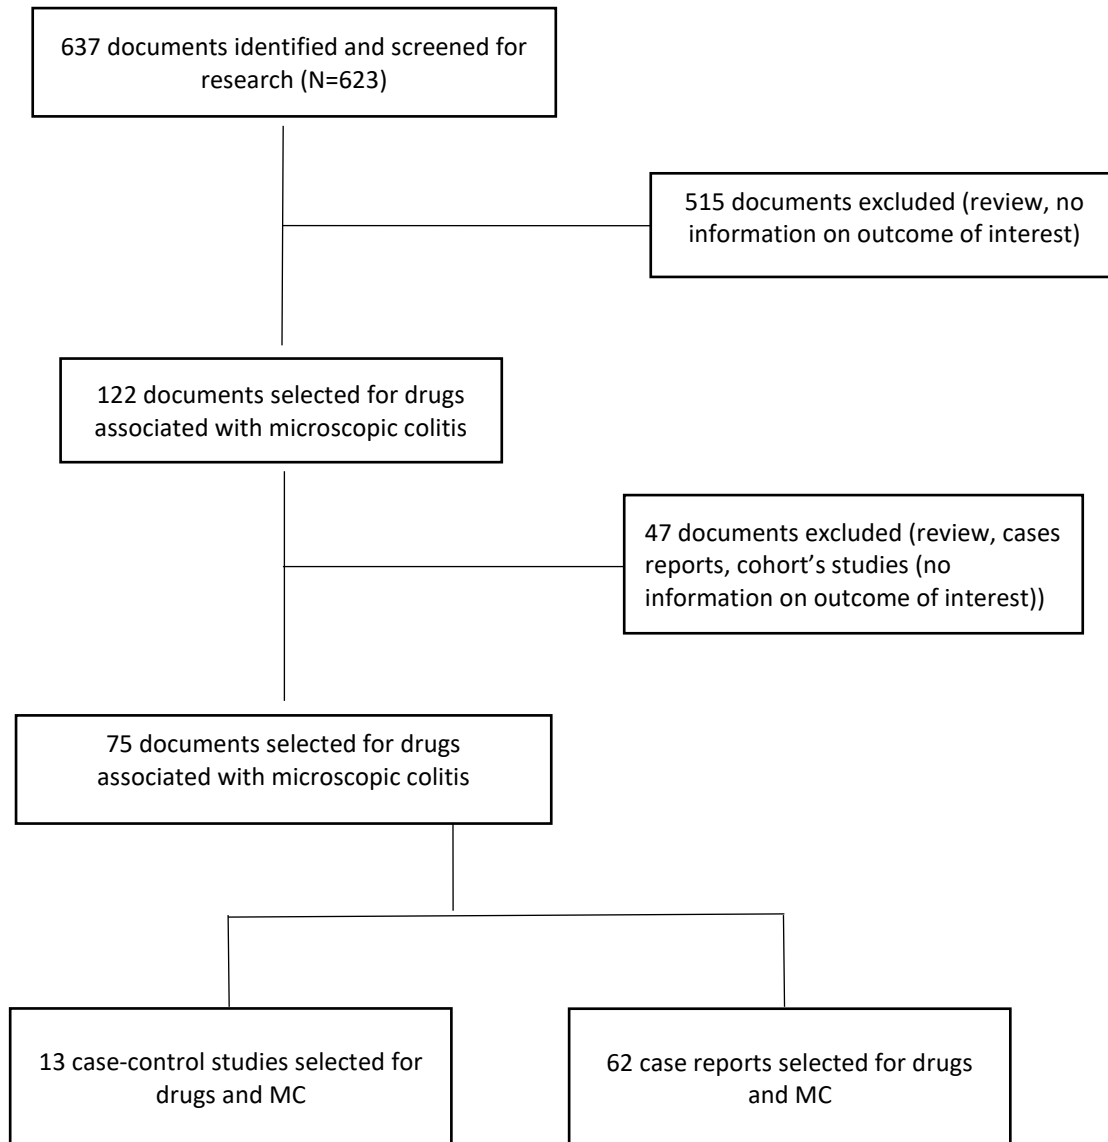



**PICO 09: Should MC patients require a special program for colonoscopy surveillance to rule out CRC compared to general population?**

Combined search in Pubmed and EMBASE data base (using MeSH Terms and correspondent Emtree terms): (((colonic polyp) OR colonic adenoma) OR colorectal neoplasia [MeSH Terms])) AND (((microscopic colitis [MeSH Terms]) OR lymphocytic colitis) OR collagenous colitis) OR incomplete microscopic colitis). Filter activated: Humans.

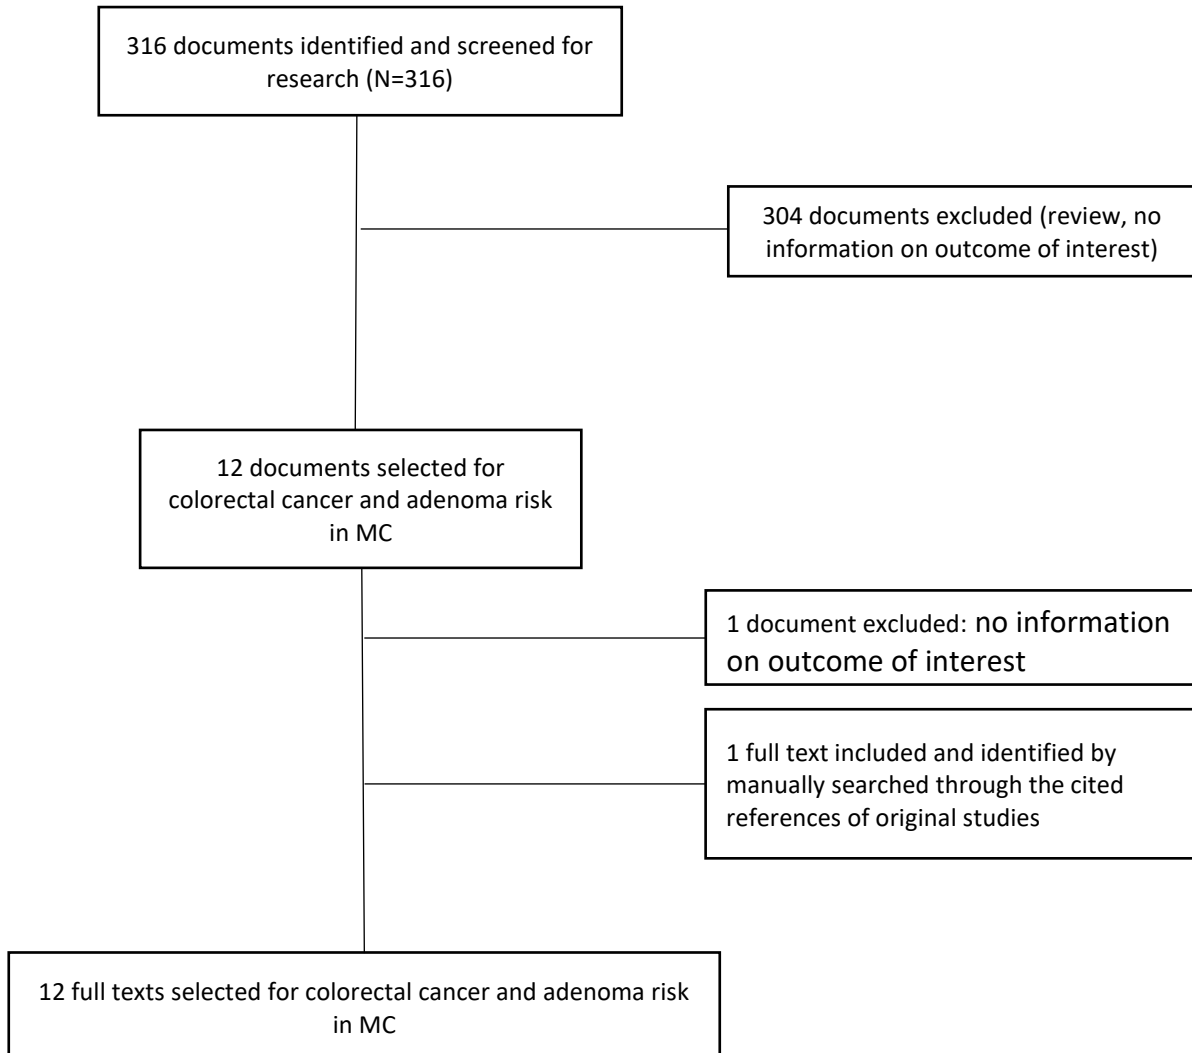

**Workgroup 3:**

**PICO 01: What are the symptoms of MC?**

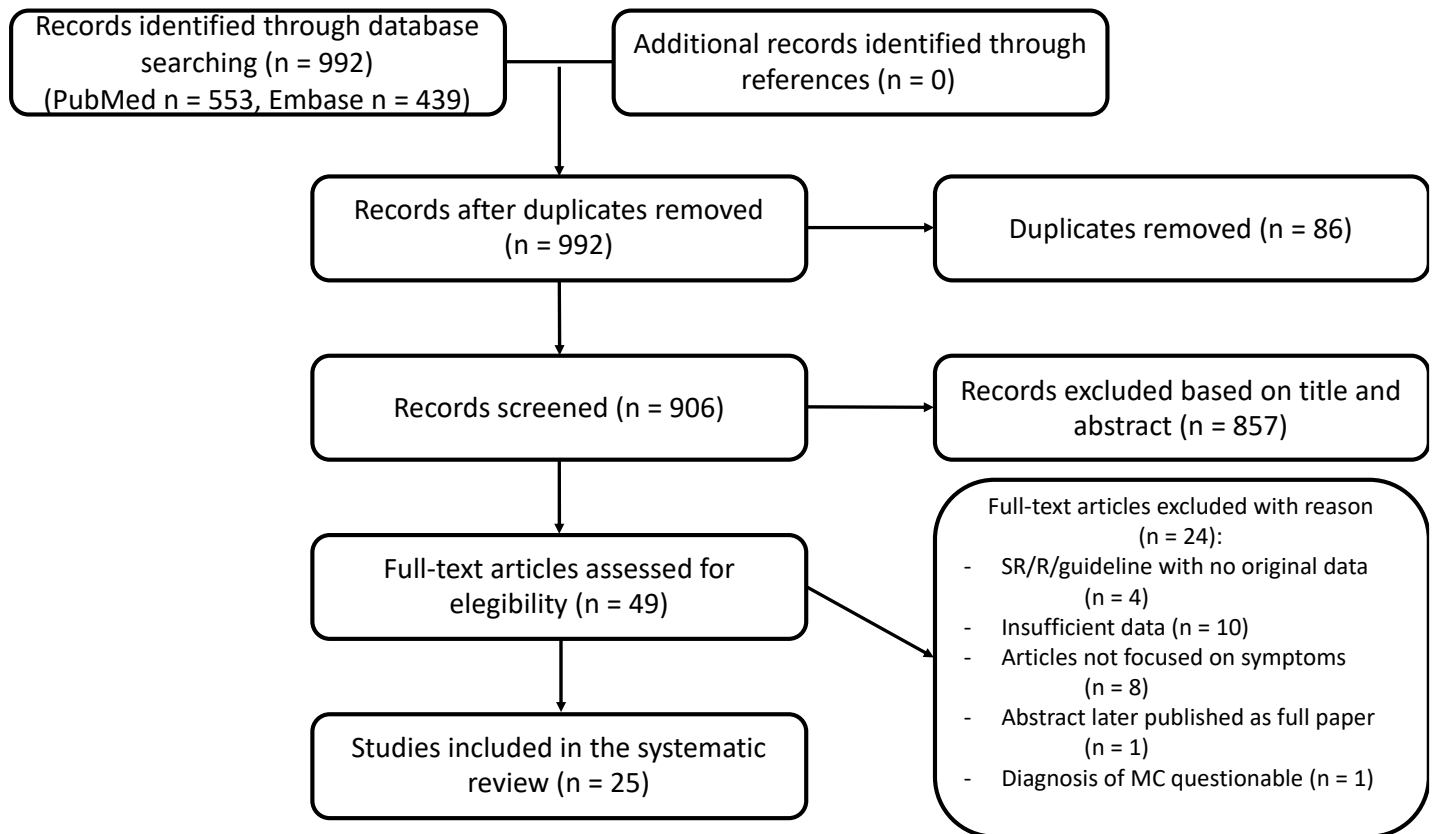

**PICO 02: Can MC be distinguished from IBS-D based on symptoms?**

Combined search in Pubmed and EMBASE data base (using MeSH Terms and correspondent Emtree terms): ((Microscopic colitis) OR (microscopic colitides) OR (collagenous colitis) OR (lymphocytic colitis) AND (Rome) OR (Roma) OR (Manning) OR (Kruis) OR (irritable bowel syndrome) OR (functional diarrhea) OR (functional diarrhea) OR (functional disease) OR (functional disorders)) AND ((epidemiology) OR (prevalence) OR (proportion) OR (frequency) OR (incidence) OR (demography)).

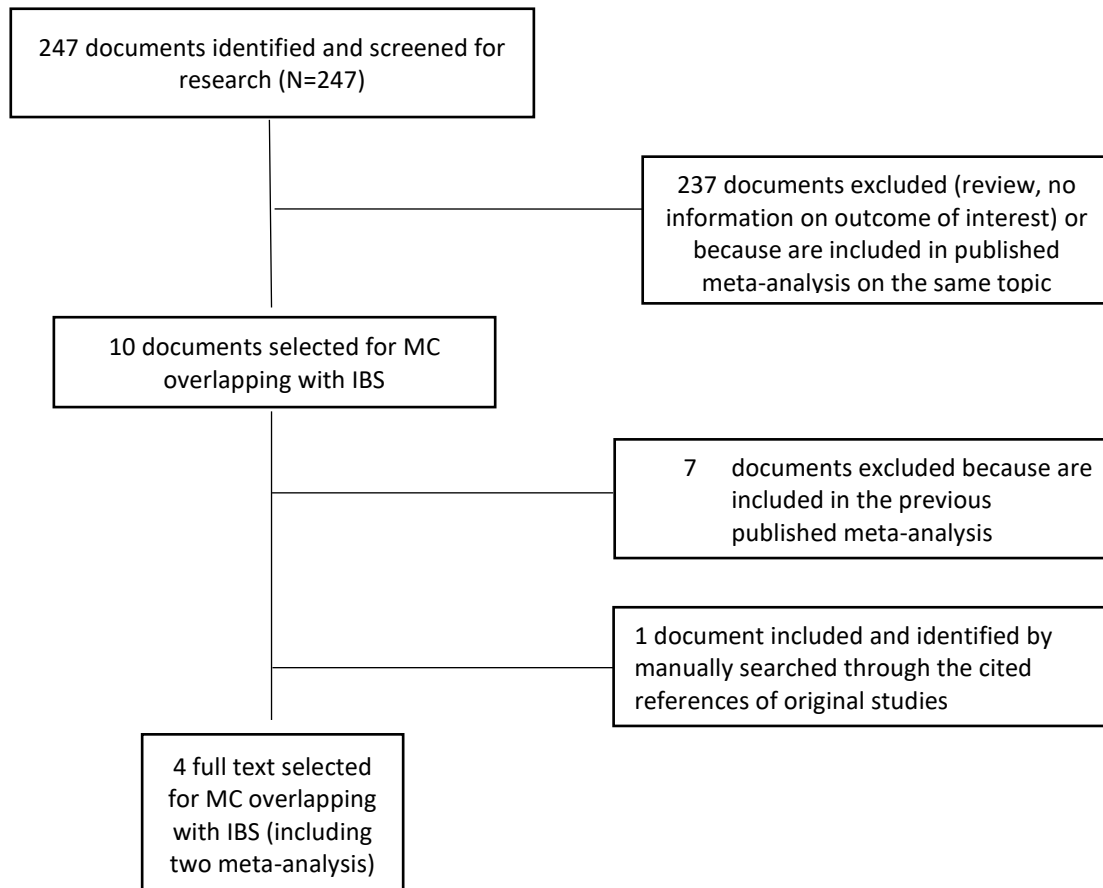

**PICO 03: Is the patient health-related quality of life affected by MC?**

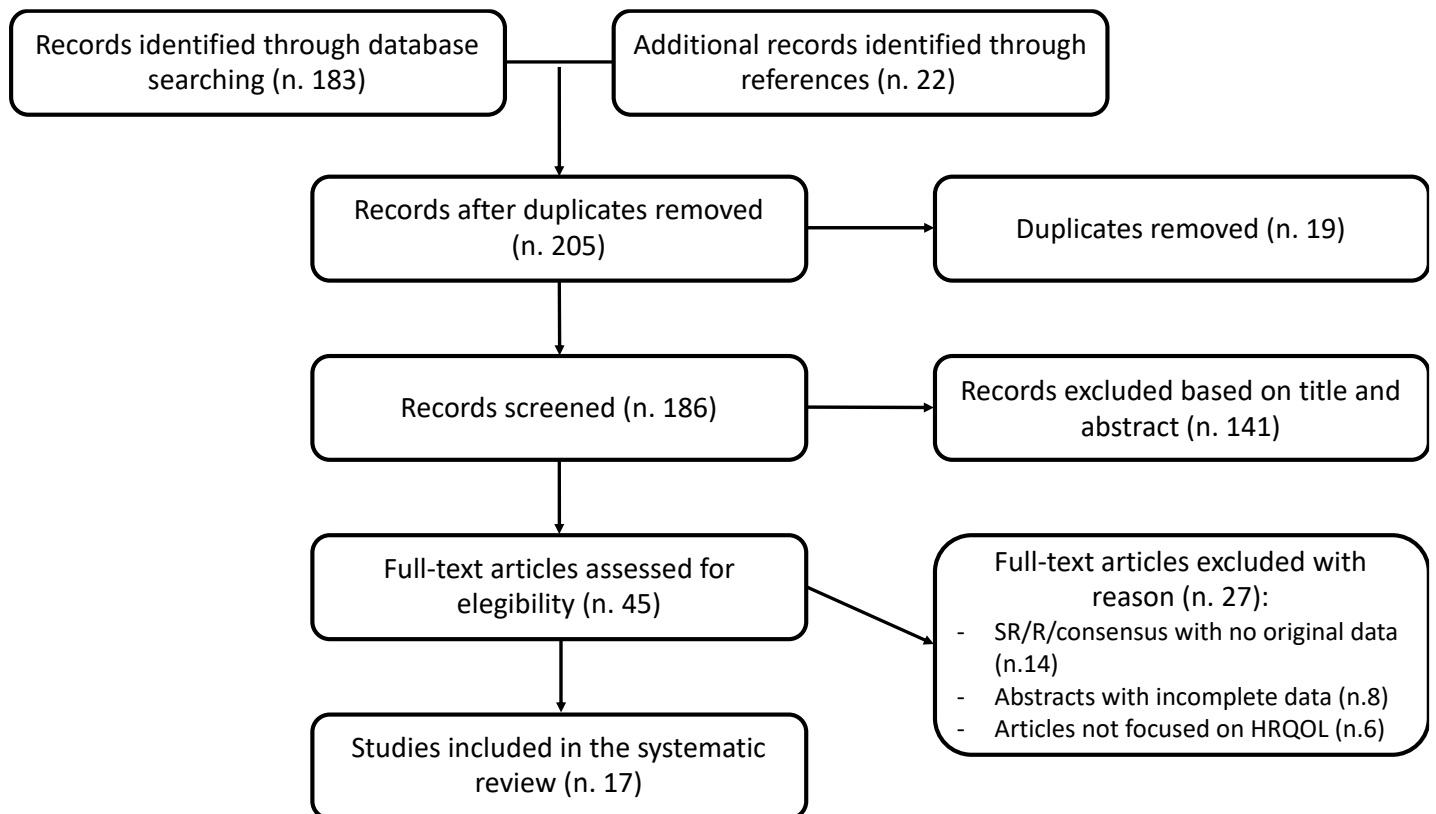

**Workgroup 5:**

**PICO 05: Is there a role for bismuth subsalicylate in MC?**

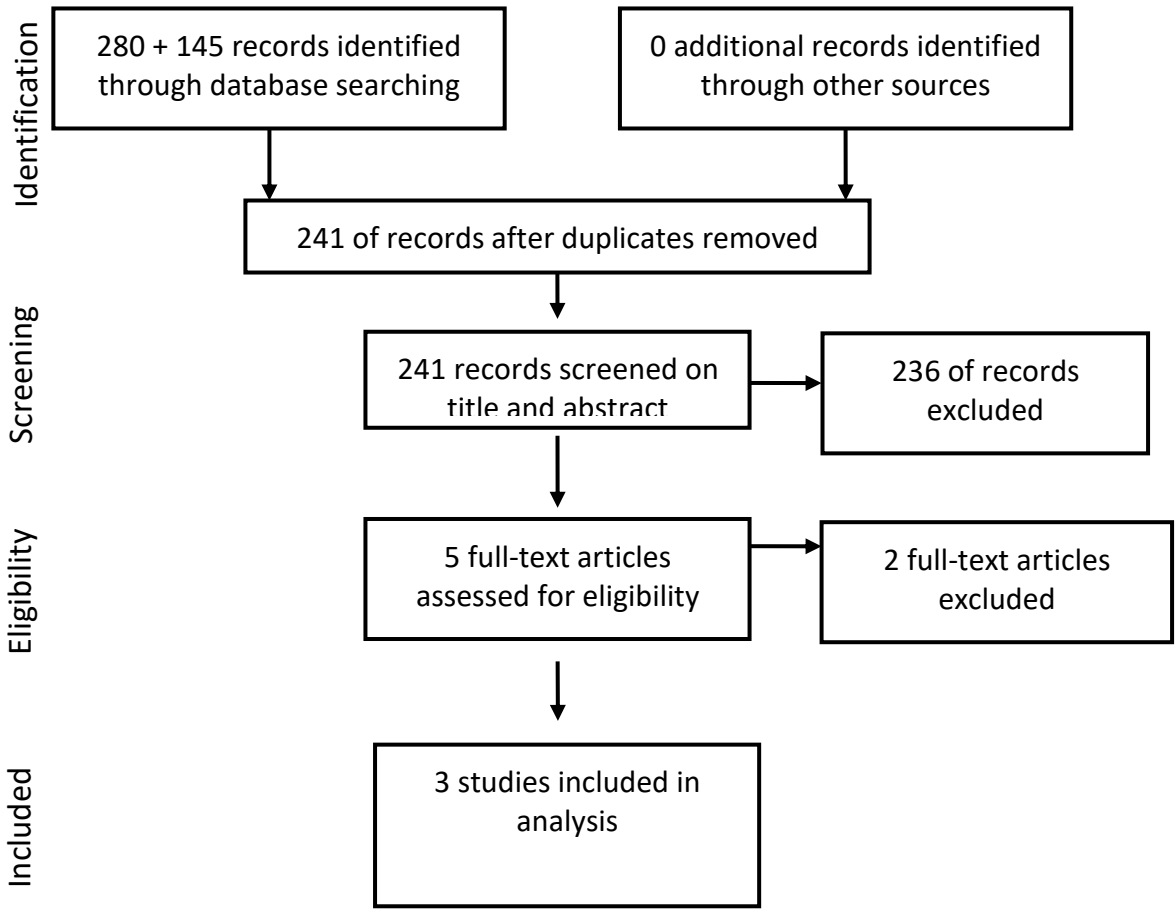

**PICO 06: Is there a role for loperamide in MC?**

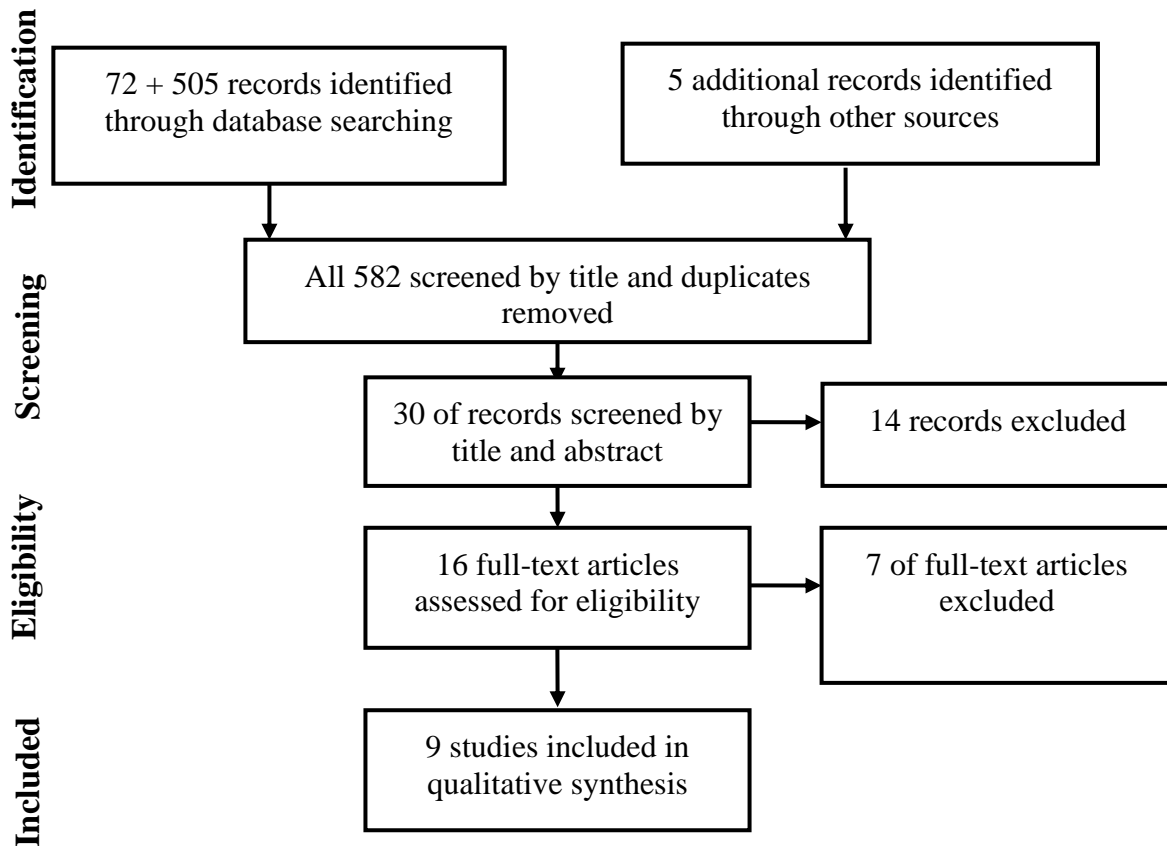

**PICO 07: Is there a role for bile acid binding agents in MC?**

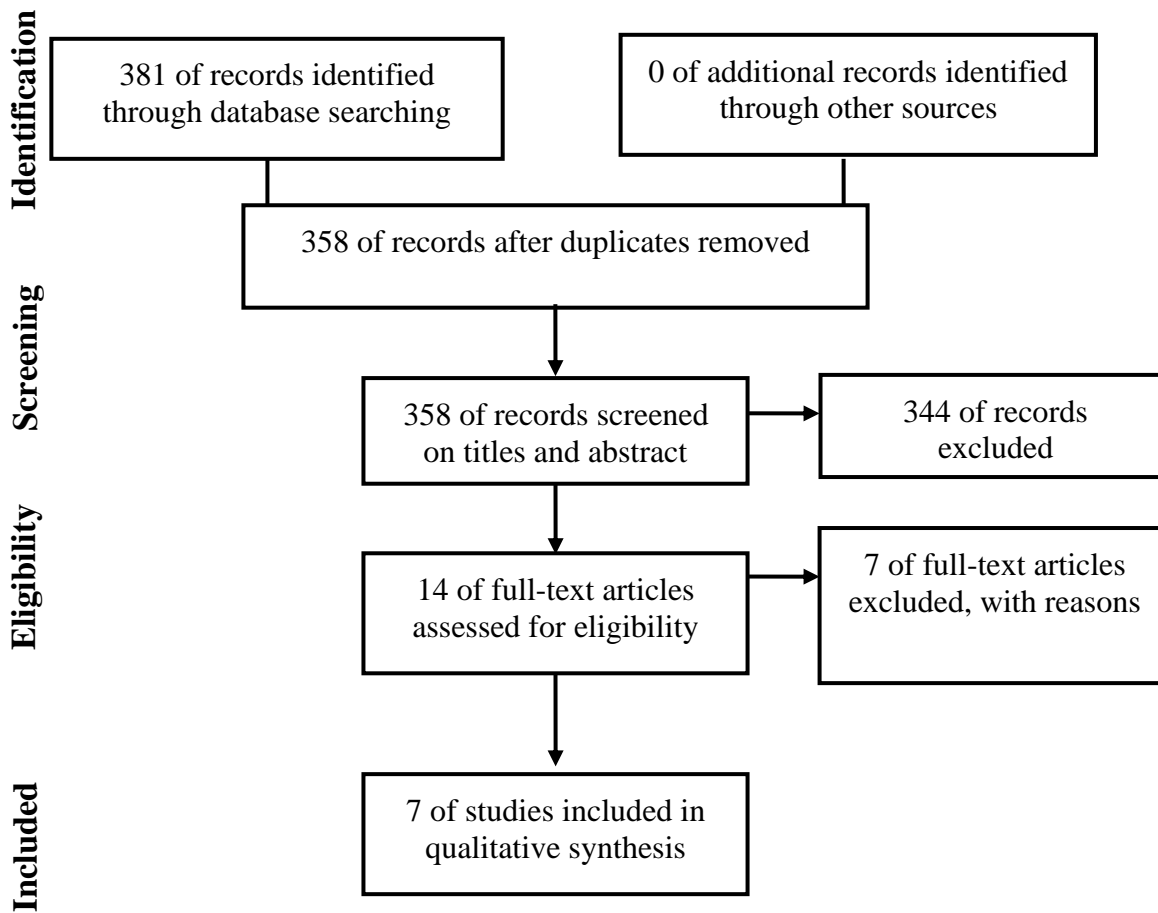

**PICO10: Is there a role for probiotics in MC?**

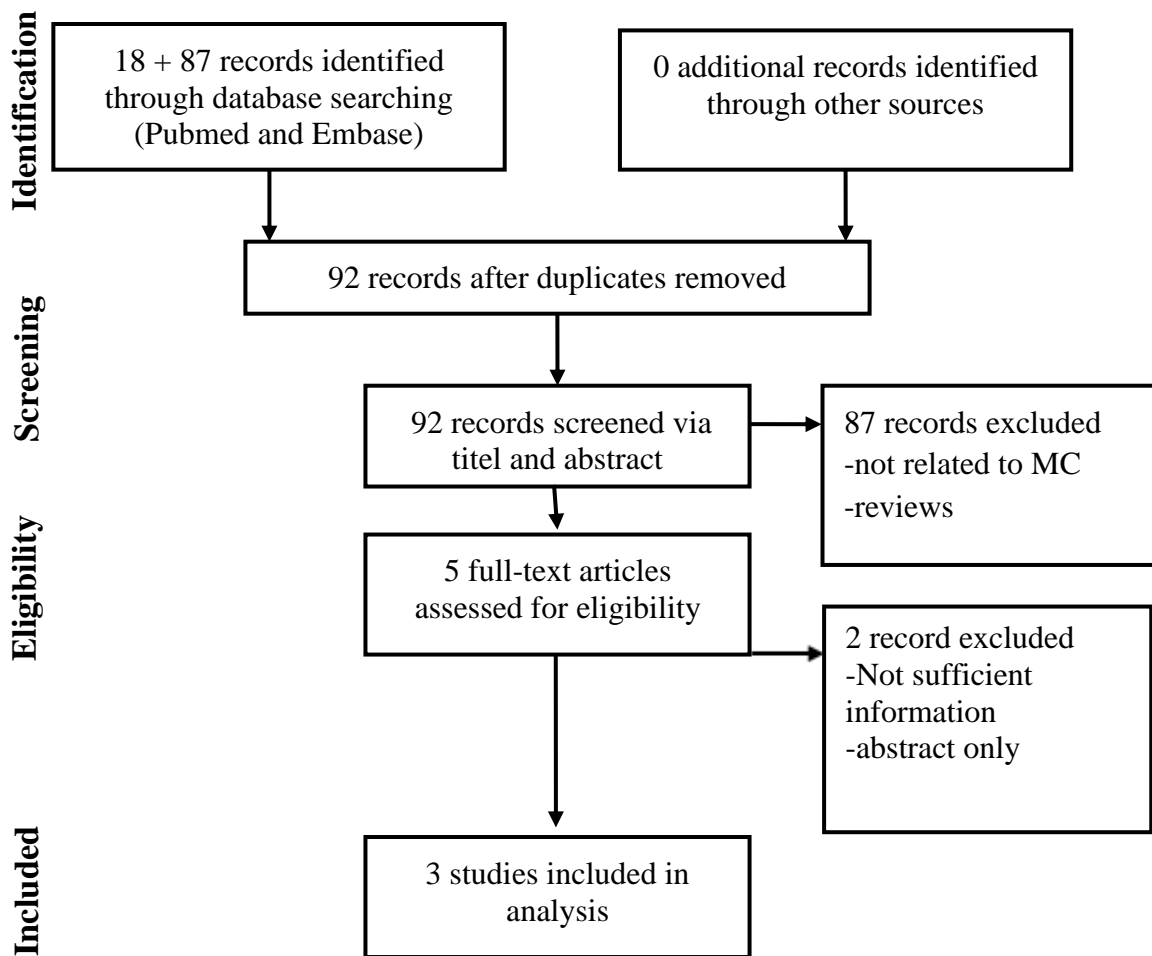



**PICO11: Is there a role for other steroids in MC?**

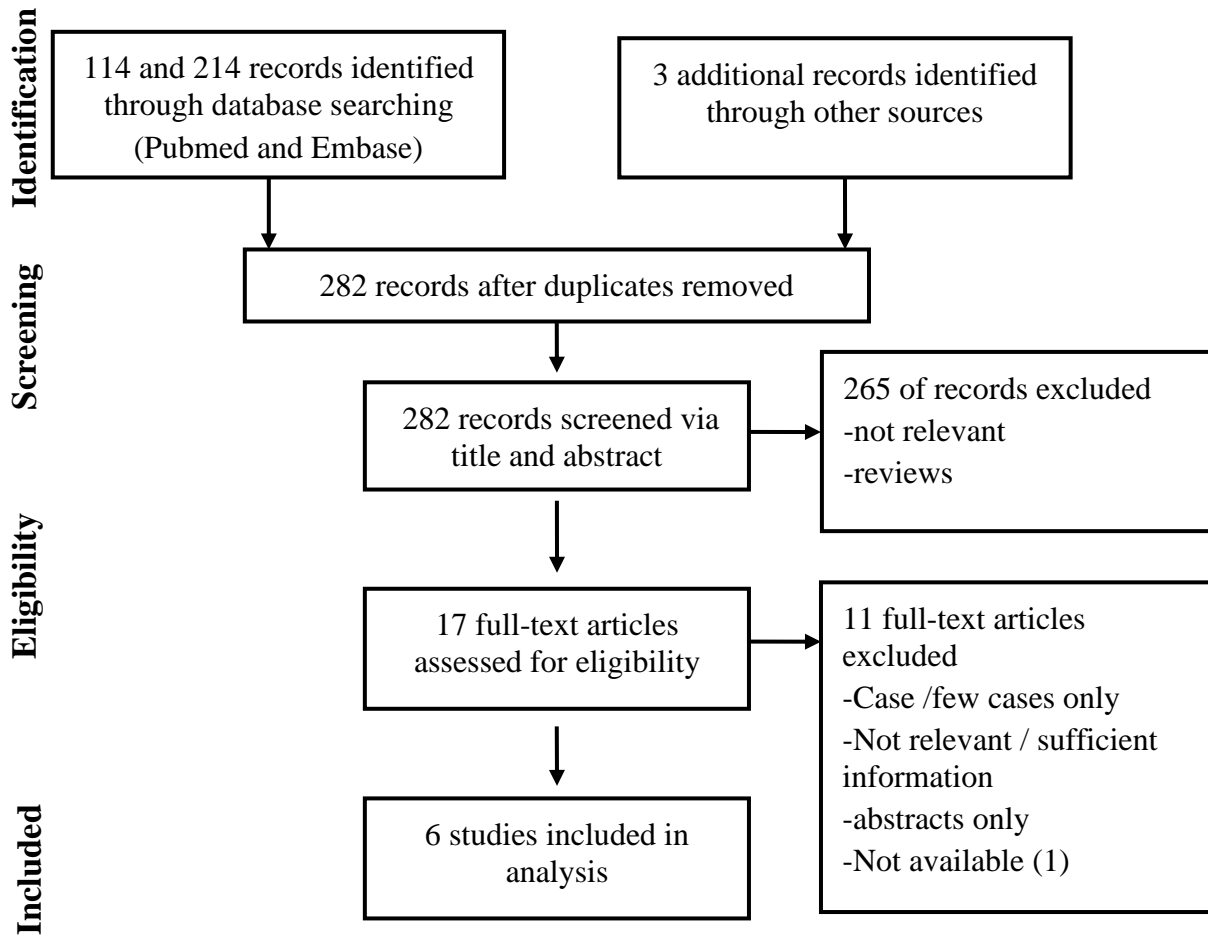

**PICO 12: Is there a role for immunomodulators in MC?**

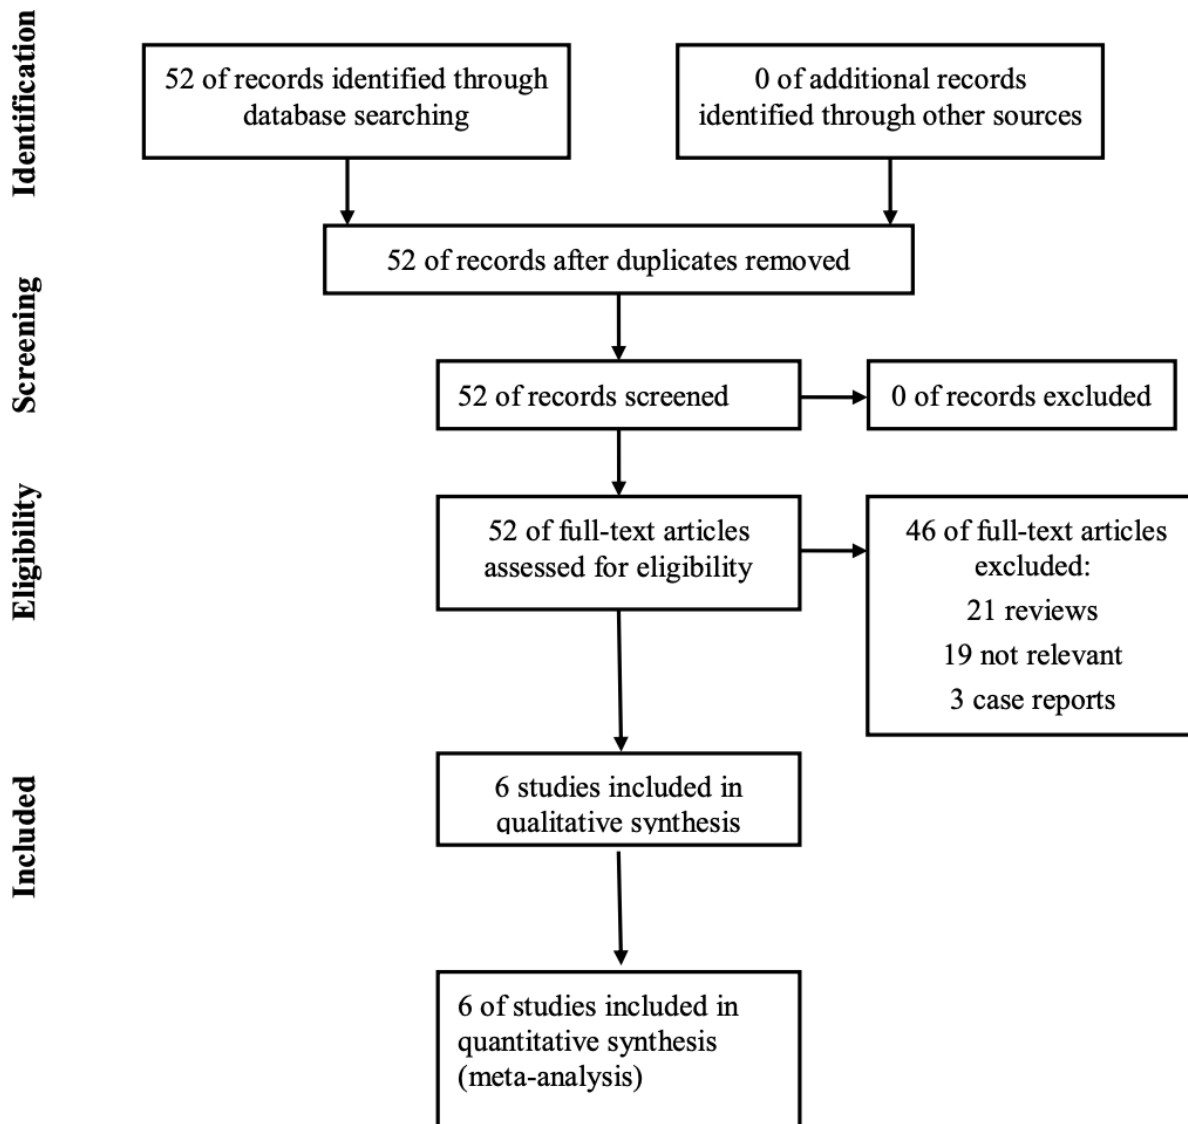

**PICO 13: Is there a role for biologics in MC?**

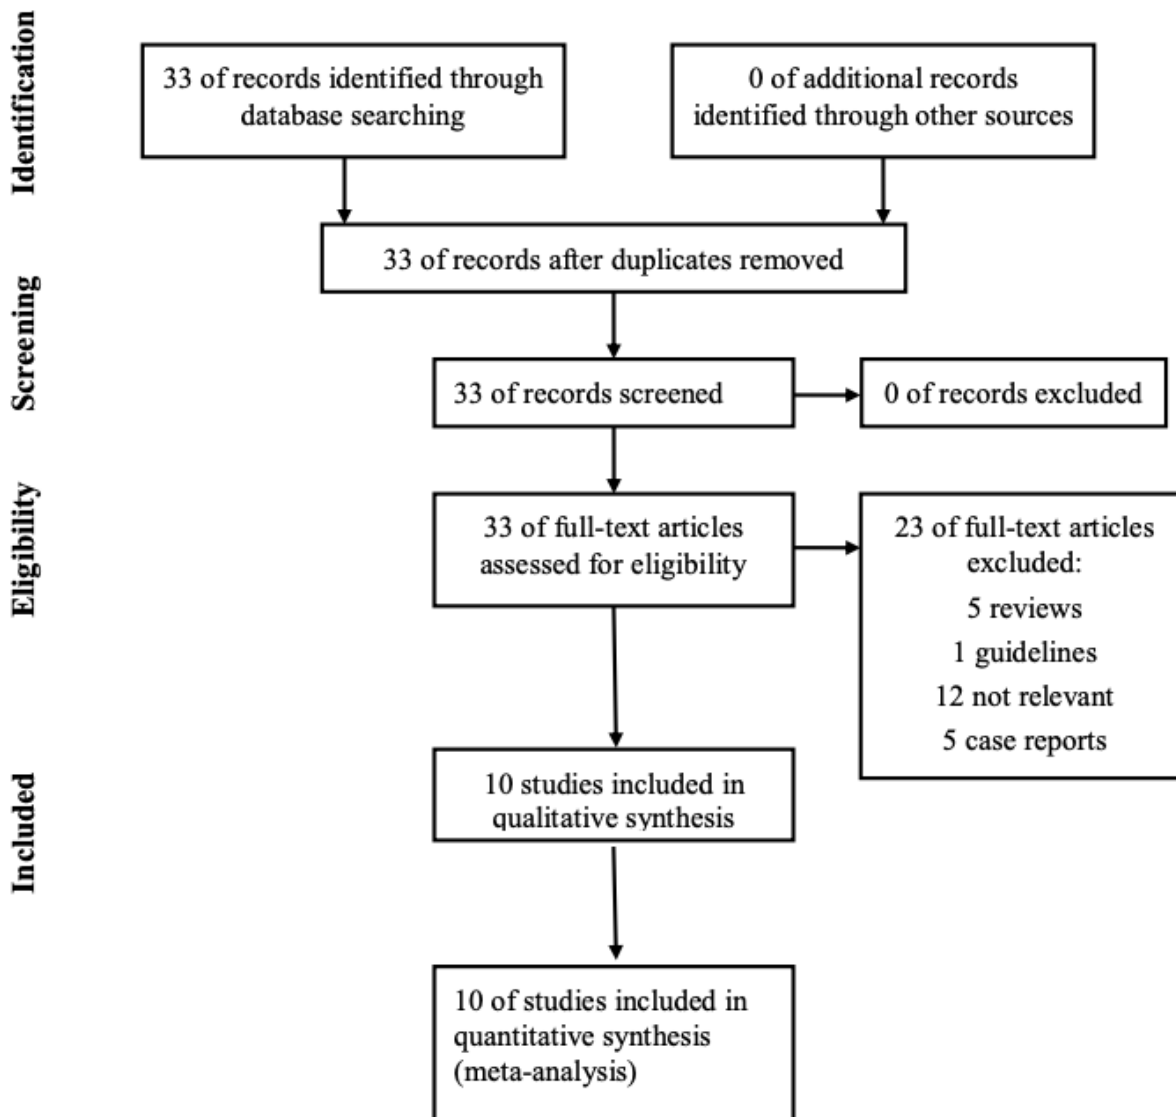

**PICO 14: Is there a role for surgery in MC?**

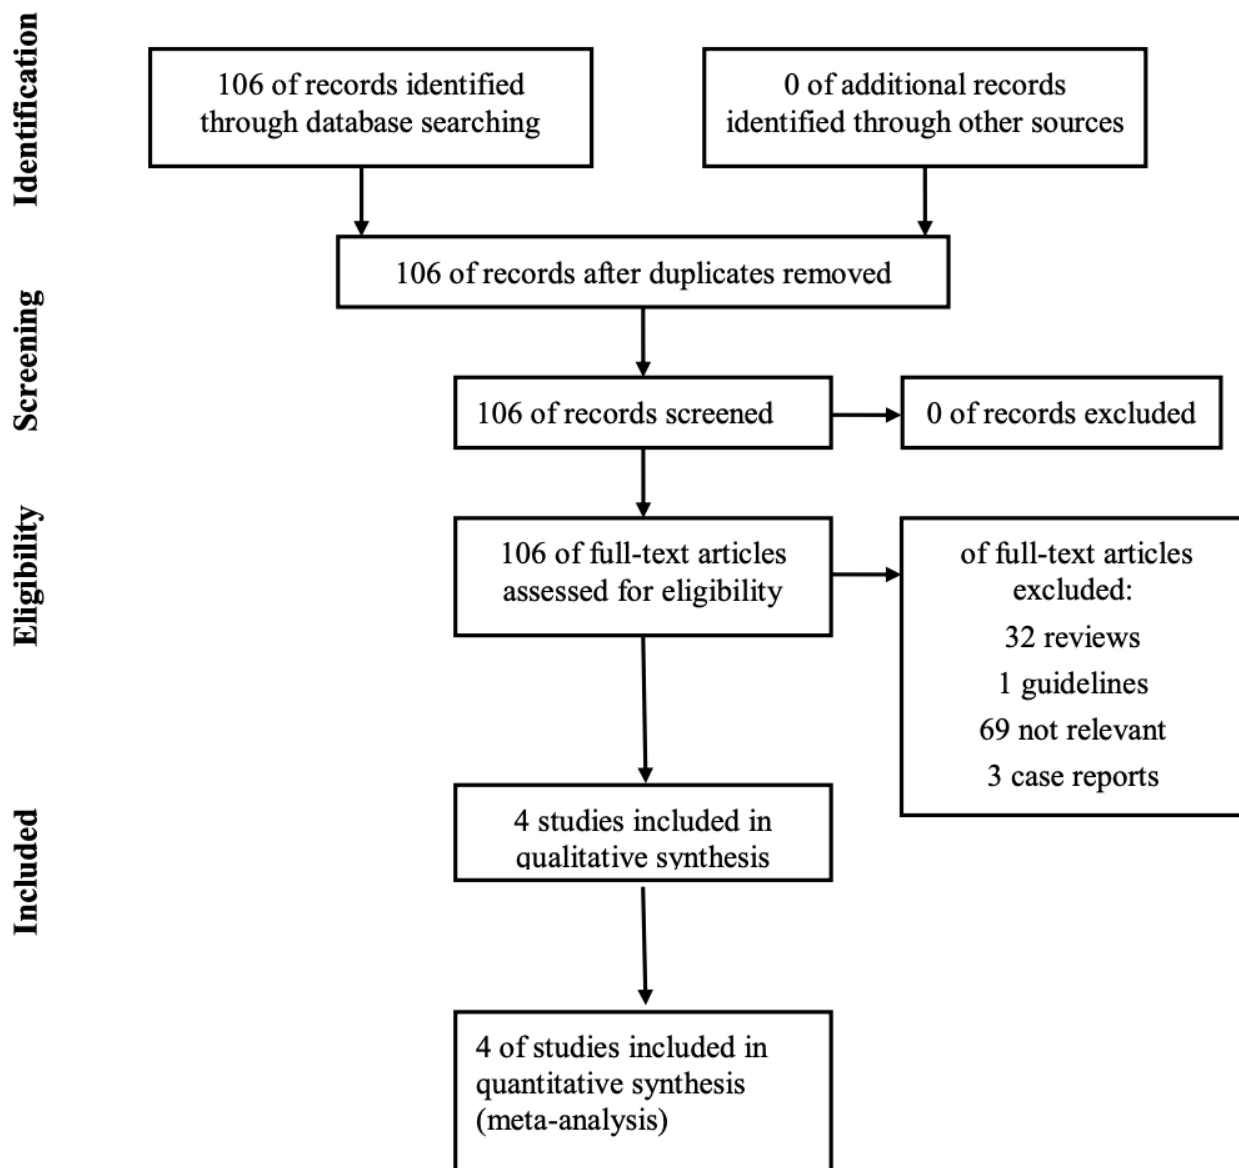

## Supplementary material – Appendix B

### Data extraction tables

#### Abbreviations

---

Abd. = Abdominal

CC = Collagenous Colitis

CI = Confidence Interval

CRC = Colorectal Cancer

CS = Case Study

Erythro = Erythromycin

F = Female

F/M ratio = Female/Male Ratio

GI = Gastro Intestinal

HADS = Hospital Anxiety and Depression Scale

IBDQ = Inflammatory Bowel Disease Questionnaire

IBS = Irritable Bowel Syndrome

LC = Lymphocytic Colitis

MC = Microscopic Colitis

Metro = Metronidazole

n.a. = not applicable

NA = Not Available

NL = Netherlands

Norflox = Norfloxacin

NS = Not significant

NSAID = Nonsteroidal anti-inflammatory drugs

OR = Odds Ratio

PGWB = Psychological General Well-Being

PHQ15 = Patient Health Questionnaire 15

PPI=Proton-Pump Inhibitors

Prosp = Prospective

Pts = patients

RCT = randomized controlled trial

Retrospective = Retrospective

RFIPC = Inflammatory Bowel Disease Patient Concerns

RR = Relative Risk

SeHCAT = 75Se-23-selena-25-homotaurocholate

SF-30

SF-36

SHS = Short Health Scale

SSRI = Selective Serotonin Reuptake Inhibitors

TaC = total antioxidant capacity

UK = United Kingdom

USA = United States of America

\* Quality rating established on the basis of Joanna Briggs Institute critical Appraisal Checklists











## Data extraction sheet – PICO 04 & 06 a. Smoking

| PICO 04: Is smoking a riskfactor for MC? & PICO 06: In MC patients does smoking cessation influence the disease course? |            |                                       |                         |                        |                                  |            |                          |                         |                        |                                    |            |                          |                         |                        |                                    |                  |                    |                                |                               |                              |                                          |
|-------------------------------------------------------------------------------------------------------------------------|------------|---------------------------------------|-------------------------|------------------------|----------------------------------|------------|--------------------------|-------------------------|------------------------|------------------------------------|------------|--------------------------|-------------------------|------------------------|------------------------------------|------------------|--------------------|--------------------------------|-------------------------------|------------------------------|------------------------------------------|
| STUDIES                                                                                                                 |            | Smoking habit results and conclusions |                         |                        |                                  |            |                          |                         |                        |                                    |            |                          |                         |                        |                                    |                  |                    |                                |                               |                              |                                          |
| Fisrt Author (year, Country)                                                                                            | N total MC | N Current smokers MC (%)              | N Former smokers MC (%) | N Never smokers MC (%) | N No smokers never+former MC (%) | N total CC | N Current smokers CC (%) | N Former smokers CC (%) | N Never smokers CC (%) | N No smokers (former+never) CC (%) | N total LC | N Current smokers LC (%) | N Former Smokers LC (%) | N Never smokers LC (%) | N No smokers (former+never) LC (%) | N total controls | Control type       | N Current smokers Controls (%) | N Former smokers Controls (%) | N Never smokers Controls (%) | N No smokers (former+never) Controls (%) |
| Burke (2018, USA)                                                                                                       | 166        | 27 (16.3%)                            | 78 (47%)                | 61 (36.8%)             | 139 (83.7%)                      | 78         | 16 (20.5%)               | 37 (47.4%)              | 25 (32%)               | 62 (79.5%)                         | 76         | 10 (13.2%)               | 33 (43.4%)              | 33 (43.4%)             | 66 (86.8%)                         | 230986           | General population | 53582 (23.2%)                  | 51547 (22.3%)                 | 125857 (54.5%)               | 177404 (76.8%)                           |
| Cotter (2017, USA)                                                                                                      | 81         | NA                                    | NA                      | NA                     | NA                               | 32         | NA                       | NA                      | NA                     | NA                                 | 49         | NA                       | NA                      | NA                     | NA                                 | 536              | Chronic diarrhea   | NA                             | NA                            | NA                           | NA                                       |
| Fernández-Bañares (2013, Spain)                                                                                         | 190        | 39 (20.5%)                            | NA                      | NA                     | 151 (79.5%)                      | 120        | 22 (18.3%)               | NA                      | NA                     | 98 (81.7%)                         | 70         | 17 (24.3%)               | NA                      | NA                     | 53 (75.7%)                         | 128              | General population | 12 (9.4%)                      | NA                            | NA                           | 116 (90.6%)                              |
| Gu (2012, China)                                                                                                        | 87         | 17 (19.5%)                            | NA                      | NA                     | 70 (80.5%)                       | 28         | 5 (17.9%)                | NA                      | NA                     | 23 (82.1%)                         | 51         | 12 (23.5%)               | NA                      | NA                     | 39 (76.5%)                         | 90               | Chronic diarrhea   | 15 (16.7%)                     | NA                            | NA                           | 75 (83.3%)                               |
| Guagnozzi (2015, Spain)                                                                                                 | 46         | 13 (28.3%)                            | 2 (4.3%)                | 31 (67.4%)             | 33 (71.7%)                       | 4          | NA                       | NA                      | NA                     | NA                                 | 42         | NA                       | NA                      | NA                     | NA                                 | 317              | Chronic diarrhea   | 82 (25.9%)                     | 17 (5.4%)                     | 218 (68.8%)                  | 235 (74.1%)                              |
| Larsson (2016, Sweden)                                                                                                  | 135        | 55 (40.7%)                            | 41 (30.4%)              | 39 (28.9%)             | 80 (59.3%)                       | 73         | NA                       | NA                      | NA                     | NA                                 | 62         | NA                       | NA                      | NA                     | NA                                 | 27960            | General population | 7878 (28.2%)                   | 9465 (33.9%)                  | 10650 (37.9%)                | 20115 (71.8%)                            |
| Roth (2014, Sweden)                                                                                                     | 131        | 47 (35.9%)                            | 48 (36.6%)              | 36 (27.5%)             | 84 (64.1%)                       | 82         | NA                       | NA                      | NA                     | NA                                 | 49         | NA                       | NA                      | NA                     | NA                                 | 737              | General population | 205 (27.8%)                    | 220 (29.9%)                   | 312 (42.3%)                  | 532 (72.2%)                              |
| Thorn (2013, Sweden)                                                                                                    | 272        | 49 (18%)                              | NA                      | NA                     | 223 (82%)                        | 154        | 21 (13.6%)               | NA                      | NA                     | 133 (86.4%)                        | 118        | 28 (23.7%)               | NA                      | NA                     | 90 (76.3%)                         | NA               | General population | NA (15.3%)                     | NA                            | NA                           | NA                                       |
| Verhaegh (2017, NL)                                                                                                     | 171        | 65 (38.7%)                            | 63 (37.5%)              | 40 (23.8%)             | 103 (66.9%)                      | 81         | NA                       | NA                      | NA                     | NA                                 | 73         | NA                       | NA                      | NA                     | NA                                 | 316              | General population | 40 (12.6%)                     | 140 (45%)                     | 131 (42.1%)                  | 276 (87.4%)                              |
| Vigren (2011, Sweden)                                                                                                   | NA         | NA                                    | NA                      | NA                     | NA                               | 116        | 43 (37.1%)               | NA                      | NA                     | 73 (62.9%)                         | 0          | NA                       | NA                      | NA                     | NA                                 | 6192             | General population | 1053 (17%)                     | NA                            | NA                           | 5139 (83%)                               |
| Wickbom (2017, Sweden)                                                                                                  | 212        | 55 (25.9%)                            | 78 (36.8%)              | 69 (32.6%)             | 157 (74.1%)                      | 109        | 31 (28.5%)               | 46 (43.4%)              | 32 (29.4%)             | 78 (71.6%)                         | 93         | 24 (26%)                 | 32 (34.4%)              | 37 (39.9%)             | 69 (74.2%)                         | 477              | General population | 61 (12.8%)                     | 169 (26.9%)                   | 247 (39.4%)                  | 416 (87.2%)                              |
| Wildt (2018, Denmark)                                                                                                   | 50         | 17 (34%)                              | NA                      | NA                     | 33 (66%)                         | 35         | NA                       | NA                      | NA                     | NA                                 | 15         | NA                       | NA                      | NA                     | NA                                 | 49               | General population | 5 (10%)                        | NA                            | NA                           | 44 (90%)                                 |
| Yen (2011, USA)                                                                                                         | 340        | 52 (15.3%)                            | 141 (41.5%)             | 147 (43.2%)            | 288 (84.7%)                      | 124        | 23 (18.6%)               | 48 (38.7%)              | 53 (42.7%)             | 101 (81.4%)                        | 216        | 29 (13.4%)               | 93 (43.1%)              | 94 (43.5%)             | 187 (86.6%)                        | 340              | General population | 17 (5%)                        | 113 (33.2%)                   | 210 (61.8%)                  | 323 (95%)                                |
| Fernández-Bañares (2013, Spain)                                                                                         | 184        | 31 (16.8%)                            | 22 (11.9%)              | 123 (66.8%)            | NA                               | 118        | 22 (18.6%)               | 17 (14.4%)              | 79 (66.9%)             | 96 (81.4%)                         | 66         | 17 (25.7%)               | 5 (7.5%)                | 44 (66.7%)             | 49 (74.3%)                         | Not included     | -                  | NA                             | NA                            | NA                           | NA                                       |
| Fernández-Bañares (2017, Spain)                                                                                         | 0          | NA                                    | NA                      | NA                     | NA                               | 75         | NA (21.5%)               | NA (5.5%)               | NA (7.3%)              | NA                                 | 0          | NA                       | NA                      | NA                     | NA                                 | Not included     | -                  | NA                             | NA                            | NA                           | NA                                       |
| Fernández-Bañares (2016, Spain)                                                                                         | 141        | NA                                    | NA                      | NA                     | NA                               | 67         | NA                       | NA                      | NA                     | NA                                 | 94         | NA                       | NA                      | NA                     | NA                                 | Not included     | -                  | NA                             | NA                            | NA                           | NA                                       |
| Gentile (2013, USA)                                                                                                     | 52         | 19 (37%)                              | 33 (63%)                | NA                     | NA                               | 27         | NA                       | NA                      | NA                     | NA                                 | 25         | NA                       | NA                      | NA                     | NA                                 | Not included     | -                  | NA                             | NA                            | NA                           | NA                                       |
| Münch (2016)                                                                                                            | 0          | NA                                    | NA                      | NA                     | NA                               | 202        | 73 (36%)                 | 58 (29%)                | 71 (35%)               | 129 (64%)                          | 0          | NA                       | NA                      | NA                     | NA                                 | Not included     | -                  | NA                             | NA                            | NA                           | NA                                       |
| O'Toole (2014, Ireland)                                                                                                 | 222        | 38 (17%)                              | 14 (6.3%)               | 151 (68%)              | NA                               | 123        | NA                       | NA                      | NA                     | NA                                 | 99         | NA                       | NA                      | NA                     | NA                                 | Not included     | -                  | NA                             | NA                            | NA                           | NA                                       |
| Roth (2013, Sweden)                                                                                                     | 158        | 53 (33.5%)                            | 64 (40.5%)              | 41 (25.9%)             | NA                               | 92         | NA                       | NA                      | NA                     | NA                                 | 66         | NA                       | NA                      | NA                     | NA                                 | Not included     | -                  | NA                             | NA                            | NA                           | NA                                       |

## Data extraction sheet PICO 04 & 06 b. Smoking

| PICO 04: Is smoking a riskfactor for MC? & PICO 06: In MC patients does smoking cessation influence the disease course? |                                                                                                                                                                                                                                                                                                                                                                                                                                                                                                                                                                                                                                                          |                     |                           |                 |
|-------------------------------------------------------------------------------------------------------------------------|----------------------------------------------------------------------------------------------------------------------------------------------------------------------------------------------------------------------------------------------------------------------------------------------------------------------------------------------------------------------------------------------------------------------------------------------------------------------------------------------------------------------------------------------------------------------------------------------------------------------------------------------------------|---------------------|---------------------------|-----------------|
| STUDIES                                                                                                                 |                                                                                                                                                                                                                                                                                                                                                                                                                                                                                                                                                                                                                                                          | STUDY METHODS       |                           |                 |
| First Author (year, Country)                                                                                            | Conclusion Note                                                                                                                                                                                                                                                                                                                                                                                                                                                                                                                                                                                                                                          | Study sub-type      | Retrospective/Prospective | Quality rating* |
| Burke (2018, USA)                                                                                                       | No association with age of onset MC, association with the intensity of smoking, the risk of MC decline significantly over time (>5 years), current smoking was associated with an increased risk of CC but not of LC.                                                                                                                                                                                                                                                                                                                                                                                                                                    | Cohort              | Prospective               | Good            |
| Cotter (2017, USA)                                                                                                      | Current smoking is a risk factors for MC in multivariable-adjusted logistic regression model.                                                                                                                                                                                                                                                                                                                                                                                                                                                                                                                                                            | Case-control        | Retrospective             | Moderate        |
| Fernández-Bañares (2013, Spain)                                                                                         | In relation to current smoking there were no differences in either the number of cigarettes per day or the duration of the smoking habit between groups. Frequency of current smokers was higher in young ages, being significant differences both CC and LC and the control group.                                                                                                                                                                                                                                                                                                                                                                      | Case-control        | Prospective               | Good            |
| Gu (2012, China)                                                                                                        | Not significant association of smoking habits with MC.                                                                                                                                                                                                                                                                                                                                                                                                                                                                                                                                                                                                   | Case-control        | Prospective               | Good            |
| Guagnozzi (2015, Spain)                                                                                                 | Not significant association of smoking habits with MC.                                                                                                                                                                                                                                                                                                                                                                                                                                                                                                                                                                                                   | Case-control        | Prospective               | Good            |
| Larsson (2016, Sweden)                                                                                                  | A reduced risk for MC could be seen in both non-drinkers/non-smokers and drinkers/non-smokers, an increased risk was observed, although not statistically significant. There was a strong association between smoking and MC risk (P<0.001).                                                                                                                                                                                                                                                                                                                                                                                                             | Case-control        | Prospective               | Good            |
| Roth (2014, Sweden)                                                                                                     | There was an increased risk for both former and current smokers to develop MC (specially for MC with IBS-like symptoms) and no difference between persistent and transient MC groups was observed.                                                                                                                                                                                                                                                                                                                                                                                                                                                       | Case-control        | Retrospective             | Good            |
| Thorn (2013, Sweden)                                                                                                    | Smoking was more prevalent in females compared with the background, however this difference reached significance only for LC patients.                                                                                                                                                                                                                                                                                                                                                                                                                                                                                                                   | Cohort/case-control | Prospective               | Moderate        |
| Verhaegh (2017, NL)                                                                                                     | The duration of nicotine exposure enhanced the risk of MC (OR 1.03 95% CI: 1.02-1.06 per years), the average at diagnosis was 58.8 (+/- 9.7 years) vs 59.8 (+/- 12.1 years), p<0.001 for smoking versus nonsmoking at index date, respectively. Passive smoking at work at the index date was also associated with MC (OR: 3.05 95%CI 1.29-7.22) and no association was observed for subjects who had 1 or 2 smoking parents, were exposed to hazardous substances at work or reported a period of excessive alcohol before the index date. The duration of smoking in years was higher in MC patients vs controls (29.1+/-13.8 vs 23.5+/-13.8 p<0.001). | Case-control        | Retrospective             | Good            |
| Vigren (2011, Sweden)                                                                                                   | Smoking habits did not affect disease activity although there was less activity among those who had never smoked.                                                                                                                                                                                                                                                                                                                                                                                                                                                                                                                                        | Case-control        | Retrospective             | Good            |
| Wickbom (2017), Sweden                                                                                                  | Smokers have a 3-4 fold increased risk for both CC and LC and earlier onset of disease (10 years).                                                                                                                                                                                                                                                                                                                                                                                                                                                                                                                                                       | Case-control        | Retrospective             | Good            |
| Wildt (2018, Denmark)                                                                                                   | Smoking was more prevalent among patients with MC (34% vs 10%) than in the control group (p=0.01).                                                                                                                                                                                                                                                                                                                                                                                                                                                                                                                                                       | Case-control        | Prospective               | Moderate        |
| Yen (2011, USA)                                                                                                         | Both former and current cigarette smoking was significantly higher in the MC, LC and CC groups, when separated by gender, rates of current or former smoking were still higher in all MC groups across gender.                                                                                                                                                                                                                                                                                                                                                                                                                                           | Case-control        | Retrospective             | Good            |
| Fernández-Bañares (2013, Spain)                                                                                         | Current smokers developed diarrhea onset >10 years earlier than non smokers. There were no significant differences in either clinical presentation or clinical remission rate.                                                                                                                                                                                                                                                                                                                                                                                                                                                                           | Cohort              | Prospective               | Good            |
| Fernández-Bañares (2017, Spain)                                                                                         | Smoking habit is not a risk factor for needing maintenance treatment with budesonide according to the use of NSAIDs.                                                                                                                                                                                                                                                                                                                                                                                                                                                                                                                                     | Cohort              | Retrospective             | Moderate        |
| Fernández-Bañares (2016, Spain)                                                                                         | There were no differences between patients achieving prolonged disease remission and those not doing so in terms of smoking habits.                                                                                                                                                                                                                                                                                                                                                                                                                                                                                                                      | Prevalence          | Retrospective             | Good            |
| Gentile (2013, USA)                                                                                                     | Smoking status was not associated with recurrence and the need for maintenance corticoid therapy (p=0.65). Smoking status does not impact initial corticoid treatment response, recurrence or need for maintenance corticoids in patients with MC.                                                                                                                                                                                                                                                                                                                                                                                                       | Prevalence          | Retrospective             | Moderate        |
| Münch (2016)                                                                                                            | Current smokers had an increased number of watery stools at baseline compared with non-smokers (p=0.051). No association between the quantity of smoking (cigarettes/day) at baseline and the number of watery stools was observed. An association was found between smoking status (current smokers vs non-smokers OR 0.19 (0.05-0.73), p=0,016) and decreased likelihood of obtaining clinical remission in the logistic regression model.                                                                                                                                                                                                             | RCTs                | Retrospective             | Moderate        |
| O'Toole (2014, Ireland)                                                                                                 | Smoking habit is not a risk factor for spontaneous remission.                                                                                                                                                                                                                                                                                                                                                                                                                                                                                                                                                                                            | Prevalence          | Retrospective             | Moderate        |
| Roth (2013, Sweden)                                                                                                     | Patients with higher education smoked to a lesser extent than those who had no university degree (MC vs MC with IBS symptoms).                                                                                                                                                                                                                                                                                                                                                                                                                                                                                                                           | Prevalence          | Retrospective             | Moderate        |



## Data extraction sheet – PICO 07 Drug Risk

| PICO 07: Is drug use associated with a significant increased risk of MC? |                              |       |       |         |                                         |                       |                        |                         |                              |                                               |       |          |       |          |        |          |        |          |     |               |                           |
|--------------------------------------------------------------------------|------------------------------|-------|-------|---------|-----------------------------------------|-----------------------|------------------------|-------------------------|------------------------------|-----------------------------------------------|-------|----------|-------|----------|--------|----------|--------|----------|-----|---------------|---------------------------|
| STUDIES                                                                  | STUDY GROUPS                 |       |       |         |                                         |                       |                        |                         |                              | PPI                                           |       | SSRI     |       | STATIN   |        | NSAID    |        | ASPIRIN  |     | STUDY METHODS |                           |
|                                                                          | Fisrt Author (year, Country) | N MC  | N CC  | N LC    | N controls                              | Type of control group | N (%) Drugs induced MC | OR[95%IC] or P value MC | N (%) drugs induced Controls | Time retained between start drug and dg of MC | MC    | Controls | MC    | Controls | MC     | Controls | MC     | Controls | MC  | Controls      | Retrospective/Prospective |
| Riddell (1992, Canada)                                                   | 31                           | 31    | 0     | 31      | IBS and diverticular disease            | 19 (61.2%)            | < 0.02                 | 4 (12.9%)               | > 6 monthes                  | NA                                            | NA    | NA       | NA    | NA       | NA     | 15       | 1      | 11       | 3   | Retrospective | Good                      |
| Fernandez-Bañares (2007, Spain)                                          | 78                           | 39    | 39    | 97      | Outpatients attending surgery           | CC 92 / CL 90         | < 0.05                 | 72.8                    | not detrimed                 | 14                                            | 17    | 18       | 1     | 6        | 3      | 23       | 22     | 4        | 6   | Retrospective | Good                      |
| Keszthelyi (2010, NL)                                                    | 95                           | NA    | NA    | 355     | Community-based controls                | PPIs 37.9             | 4.5 (2.0-9.5)          | PPIs 2.6                | 6 monthes                    | 36                                            | 45    | NA       | NA    | NA       | NA     | 19       | 26     | NA       | NA  | Retrospective | Good                      |
| Pascua (2011, USA)                                                       | 26                           | 11    | 15    | 518     | Chronic diarrhea                        | 88                    | 259/259                | 98/96                   | 12 monthes                   | 3                                             | 206   | 5        | 124   | 6        | 183    | NA       | NA     | NA       | NA  | Retrospective | Good                      |
| Harma (2011, NA)                                                         | 9                            | 0     | 9     | 33      | Colonoscopy control                     | NA                    | NA                     | NA                      | NA                           | 3                                             | 12    | NA       | NA    | NA       | NA     | NA       | NA     | NA       | NA  | Retrospective | Moderate                  |
| Fernandez-Bañares (2013, Spain)                                          | 190                          | 120   | 70    | 128     | Outpatients attending surgery           | NA                    | NA                     | NA                      | 15-60 months                 | 62                                            | 38    | 15       | 13    | NA       | NA     | NA       | NA     | 34       | 10  | Prospective   | Good                      |
| Macaigane (2014, France)                                                 | 129                          | 42    | 87    | 278     | Functional bowel disorder with diarrhea | 53                    | 3.7 ( 2.1–6.6)         | 24                      | 3 monthes                    | 12                                            | 3     | 6        | 9     | 5        | 1      | 5        | 6      | NA       | NA  | Prospective   | Good                      |
| Bonderup (2014, Denmark)                                                 | 5.751                        | 3.474 | 2.277 | 575.100 | Community-based controls                | CC 80.5 / CL 73.2     | NA                     | 49.8 / 46.7             | 12 monthes                   | 4039                                          | 78704 | 1158     | 48332 | 1643     | 295659 | 2075     | 139545 | NA       | NA  | Retrospective | Good                      |
| Guagnozzi (2015, Spain)                                                  | 46                           | 4     | 42    | 317     | Chronic diarrhea                        | 33 (71.7)             | NA                     | 215 (67.8)              | NA                           | 22                                            | 128   | 43       | 124   | NA       | NA     | 8        | 33     | 2        | 28  | Retrospective | Good                      |
| Masclee (2015, NL)                                                       | 218                          | 92    | 70    | 15.045  | Community-based and colonoscopy control | NA                    | NA                     | NA                      | 3 months                     | 66                                            | 398   | 20       | 90    | 39       | 349    | 27       | 225    | 32       | 105 | Prospective   | Good                      |
| Yen (NA)                                                                 | 64                           | NA    | NA    | 121     | Chronic diarrhea                        | NA                    | NA                     | NA                      | >2 weeks                     | 16                                            | 32    | 6        | 9     | 21       | 30     | 29       | 24     | 16       | 12  | Prospective   | Good                      |
| Verhaegh (2016, UK)                                                      | 1.211                        | 394   | 292   | 6.041   | Community-based controls                | 64.6                  | 0.38 (0.33-0.44)       | 43.6                    | 6 monthes                    | 506                                           | 1054  | 186      | 451   | 327      | 1431   | 250      | 679    | NA       | NA  | Retrospective | Good                      |
| Bonderup (2018, Denmark)                                                 | 10.652                       | 6.254 | 4.398 | 101.381 | Community-based controls                | PPIs : 11.9%          | 3.95 (3.60-4.33)       | PPIs 3.76%              | 3 monthes                    | 3737                                          | 9879  | 2449     | 10252 | 2456     | 17400  | 2024     | 11341  | NA       | NA  | Retrospective | Good                      |

## Data extraction sheet – PICO 08 a. Drug withdrawal

| PICO8: Shoul any drug, potentially related to MC onset, been withdrawn? |          |      |      |                                                      |                                            |                                                |                              |                                                 |                    |                 |
|-------------------------------------------------------------------------|----------|------|------|------------------------------------------------------|--------------------------------------------|------------------------------------------------|------------------------------|-------------------------------------------------|--------------------|-----------------|
| STUDIES                                                                 | PATIENTS |      |      | DRUG INTAKE                                          |                                            |                                                |                              | STUDY METHODS                                   |                    |                 |
|                                                                         | N MC     | N LC | N CC | Time retained between start drug and diagnosis of MC | Clinical remission at drug discontinuation | Histological remission at drug discontinuation | Positive reintroduction test | Drug                                            | MC case definition | Quality rating* |
| Beaugerie (1994, France)                                                | 3        | 1    | 0    | 2 weeks                                              | yes                                        | yes                                            | yes                          | Ruscus aculeatus and hespéridine méthylchalcone | yes                | Good            |
| Beaugerie (1995, France)                                                | 1        | 1    | 0    | 2 months                                             | yes                                        | yes                                            | yes                          | Ranitidine                                      | yes                | Good            |
| Macaigne (2002, France)                                                 | 1        | 1    | 0    | 4 weeks                                              | yes                                        | yes                                            | NA                           | Oxetorone                                       | yes                | Good            |
| Fathallah (2010, Tunisie)                                               | 1        | 1    | 0    | 2 weeks                                              | yes                                        | yes                                            | NA                           | Oxetorone                                       | yes                | Good            |
| Brigot (1998, France)                                                   | 1        | 1    | 0    | 3.5 months                                           | yes                                        | yes                                            | NA                           | Ticlopidine                                     | yes                | Good            |
| Duncan (1997, UK)                                                       | 1        | 0    | 1    | NA                                                   | yes                                        | NA                                             | NA                           | Cimetidine                                      | yes                | Good            |
| Pierrugues (1996, France)                                               | 4        | 4    | 0    | NA                                                   | yes                                        | NA                                             | NA                           | Cyclo3 Fort                                     | yes                | Good            |
| Chauveau (1998, France)                                                 | 1        | 1    | 0    | 2 weeks                                              | yes                                        | yes                                            | NA                           | Vinburnine                                      | yes                | Good            |
| Mennecier (2001, France)                                                | 1        | 1    | 0    | NA                                                   | yes                                        | no                                             | NA                           | Rustacea flavonoid extract                      | yes                | Good            |
| Fuste (2000, Spain)                                                     | 1        | 1    | 0    | NA                                                   | yes                                        | yes                                            | NA                           | Ticlopidine                                     | yes                | Good            |
| Larzillere (1999, France)                                               | 1        | 1    | 0    | 4 months                                             | yes                                        | NA                                             | NA                           | Ticlid                                          | yes                | Good            |
| Macaigne (2008, France)                                                 | 1        | 1    | 0    | 2 months                                             | yes                                        | yes                                            | NA                           | Esbeviren (meililot + rutoside)                 | yes                | Good            |
| Lim (2008, France)                                                      | 1        | 1    | 0    | 1 month                                              | yes                                        | yes                                            | NA                           | Lévodopa / Bensérazide                          | yes                | Good            |
| Thiolet (2003, France)                                                  | 1        | 1    | 0    | NA                                                   | yes                                        | no                                             | no                           | Cyclo3 Fort                                     | yes                | Good            |
| Maroy (2010, France)                                                    | 1        | 1    | 0    | 2 months                                             | yes                                        | yes                                            | NA                           | Carbamazepine                                   | yes                | Good            |
| Mennecier (1999, France)                                                | 1        | 1    | 0    | 8 days                                               | yes                                        | NA                                             | NA                           | Piroxicam fl-cyclodextrin                       | yes                | Good            |
| Macaigne (2001, France)                                                 | 1        | 0    | 1    | 2 months                                             | yes                                        | yes                                            | NA                           | Lansoprazole                                    | yes                | Good            |
| Bouvet (1998, France)                                                   | 1        | 1    | 0    | 1 month                                              | yes                                        | yes                                            | NA                           | Ticlopidine                                     | yes                | Good            |
| Hilmer (2006, Australia)                                                | 3        | 1    | 0    | 2 months                                             | yes                                        | NA                                             | NA                           | Lansoprazole                                    | yes                | Good            |
| Swine (1998, Belgique)                                                  | 3        | 1    | 0    | 4 weeks                                              | yes                                        | NA                                             | NA                           | Ticlopidine                                     | yes                | Good            |
|                                                                         |          | 1    | 0    | 5 weeks                                              | yes                                        | NA                                             | NA                           | Ticlopidine                                     |                    |                 |
|                                                                         |          | 1    | 0    | 9 weeks                                              | yes                                        | NA                                             | NA                           | Ticlopidine                                     |                    |                 |
| Wilcox (2002)                                                           | 1        | 0    | 1    | < 1 week                                             | yes                                        | yes                                            | yes                          | Lansoprazole                                    | NA                 | Moderate        |
| Feurle (1999)                                                           | 1        | 1    | 0    | NA                                                   | yes                                        | NA                                             | NA                           | Ticlopidine                                     | yes                | Good            |
| Mennecier (1999)                                                        | 1        | 1    | 0    | 8 days                                               | yes                                        | NA                                             | NA                           | Piroxicam beta-cyclodextrina                    | yes                | Good            |
| Riddel (1992)                                                           | 19       | 0    | 19   | 6 months to 15 years                                 | NA                                         | NA                                             | NA                           | NSAIDs                                          | yes                | Good            |
| Maroy (2008)                                                            | 3        | 1    | 0    | 14 weeks                                             | yes                                        | No                                             | yes                          | Entacapone                                      | yes                | Moderate        |
| Linares Torres (2000)                                                   | 1        | 1    | 0    | NA                                                   | yes                                        | NA                                             | NA                           | Carbamazepine                                   | yes                | Good            |
| Macaigne (2004)                                                         | 1        | 1    | 0    | 6 weeks                                              | yes                                        | yes                                            | NA                           | Saponifiable soy                                | yes                | Good            |
| Dharancy (2000)                                                         | 1        | 1    | 0    | 1 month                                              | yes                                        | yes                                            | NA                           | Ruscus aculeatus and hespéridine méthylchalcone | yes                | Good            |
| Bouchet (1997)                                                          | 1        | 1    | 0    | 2 weeks                                              | yes                                        | NA                                             | NA                           | Tardyferon                                      | yes                | Good            |
| Maroy (2009)                                                            | 1        | 1    | 0    | 3 weeks                                              | yes                                        | yes                                            | yes                          | Efitoxine                                       | yes                | Good            |
| Piche (2000)                                                            | 1        | 1    | 0    | 4 weeks                                              | yes                                        | yes                                            | yes                          | Acarbose                                        | yes                | Good            |
| Rassiat (2000)                                                          | 1        | 1    | 0    | 3 months                                             | yes                                        | NA                                             | NA                           | Lévodopa / Bensérazide                          | NA                 | Moderate        |
| Ghilain (2000)                                                          | 2        | 1    | 0    | 6 weeks                                              | yes                                        | yes                                            | NA                           | Lansoprazole                                    | yes                | Good            |
| Rosa (1999)                                                             | 1        | 1    | 0    | 2 weeks                                              | yes                                        | yes                                            | NA                           | Ticlopidine                                     | yes                | Good            |
| Kusnik (2009)                                                           | 1        | 1    | 0    | 4 weeks                                              | yes                                        | NA                                             | NA                           | Duloxetine                                      | yes                | Good            |
| Pelizza (2007)                                                          | 1        | 1    | 0    | 3 months                                             | yes                                        | yes                                            | yes                          | Clozapine                                       | yes                | Good            |
| Berrebi (1998)                                                          | 9        | 9    | 0    | 3 to 8 weeks                                         | yes for 9                                  | yes 5/5 tested                                 | NA                           | Ticlopidine                                     | yes                | Good            |
| Thomson (2002)                                                          | 6        | nd   | 0    | 1 month                                              | yes                                        | yes                                            | NA                           | Lansoprazole                                    | NA                 | Moderate        |

## Data extraction sheet – PICO 08 b. Drug withdrawal

| PICO8: Shoul any drug, potentially related to MC onset, been withdrawn? |          |      |      |                                                      |                                            |                                                |                              |                                                 |                    |                 |
|-------------------------------------------------------------------------|----------|------|------|------------------------------------------------------|--------------------------------------------|------------------------------------------------|------------------------------|-------------------------------------------------|--------------------|-----------------|
| STUDIES                                                                 | PATIENTS |      |      | DRUG INTAKE                                          |                                            |                                                |                              | STUDY METHODS                                   |                    |                 |
| Fisrt Author (year)                                                     | N MC     | N LC | N CC | Time retained between start drug and diagnosis of MC | Clinical remission at drug discontinuation | Histological remission at drug discontinuation | Positive reintroduction test | Drug                                            | MC case definition | Quality rating* |
| Bouaniche (1996)                                                        | 1        | 1    | 0    | 1 month                                              | yes                                        | yes                                            | NA                           | Ruscus aculeatus and hespéridine méthylchalcone | yes                | Good            |
| Gwillim (2012)                                                          | 1        | 1    | 1    | 6 weeks                                              | yes                                        | NA                                             | NA                           | Duloxetine                                      | yes                | Moderate        |
| Kitagawa (2013)                                                         | 1        | 0    | 1    | 5 months                                             | yes                                        | yes                                            | NA                           | Lansoprazole                                    | NA                 | Moderate        |
| Simsek (2007)                                                           | 2        | 2    | 0    | 1 week                                               | yes                                        | yes                                            | NA                           | Lansoprazole                                    | yes                | Good            |
| Al-Ghamdi (2002)                                                        | 1        | 0    | 1    | 4 weeks                                              | yes                                        | yes                                            | NA                           | Diclofenac/ketoprofen                           | yes                | Good            |
| Capurso (2011)                                                          | 8        | 0    | 1    | 4 weeks                                              | yes                                        | NA                                             | NA                           | Lansoprazole                                    | NA                 | Moderate        |
| Rammer (2005)                                                           | 1        | 0    | 1    | 1 month                                              | yes                                        | yes                                            | NA                           | Lansoprazole                                    | yes                | Good            |
| Milman (2015)                                                           | 1        | 0    | 1    | 3 days                                               | no                                         | NA                                             | NA                           | Diclofenac                                      | NA                 | Moderate        |
| Chiba (2009)                                                            | 1        | 0    | 1    | 6 months                                             | yes                                        | yes                                            | yes (clinical)               | Lansoprazole                                    | yes                | Good            |
| Ranjit (2015)                                                           | 1        | 1    | 0    | 2 weeks                                              | yes                                        | NA                                             | NA                           | Sertraline                                      | NA                 | Moderate        |
| Yagi (2001)                                                             | 1        | 0    | 1    | 6 years (aspirine)                                   | yes                                        | yes (ticlid)                                   | NA                           | Aspirine-ticlopidine                            | yes                | Moderate        |
| Verschueren (2005)                                                      | 1        | 0    | 1    | 2 years                                              | yes                                        | NA                                             | NA                           | Leflunomide                                     | NA                 | Moderate        |
| Sawada (2010)                                                           | 1        | 0    | 1    | 6 yeas                                               | yes                                        | yes                                            | NA                           | Lansoprazole                                    | yes                | Good            |
| Salter (2017)                                                           | 1        | 1    | 0    | 8 weeks                                              | yes                                        | NA                                             | NA                           | Duloxetine                                      | NA                 | Moderate        |
| Ozeki (2013)                                                            | 1        | 0    | 1    | < 6 months                                           | yes                                        | yes                                            | NA                           | Lansoprazole                                    | yes                | Good            |
| Nomura (2010)                                                           | 1        | 0    | 1    | 4 months                                             | yes                                        | NA                                             | NA                           | Lansoprazole                                    | NA                 | Good            |
| Gugenberger (2008)                                                      | 1        | 1    | 0    | 6 weeks                                              | yes                                        | NA                                             | NA                           | Leflunomide                                     | yes                | Good            |
| Wilcox (2009)                                                           | 4        | 0    | 1    | <6 months                                            | yes                                        | NA                                             | NA                           | Esomeprazole                                    | no                 | Good            |
|                                                                         |          | 1    | 0    | 4.5 years                                            | yes                                        | yes                                            | NA                           | Omeprazole                                      | NA                 | Good            |
|                                                                         |          | 0    | 1    | 3.5 years                                            | yes                                        | yes                                            | NA                           | Esomeprazole                                    | NA                 | Good            |
|                                                                         |          | 0    | 1    | 2 months                                             | yes                                        | NA                                             | yes (clinical)               | Omeprazole                                      | NA                 | Good            |
| Chande (2007)                                                           | 2        | 0    | 2    | 6 weeks                                              | yes                                        | yes                                            | NA                           | Lansoprazole                                    | NA                 | Good            |
| Nielsen (2013)                                                          | 1        | 1    | 0    | NA                                                   | yes                                        | NA                                             | NA                           | Olmesartan                                      | yes                | Moderate        |
| Mukherjee (2003)                                                        | 1        | 1    | 0    | 4 weeks                                              | yes                                        | yes                                            | NA                           | Lansoprazole                                    | no                 | Moderate        |
| Murasawa (2015)                                                         | 1        | 0    | 1    | 6 months                                             | yes                                        | NA                                             | NA                           | Rabeprazole                                     | yes                | Good            |
| Giardello (1990)                                                        | 2        | 0    | 1    | 2 months                                             | yes                                        | NA                                             | NA                           | Indometacine                                    | yes                | Good            |
|                                                                         |          | 0    | 1    | 2 months                                             | after oral classic cortic                  | yes                                            | NA                           | Ibuprofene                                      | yes                | Moderate        |
| Umeno (2013)                                                            | 1        | 0    | 1    | NA                                                   | yes                                        | NA                                             | NA                           | Lansoprazole                                    | no                 | Moderate        |

## Data extraction sheet – PICO 09: Adenoma CCR

| PICO9: Should MC patients require a special programme for colonoscopy surveillance to rule out colorectal cancer compared to general population? |      |                                                       |                 |      |                              |                 |      |                              |                 |            |                                    |                       |                                                                                        |                                                         |                        |                                                        |                        |               |                           |                 |
|--------------------------------------------------------------------------------------------------------------------------------------------------|------|-------------------------------------------------------|-----------------|------|------------------------------|-----------------|------|------------------------------|-----------------|------------|------------------------------------|-----------------------|----------------------------------------------------------------------------------------|---------------------------------------------------------|------------------------|--------------------------------------------------------|------------------------|---------------|---------------------------|-----------------|
| STUDIES                                                                                                                                          |      | COLONIC ADENOMA AND/OR NEOPLASIA RISK IN STUDY GROUPS |                 |      |                              |                 |      |                              |                 |            |                                    |                       |                                                                                        |                                                         |                        |                                                        |                        | STUDY METHODS |                           |                 |
| First Author (year, Country)                                                                                                                     | N MC | N Colonic adenomas in MC (%)                          | N CRC in MC (%) | N CC | N Colonic adenomas in CC (%) | N CRC in CC (%) | N LC | N Colonic adenomas in LC (%) | N CRC in LC (%) | N Controls | N Colonic adenomas in controls (%) | N CRC in controls (%) | OR(95%CI) or P value for colonic adenoma in MC                                         | OR(95%CI) or P value for CRC in MC versus control group | Mean FU of MC patients | Controls type                                          | N of total colonoscopy | Study type    | Retrospective/Prospective | Quality rating* |
| Chan (1999, USA)                                                                                                                                 | 0    | NA                                                    | NA              | 117  | NA                           | 0               | 0    | NA                           | NA              | NA         | NA                                 | 22                    | 0.52 (95% CI: 0.05-1.5)                                                                | RR 0.52 [95% CI: 0.05-1.5], P=NS                        | 7 years                | General population                                     | NA                     | Case series   | Retrospective             | Good            |
| Coyne (2014, UK)                                                                                                                                 | 10   | 10 (100%)                                             | NA              | 7    | 7 (100%)                     | NA              | 3    | 3 (100%)                     | NA              | include    | NA                                 | NA                    | NA                                                                                     | NA                                                      | NA                     | Not included                                           | NA                     | Cohort        | Retrospective             | Poor            |
| Fernández-Bañares (2016, Spain)                                                                                                                  | 100  | 15%                                                   | 0 (0%)          | NA   | NA                           | NA              | NA   | NA                           | NA              | 288        | 53 (18.5%)                         | 1 (0.3%)              | 0.76 (95% CI 0.4-1.5), P=NS                                                            | 0.26 (95% CI: 0.08-0.85), P=NS                          | NA                     | Chronic diarrhea and population of screening programme | NA                     | Case series   | Retrospective             | Good            |
| Gentile (2014, USA)                                                                                                                              | 182  | NA                                                    | 2 (1.1%)        | 78   | NA                           | 1 (1.3%)        | 104  | NA                           | 1 (0.96%)       | include    | NA                                 | NA                    | NA                                                                                     | NA                                                      | NA                     | Not included                                           | NA                     | Prevalence    | Retrospective             | Poor            |
| Kao (2009, USA)                                                                                                                                  | 547  | NA                                                    | 10 (1.8%)       | 171  | NA                           | 1 (0.6%)        | 376  | NA                           | 0 (0%)          | 547        | NA                                 | NA                    | NA                                                                                     | NA                                                      | NA                     | Normal population                                      | NA                     | Case-control  | Retrospective             | Moderate        |
| Levy (2019, USA)                                                                                                                                 | 221  | 79 (35.7%)                                            | 9 (4.1%)        | 112  | NA                           | NA              | 109  | NA                           | NA              | 306        | 121 (39.5%)                        | 10 (3.3%)             | 1.07 [95% CI 0.69–1.66] p<0.005                                                        | 0.83 (95% CI 0.20–3.39)                                 | 3.5 years              | Screening and surveillance programme                   | 306                    | Case-control  | Retrospective             | Good            |
| McPhaul (2013, USA)                                                                                                                              | 9521 | NA                                                    | NA              | 4183 | 285 (6.8%)                   | NA              | 4784 | 588 (12.3%)                  | NA              | 104,44     | 20783 (19.9%)                      | NA                    | 0.57 (95%ci: 0.52-0.62, p<0.0001 for LC and 0.30 (95% CI : 0.26-0.33, p<0.0001) for CC | NA                                                      | NA                     | Chronic diarrhea                                       | NA                     | Case series   | Retrospective             | Moderate        |
| Mellander (2016, Sweden)                                                                                                                         | 795  | 42 (5.3%)                                             | NA              | 341  | NA                           | NA              | 453  | NA                           | NA              | include    | NA                                 | NA                    | NA                                                                                     | NA                                                      | NA                     | Not included                                           | NA                     | Cohort        | Retrospective             | Moderate        |
| Mills (1993, Georgia)                                                                                                                            | 36   | 11 (30.6%)                                            | 0               | 0    | NA                           | NA              | 33   | 11 (33.3%)                   | 0               | 0          | NA                                 | NA                    | NA                                                                                     | NA                                                      | NA                     | Not included                                           | NA                     | Cohort        | Retrospective             | Poor            |
| Tontini (2014, Italy)                                                                                                                            | 43   | 2 (4.6%)                                              | 0               | 30   | 1 (3.3%)                     | 0               | 13   | 1 (7.6%)                     | 0               | 201        | 36 (17.9%)                         | 8 (2.6%)              | NA                                                                                     | 0.22 (95% CI: 0.05–0.97), p=0.035                       | NA                     | Chronic diarrhea                                       | 8006                   | Case series   | Prospective               | Good            |
| Yen (2011, USA)                                                                                                                                  | 647  | 121 (18.7%)                                           | 12 (1.9%)       | 261  | 40 (15.3%)                   | 5 (1.9%)        | 386  | 81 (21.0%)                   | 7 (1.8%)        | 647        | 217 (33.5%)                        | 27 (4.2%)             | 0.46 (95% CI: 0.35–0.59), p<.0001                                                      | 0.43 (95% CI: 0.22–0.86), p=0.018                       | 147                    | Surveillance programme                                 | 991                    | Case series   | Retrospective             | Good            |



### Workgroup 3:

### Data extraction sheet - PICO 01 a. Symptoms

| PICO 01: What are the symptoms of MC? |        |             |                 |            |       |      |      |            |             |            |               |             |             |              |             |              |              |              |            |
|---------------------------------------|--------|-------------|-----------------|------------|-------|------|------|------------|-------------|------------|---------------|-------------|-------------|--------------|-------------|--------------|--------------|--------------|------------|
| Author                                | Period | Country     | Study Type      | N tot      | N MC  | N CC | N LC | N CIs      | Sex         | Mean Age   | % Diarrhea    | % Urgency   | % Incontin. | % Abd Pain   | % Bloating  | % Weight L.  | % Noctur. S. | %Acute onset | %Constip.  |
| Bjørnbak C (2011)                     | 99-10  | Denmark     | prosp + retro   | 539        | 539   | 270  | 168  | 0          | F70%        | 65/63      | 90(340/376)   | 72(122/170) | 39(60/152)  | 50(160/322)  | .           | 55(185/339)  | 51(85/168)   | .            | .          |
| Bohr J (1996)                         | 89-95  | Sweden      | retro CS        | 163        | 163   | 163  | 0    | 0          | F87%        | 55(18-87)  | 100(163/163)  | .           | .           | 41(62/163)   | .           | 42(64/163)   | 27(41/163)   | 42(48/163)   | .          |
| Calabrese (2011)                      | n.a.   | Italy       | posthoc of RCT  | 54         | 54    | 35   | 19   | 0          | F76%        | 40(19-68)  | 100(54/54)    | 69(37/54)   | 22(12/54)   | 28(15/54)    | .           | .            | 33(18/54)    | 69(37/54)    | .          |
| Chande N (2005)                       | 92-02  | Canada      | retro CS        | 104        | 101   | 66   | 35   | 0          | F82%        | 64 (26-88) | 95(96/101)    | 29(29/101)  | 16 (16/101) | 40(40/101)   | 7 (7/101)   | 42(42/101)   | 23(23/101)   | .            | .          |
| Cotter TG (2018)                      | 06-12  | USA         | prosp CS        | 162        | 162   | 80   | 82   | 0          | F74%        | 66(57-73)  | 100(162/162)  | 90(146/162) | 62(101/162) | 65(105/62)   | .           | 52(84/162)   | 67(97/162)   | .            | .          |
| Fumery M (2017)                       | 05-07  | France      | prosp CS        | 130        | 130   | 87   | 43   | 0          | F3.5/1      | 63 (17-90) | 93(119/128)   | .           | 7(7/97)     | 47(61/129)   | .           | .            | .            | .            | .          |
| Guagnozzi D (2012)                    | 08-10  | Spain       | prosp CS        | 271        | 32    | 2    | 30   | 234        | F53%        | 50±21.8    | 100(32/32)    | .           | .           | 12(4/32)     | .           | 16(5/32)     | .            | .            | .          |
| Jobse P (2009)                        | 15 y   | Netherland  | retro CS        | 83         | 83    | 83   | 0    | 0          | F80%        | 60(20-87)  | 97(81/83)     | .           | .           | 55(46/83)    | .           | 35(29/83)    | 17(14/83)    | .            | .          |
| Kane JS (2017)                        | 10-15  | UK          | retro CS        | 540        | 540   | 291  | 203  | 0          | F70%        | 64.9(±12)  | 53(286/540)   | .           | .           | 22(120/540)  | .           | 28 (152/540) | 13(69/540)   | .            | .          |
| Kane JS (2016)                        | 14-15  | UK          | prosp CS        | 242        | 26    | 14   | 12   | 216        | F88%        | 62.5(±10)  | 100(26/26)    | .           | .           | 53(14/26)    | .           | 54(14/26)    | 77(20/26)    | .            | .          |
| Koskela RM (2004)                     | 90-99  | Finland     | retro+prosp     | 168        | 84    | 30   | 54   | 84         | F66/18      | 54.8(±13)  | 94(79/84)     | .           | 51(43/84)   | 94(79/84)    | 81 (68/84)  | 68(57/84)    | 60(50/84)    | 39(33/84)    | .          |
| Macaigne G (2014)                     | 10-12  | France      | prosp CS        | 433        | 129   | 87   | 42   | 304        | F74%        | 61(±18.8)  | 100(129/129)  | .           | .           | 53(69/129)   | .           | 48(62/129)   | 41(53/129)   | .            | .          |
| Madisch A (2014)                      | 98-04  | Germany     | prosp CS        | 494        | 494   | 287  | 207  | 0          | F76%        | 65/61      | 90(444/494)   | .           | .           | 24(118/494)  | .           | 49(240/494)  | 63(310/494)  | .            | .          |
| Maye A (2018)                         | n.a.   | Switzerland | retro CS        | 200        | 200   | 81   | 108  | 0          | F76%        | 63.5(±14)  | 100           | .           | .           | 32(64/200)   | .           | 30(61/200)   | .            | .            | .          |
| Mellander MR (2016)                   | 80-10  | Sweden      | retro CS        | 795        | 795   | 344  | 451  | 0          | F76%        | 61(13-97)  | 94(745/795)   | 22(45/204)  | .           | 29(128/442)  | .           | 35(170/481)  | 23(63/279)   | .            | .          |
| Nyhlin N (2014)                       | 98-08  | Sweden      | case control    | 839        | 212   | 115  | 97   | 627        | F83%        | 66/64      | 43/47%        | .           | 36(77/212)  | 50(106/212)  | .           | .            | 15(31/212)   | .            | .          |
| O'Toole A (2014)                      | 93-10  | Ireland     | retro CS        | 222        | 222   | 123  | 99   | 0          | F170/52     | 64(32-90)  | 98(218/222)   | .           | 8(18/222)   | 24(53/222)   | .           | 10(22/222)   | .            | .            | .          |
| Olesen M (2004)                       | n.a.   | Sweden      | retro CS        | 199        | 199   | 0    | 199  | 0          | F2.4/1      | 59(48-70)  | 96(191/199)   | .           | 9(18/199)   | 47(93/199)   | 11 (21/199) | 41(82/199)   | 39(77/199)   | 25(50/199)   | .          |
| Porras Perez FP (2012)                | 2009   | UK          | retro CS        | 49         | 49    | 34   | 15   | 0          | F38/11      | 66(34-90)  | 100(49/49)    | .           | 8(4/49)     | 24(12/49)    | .           | 6(3/49)      | .            | .            | .          |
| Rubio-Tapia A                         | 95-05  | Mexico      | retro CS        | 26         | 26    | 10   | 16   | 0          | F1.8/1      | 56(26-85)  | 100(26/26)    | .           | .           | 69(18/26)    | .           | 84(22/26)    | .            | .            | .          |
| Sifuentes GWA (2015)                  | 99-14  | Spain       | retro CS        | 97         | 97    | 29   | 61   | 0          | F2.1/1      | 66(15-88)  | 95(92/97)     | 7(7/97)     | .           | 44(43/97)    | .           | 51(50/97)    | 13(13/97)    | .            | .          |
| Silva M (2017)                        | 08-15  | Portugal    | retro obs.      | 25         | 25    | 13   | 12   | 0          | F54%        | 67(22-83)  | 96(24/25)     | .           | .           | 44(11/25)    | .           | 44(11/25)    | .            | .            | .          |
| Sonnenberg A (2013)                   | 08-11  | USA         | retro CS        | 789<br>568 | 8 745 | 3760 | 4460 | 780<br>823 | F72-<br>82% | 63/66      | 84(7379/8745) | .           | .           | 10(880/8745) | .           | 6(542/8745)  | .            | .            | 1(97/8745) |
| Svensson M (2018)                     | 2016   | Sweden      | cross sectional | 211        | 200   | 75   | 125  | 9          | F70%        | 66(21-90)  | 99(198/200)   | .           | 2(4/200)    | 12(23/200)   | .           | 24(48/200)   | .            | .            | .          |
| Verhaegh B (2017)                     | ?-17   | Europe      | prosp. registry | 193        | 193   | 87   | 79   | 0          | F69%        | 65±14      | 43            | 80(154/193) | 48(93/193)  | 48(93/193)   | .           | .            | 46(89/193)   | .            | .          |

## Data extraction sheet – PICO 01 b. Symptoms

| PICO 01: What are the symptoms of MC? |                  |                   |                  |                   |                  |                 |                  |                    |                   |               |                                                                       |
|---------------------------------------|------------------|-------------------|------------------|-------------------|------------------|-----------------|------------------|--------------------|-------------------|---------------|-----------------------------------------------------------------------|
| Author                                | Apprpr. Sampling | Apprpr. Recruitm. | Adequate S. Size | Setting described | Apprpr. Coverage | Proper Dignosis | Reliable Measure | Apprpr. Statistics | Adequate Response | Study Quality | Comments                                                              |
| Bjørnbak C (2011)                     | yes              | yes               | yes              | yes               | N/A              | yes             | yes              | yes                | N/A               | high          | 101 pts with MCI included                                             |
| Bohr J (1996)                         | no               | no                | yes              | no                | N/A              | yes             | yes              | N/A                | N/A               | moderate      | only CC patients included                                             |
| Calabrese (2011)                      | no               | no                | no               | no                | N/A              | yes             | yes              | yes                | N/A               | low           |                                                                       |
| Chande N (2005)                       | no               | no                | no               | no                | N/A              | yes             | yes              | N/A                | N/A               | low           | 3 patients with both CC and LC                                        |
| Cotter TG (2018)                      | no               | yes               | yes              | no                | N/A              | yes             | yes              | yes                | N/A               | moderate      | MCDAI, frequency of diarrhea not stated, but it is assumed to be 100% |
| Fumery M (2017)                       | yes              | yes               | yes              | yes               | N/A              | yes             | yes              | yes                | N/A               | high          |                                                                       |
| Guagnozzi D (2012)                    | yes              | yes               | no               | no                | N/A              | yes             | yes              | N/A                | N/A               | moderate      | consecutive pts referred for diarrhea                                 |
| Jobse P (2009)                        | unclear          | no                | no               | yes               | N/A              | no              | no               | N/A                | N/A               | low           | 15 consecutive yrs from pathology DB                                  |
| Kane JS (2017)                        | yes              | yes               | yes              | yes               | N/A              | yes             | yes              | yes                | N/A               | high          | 46 patients with MCI included                                         |
| Kane JS (2016)                        | yes              | yes               | no               | yes               | N/A              | yes             | yes              | yes                | N/A               | high          | cons. pts with diarrhea: MC Vs notMC                                  |
| Koskela RM (2004)                     | yes              | no                | no               | yes               | N/A              | yes             | yes              | yes                | N/A               | low           | retrospective (pathology based) and prospective design                |
| Macaigne G (2014)                     | yes              | yes               | yes              | yes               | N/A              | yes             | yes              | yes                | N/A               | high          | consecutive pts referred for diarrhea, MC vs FBD-D                    |
| Madisch A (2014)                      | no               | no                | yes              | no                | N/A              | yes             | yes              | yes                | N/A               | moderate      | data results section vs data table not fitting                        |
| Maye A (2018)                         | no               | yes               | yes              | no                | N/A              | unclear         | unclear          | unclear            | N/A               | very low      | 11 patients with MCI, conference ABR                                  |
| Mellander MR (2016)                   | no               | no                | yes              | no                | N/A              | yes             | no               | yes                | N/A               | low           | some symptoms plotted on diagram without exact%                       |
| Nyhlin N (2014)                       | yes              | yes               | yes              | no                | N/A              | yes             | yes              | yes                | N/A               | high          | questionnaire-based case control study: outcome of symptoms and QoL   |
| O'Toole A (2014)                      | yes              | no                | yes              | yes               | N/A              | yes             | yes              | N/A                | N/A               | moderate      |                                                                       |
| Olesen M (2004)                       | yes              | yes               | yes              | no                | N/A              | no              | yes              | yes                | N/A               | moderate      | retro CS on patients with LC                                          |
| Porras Perez FP (2012)                | no               | no                | no               | no                | N/A              | unclear         | unclear          | N/A                | N/A               | very low      | 6-month histopathological report-based case review, conference ABR    |
| Rubio-Tapia A (2007)                  | no               | no                | no               | no                | N/A              | yes             | yes              | yes                | N/A               | low           | retro CS, 26 cases, all with diarrhea                                 |
| Sifuentes GWA (2015)                  | no               | no                | no               | no                | N/A              | unclear         | unclear          | unclear            | N/A               | low           | 7 pts with LC-CC overlap, conference ABR                              |
| Silva M (2017)                        | no               | no                | no               | no                | N/A              | unclear         | unclear          | unclear            | N/A               | very low      |                                                                       |
| Sonnenberg A (2013)                   | no               | no                | yes              | no                | N/A              | yes             | yes              | yes                | N/A               | low           | computer-based DB: 8745MC, 525(6%) MCI                                |
| Svensson M (2018)                     | yes              | no                | yes              | yes               | N/A              | yes             | yes              | yes                | N/A               | moderate      | 2 MCI included, histopathological report-based case review            |
| Verhaegh B (2017)                     | no               | no                | yes              | no                | N/A              | unclear         | unclear          | unclear            | N/A               | low           | 27 pts with MCI included                                              |



## Data extraction sheet – PICO 03 Quality of Life

| PICO 03: Is the patient health-related quality of life affected by MC ? |               |          |          |      |          |            |                                 |                                  |                     |                       |                    |                                                                  |                    |                              |                                  |                                            |                        |               |                    |                                                                                    |                                                                                                                                      |
|-------------------------------------------------------------------------|---------------|----------|----------|------|----------|------------|---------------------------------|----------------------------------|---------------------|-----------------------|--------------------|------------------------------------------------------------------|--------------------|------------------------------|----------------------------------|--------------------------------------------|------------------------|---------------|--------------------|------------------------------------------------------------------------------------|--------------------------------------------------------------------------------------------------------------------------------------|
| Author (Year, Country)                                                  | Study Type    | N tot    | N MC     | N CC | N LC     | N Controls | Sex                             | Mean Age                         | LowQoL in active MC | LowQoL in inactive MC | QoL better with Tx | Symptom-driven QoL severity                                      | Two groups similar | Exposures measured similarly | Exposure measured Valid/Reliable | Outcome measured                           | F-up time              | F-up complete | Apprpr. Statistics | Study Quality                                                                      | Remarks                                                                                                                              |
| Cotter T (2018, US)                                                     | Prosp         | 162      | 162      | 80   | 82       | 0          | F1.35/1                         | 66(57-63)                        | Yes                 | .                     | .                  | Unformed s, nocturn s, incontn, weight l,                        | .                  | yes                          | yes                              | IBDQ, SF-30                                | 8 weeks                | yes           | yes                | high                                                                               | MCDAI strongly predicted the PGA and correlated with a validated measure of QoL                                                      |
| Hjortswang H (2009, Sweden)                                             | CS            | 116      | 116      | 116  | 0        | 0          | F3.8/1                          | 62(55-73)                        | yes                 | no                    | .                  | s. frequency, watery s.                                          | .                  | yes                          | yes                              | SHS, PGWB, IBDQ, RFIPC                     | na                     | na            | yes                | high                                                                               | Severity of bowel symptoms had a deleterious impact on HRQOL of pts wit CC                                                           |
| Hjortswang H (2011, Sweden)                                             | CS            | 116+8931 | 116      | 116  | 0        | 8931       | F3.8/1                          | 62(55-73)                        | yes                 | .                     | .                  | s. frequency, watery s.                                          | no                 | yes                          | yes                              | SF-36, PGWB,IBDQ, RFIPC                    | na                     | na            | yes                | high                                                                               | HRQOL was significantly impaired in pts with CC compared to controls                                                                 |
| Kane JS (2018, UK)                                                      | CS            | 129      | 129      | 69   | 50       | .          | .                               | .                                | n.a                 | n.a.                  | .                  | fatigue, anxiety,depression, somatization                        | .                  | .                            | yes                              | HADS,PHQ15, SF-36, IBDF                    | .                      | yes           | yes                | high                                                                               | Significant correlation between fatigue severity and psychological comorbidities and impaired HRQOL                                  |
| Kane JS (2018, UK)                                                      | CS            | 151      | 151      | 78   | 59       | .          | F75%                            | 68                               | n.a                 | n.a.                  | .                  | IBS Roma III symptoms, anxiety, depression, somatization         | .                  | .                            | yes                              | IBS Roma III criteria, HADS, PHQ15, SF-36  | .                      | na            | yes                | high                                                                               | 1/3 of MC met diagnostic criteria for IBS and these reported higher levels of anxiety, depression, somatization. impaired HRQOL      |
| Madisch A (2005, Germany)                                               | RCT           | 51       | 51       | 29   | .        | 12         | .                               | .                                | yes                 | no                    | yes                | .                                                                | .                  | yes                          | GIQLI                            | 6 weeks                                    | yes                    | yes           | high               | HRQOL was severely reduced in CC pts; 6 wks Tx with oral budesinide improved HRQOL |                                                                                                                                      |
| Madisch A (2007, Germany)                                               | RCT           | 21       | 21       | 16   | .        | 15         | Bosw. F87% PCB                  | Boswellia 64; PCB 53             | yes                 | .                     | .                  | s. frequency and consistency                                     | .                  | yes                          | yes                              | SF-36                                      | 6 weeks                | yes           | yes                | low                                                                                | Boswellia serrata had no effects on HRQOL                                                                                            |
| Miehlike S (2008, Germany)                                              | RCT           | 48       | 48       | 23   | .        | 23         | F73%                            | 57.5(34-78)                      | yes                 | no                    | yes                | S.frequency&consistency, abd pain weight l., duration diarrhoea  | .                  | yes                          | yes                              | SF-36, IBDQ                                | 6 weeks                | 6 mo          | yes                | high                                                                               | HRQOL was impaired in CC pts; HRQOL Improvement was observed during 6 wks of Tx with Bude and during maintenance.                    |
| Miehlike S (2009, Germany)                                              | RCT           | 42       | 42       | .    | 21       | 21         | Bude F13; PCB F15               | Bude 61(36-80); PCB 61(23-76)    | yes                 | no                    | yes                | S.frequency&consistency, abd pain, weight l., duration diarrhoea | .                  | yes                          | yes                              | SF-36                                      | 6 weeks                | .             | yes                | high                                                                               | At baseline HRQOL was impaired in LC pts; Bude induced clinical remission and improved HRQOL in LC pts                               |
| Munch A (2016, Sweden)                                                  | RCT           | 110      | 110      | 44   | .        | 48         | Bude F4; PCB F10                | Bude 57, PCB 61                  | yes                 | no                    | yes                | Hjortswang criteria                                              | yes                | yes                          | yes                              | SHS, PGWBI                                 | 8wks induction + 52wks | .             | yes                | high                                                                               | Efficacy of Bude to induce clinical remission in CC pts and to improve HRQOL; efficacy of low dose Bude to maintain remission/HRQOL. |
| Munch A (2013, Sweden)                                                  | series        | 9        | 9        | 9    | MTX      | .          | F7                              | 62(44-77)                        | yes                 | no                    | yes                | Hjortswang criteria                                              | .                  | .                            | yes                              | SHS                                        | 12 weeks               | yes           | no                 | low                                                                                | In Bude refractory CC, MTX had no clinical effect nor improved HRQOL                                                                 |
| Munch A (2012, Sweden)                                                  | series        | 3        | 3        | 3    | ADA      | .          | F2                              | 45-74                            | yes                 | .                     | yes                | Hjortswang criteria                                              | .                  | .                            | yes                              | SHS, PGWBI                                 | 6 weeks                | yes           | no                 | low                                                                                | In Bude and MTX refractory CC, ADA appeared to be effective                                                                          |
| Nyhlin N (2014, Sweden)                                                 | Case Contr ol | 277+831  | 277      | 115  | 97       | 831        | .                               | .                                | yes                 | no                    | .                  | .                                                                | .                  | .                            | yes                              | SHS                                        | .                      | yes           | yes                | high                                                                               | HRQOL was impaired in CC and LC; in clinical remission, CC and LC suffer from abdominal pain, fatigue, arthralgia or myalgia.        |
| Roth B (2013, Sweden)                                                   | CS            | 158      | 158+2162 | .    | .        | 2162       | MC F 158; Controls F 2162       | MC 63(68-67); CTL 51 (19-94)     | yes                 | .                     | .                  | Severity of GI symptoms and psychological GWB                    | no                 | yes                          | yes                              | .GSRs, PGWBI, IBS Roma III criteria        | .                      | .             | yes                | low                                                                                | Smoking and IBS symptoms were associated with impaired GI symptoms and psychological well-being in MC                                |
| Roth B (2013, Sweden)                                                   | CS            | 158      | 158      | .    | .        | .          | F158                            | 63(27-73)                        | yes                 | .                     | .                  | GI sympoms severity, psychological GW-B                          | no                 | yes                          | yes                              | GSRs,PGWBI, VAS-IBS, IBS Rome III criteria | .                      | .             | yes                | low                                                                                | MC pts fulfilling IBS Roma III criteria experienced more GI symptoms and worse psychological well-being                              |
| Wildt S (2006, Denmark)                                                 | RCT           | 29       | 29       | 21   | Probi ot | 8          | Probiotic F/M 1/20 - PCB 1/7    | Probiotic 61 (3-73); PCB 57 (26- | yes                 | .                     | .                  | S. frequency&consistency, abdominal pain, blooting               | no                 | yes                          | yes                              | SIBDQ                                      | 12 weeks               | yes           | yes                | low                                                                                | Probiotic had no significant effects both on intestinal symptoms and HRQOL                                                           |
| Miehlike S (2018, Europe)                                               | RCT           | 57       | 57       | .    | 19       | 19         | Bude F 15; Mesalam. F 14; PCB F | Bude 61; Mesalam. 57; PCB 59     | yes                 | no                    | yes                | S.frequency&consistency, N.soos/day, N.watery s./day             | yes                | yes                          | yes                              | GIQLI, SHS                                 | 8 weeks                | yes           | yes                | high                                                                               | Bude was effective and safe for induction of clinical and histological remission in pts with LC, it also improved HRQOL.             |

## Data extraction sheet – PICO 04 Established Metrics to measure

| PICO 04: Are there established metrics to measure disease activity and severity in MC ? |            |       |      |      |      |        |       |              |                                                       |                   |                              |                                |                     |                    |                        |                  |                |                    |                          |                     |                  |                                                                                                                                                                                                                                                                                                                                                                                    |
|-----------------------------------------------------------------------------------------|------------|-------|------|------|------|--------|-------|--------------|-------------------------------------------------------|-------------------|------------------------------|--------------------------------|---------------------|--------------------|------------------------|------------------|----------------|--------------------|--------------------------|---------------------|------------------|------------------------------------------------------------------------------------------------------------------------------------------------------------------------------------------------------------------------------------------------------------------------------------------------------------------------------------------------------------------------------------|
| Author (Year, Country)                                                                  | Study Type | N tot | N MC | N CC | N LC | N CtIs | Sex F | Mean Age (r) | Score adopted/developed                               | Two group similar | Exposures measured similarly | Exposure measured Valid/Reliab | Confounding factors | Strategies to deal | Groups free of outcome | Outcome measured | Follow up time | Follow up complete | Strategies for incomp FU | Appropri statistics | Study Quality    | Comments                                                                                                                                                                                                                                                                                                                                                                           |
| Hjorstwang H (2009, Sweden)                                                             | CS         | 116   | 116  | 116  | 0    | 0      | 3.83  | 62(55-73)    | HC (a mean of <3 stools/day and <1 watery stool/day.) | na                | na                           | yes                            | 0                   | yes                | na                     | yes              | na             | na                 | na                       | yes                 | high             | this study defined clinical remission in CC based on symptoms only, the study conclusions received no external nor formal prospective validation but, the HC has been widely adopted in RCT (informal validation in clinical practice, as for the Mayo score in UC)                                                                                                                |
| Pardi D (2018, US)                                                                      | Prosp      | 162   | 162  | 80   | 82   | 0      | 1.35  | 66(57-63)    | MCDAl less or equal 1.32                              | na                | na                           | yes                            | yes                 | yes                | na                     | yes              | yes            | yes                | no                       | yes                 | high (very high) | adequately powered cohort, both CC and LC, diagnostic criteria confirmed within 3mo; compared to the HC, this incorporates factors apart from bowel movements (PROs), enables stratification according to disease severity (not only a binomial outcome on disease activity/remission). Not yet formally validated (externally and prospectively) nor used in RCT (up to Dec2019). |

## Workgroup 5:

### Data extraction sheet – PICO 5.1 Budesonide

| PICO 5.1: Is oral budesonide effective in inducing remission of MC ? |        |           |                                                     |             |         |                                                                |                              |                                                       |                 |                                                                              |              |         |                |         |                                                                       |
|----------------------------------------------------------------------|--------|-----------|-----------------------------------------------------|-------------|---------|----------------------------------------------------------------|------------------------------|-------------------------------------------------------|-----------------|------------------------------------------------------------------------------|--------------|---------|----------------|---------|-----------------------------------------------------------------------|
| Author (year)                                                        | Design | Diagnosis | Inclusion criteria                                  | N° patients |         | Budesonide<br>dosis, time and<br>Trade Mark                    | Clinical Remission           |                                                       | P-value         | Histological Response                                                        |              | p-value | Adverse events |         | Considerations                                                        |
|                                                                      |        |           |                                                     | Budesonide  | Placebo |                                                                | Budesonide                   | Placebo                                               |                 | Budesonide                                                                   | Placebo      |         | Budesonide     | Placebo |                                                                       |
| Baert (2002)                                                         | DB-RCT | CC        | Active watery diarrhoea<br>CC histological criteria | 14          | 14      | 9 mg/d, 8 weeks,<br>(Budenofalk caps)                          | 8 out of 11                  | 3 out of 12                                           | 0.05            | 13 out of 13                                                                 | 4 out of 12  | 0.001   | NA             | NA      |                                                                       |
| Bonderup (2003)                                                      | DB-RCT | CC        | Active watery diarrhoea<br>CC histological criteria | 10          | 10      | 9 mg/d, 4 weeks<br>and tapering until 8<br>wks (Entocort caps) | 10 out of 10                 | 2 out of 10                                           | <0.001          | Significant reduction<br>in lamina propia score<br>and collagen<br>thickness | No effect    | NA      |                |         |                                                                       |
| Miehlke (2002)                                                       | DB-RCT | CC        | Active watery diarrhoea<br>CC histological criteria | 26          | 25      | 9 mg/d, 6 weeks<br>(Entocort caps)                             | 20 out of 26                 | 3 out of 25                                           | <0.001          | 14 out of 25                                                                 | 1 out of 26  | <0.001  | 38,5           | 12      |                                                                       |
| Miehlke (2014)                                                       | DB-RCT | CC        | Active watery diarrhoea<br>CC histological criteria | 30          | 37      | 9 mg/d, 8 weeks,<br>(Budenofalk caps)                          | 24 out of 30<br>24 out of 30 | 22 out of 37<br>14 out of 37<br>(Hjorts.<br>Criteria) | 0.072<br>0.0006 | 20 out of 23                                                                 | 11 out of 22 | 0.01    | 0,47           | 0,54    | Mesalazine<br>group (n=25);<br>remission: 8/25<br>(p<0.001 vs<br>BUD) |
| Miehlke (2009)                                                       | DB-RCT | LC        | Active watery diarrhoea<br>LC histological criteria | 21          | 21      | 9 mg/d, 6 weeks,<br>(Budenofalk caps)                          | 18 out of 21                 | 10 out of 21                                          | 0.010           | 11 out of 15                                                                 | 4 out of 13  | 0.03    |                |         |                                                                       |
| Pardi (2009)                                                         | DB-RCT | LC        | NA                                                  | 11          | 4       | 9 mg/d, 8 weeks                                                | 10 out of 11                 | 1 out of 4                                            | 0.03            | 7 out of 8                                                                   | 1 out of 3   |         | NA             | NA      |                                                                       |
| Miehlke (2018)                                                       | DB-RCT | LC        | Active watery diarrhoea<br>LC histological criteria | 19          | 19      | 9 mg/d, 8 weeks,<br>(Budenofalk<br>granules)                   | 15 out of 19                 | 08 out of 19                                          | 0.010           | 13 out of 15                                                                 | 5 out of 14  | 0.008   | 47.4%          | 42.1%   | Mesalazine<br>group (n=19);<br>remission:<br>12/19 (p=NS vs<br>BUD)   |

## Data extraction sheet – PICO 5.2 Budesonide

| PICO 5.2: Is oral budesonide effective for maintaining remission of MC ? |        |           |                                       |             |         |                                                           |                    |             |         |                                  |             |         |                |              |                |
|--------------------------------------------------------------------------|--------|-----------|---------------------------------------|-------------|---------|-----------------------------------------------------------|--------------------|-------------|---------|----------------------------------|-------------|---------|----------------|--------------|----------------|
| Author (year)                                                            | Design | Diagnosis | Inclusion criteria                    | N° patients |         | Budesonide<br>dosis, time and<br>Trade Mark               | Clinical Remission |             | P-value | Histological Response maintained |             | p-value | Adverse events |              | Considerations |
|                                                                          |        |           |                                       | Budesonide  | Placebo |                                                           | Budesonide         | Placebo     |         | Budesonide                       | Placebo     |         | Budesonide     | Placebo      |                |
| Bonderup (2009)                                                          | DB-RCT | CC        | Budesonide-induced clinical remission | 17          | 17      | 6 mg/d, 24 weeks (Entocort caps)                          | 13 out of 17       | 2 out of 17 | <0.001  | 9 out of 10                      | 4 out of 11 |         | 5 out of 17    | 8 out of 17  |                |
| Miehlke (2008)                                                           | DB-RCT | CC        | Budesonide-induced clinical remission | 23          | 23      | 6 mg/d, 24 weeks (Entocort caps)                          | 17 out of 23       | 8 out of 23 | 0.022   | 14 out of 15                     | 5 out of 8  | 0.10    | 8 out of 23    | 8 out of 23  |                |
| Munch (2016)                                                             | DB-RCT | CC        | Budesonide-induced clinical remission | 44          | 48      | 3 and 6 mg on alternate days, 12 months (Budenofalk caps) | 27 out of 44       | 8 out of 48 | <0.001  | NA                               | NA          |         | 31 out of 44   | 24 out of 48 |                |

Data extraction sheet – PICO 5.3.2 Budesonide

| PICO 5.3.2: Is prolonged use of oral budesonide in MC associated with an increased risk of osteoporosis? |         |              |                    |                           |                                 |                                        |                                            |                             |                          |
|----------------------------------------------------------------------------------------------------------|---------|--------------|--------------------|---------------------------|---------------------------------|----------------------------------------|--------------------------------------------|-----------------------------|--------------------------|
| Author (year)                                                                                            | Country | Design       | Inclusion criteria | Nº patients               |                                 | Outcome: Osteoporotic fracture         |                                            | Adjusted odds ratio, 95% CI | Considerations           |
|                                                                                                          |         |              |                    | Cases = MC with fractures | Controls = MC without fractures | Cases exposed /unexposed to budesonide | controls exposed / unexposed to budesonide |                             |                          |
| Reilev, 2019                                                                                             | Denmark | case-control | MC in DK           | 9234                      | 1240                            | 309/108                                | 870/ 370                                   | 1.13 (0.88-1.47)            | Dose-respons association |

| Author (year) | Country | Design       | Inclusion criteria | Nº patients |                  | Outcome: Osteopenia and osteoporosis |                  | p-value | remarks                                   |
|---------------|---------|--------------|--------------------|-------------|------------------|--------------------------------------|------------------|---------|-------------------------------------------|
|               |         |              |                    | MC cases    | Healthy controls | MC cases                             | Healthy controls |         |                                           |
| Wildt, 2018   | Denmark | case-control | MC                 | 50          | 49               | 29/50                                | 19/49            | 0.06    | Budesonide dose associated with lower BMD |



## Data extraction sheet – PICO 5.5 Mesalazine

| PICO 5.5: Is there a role for mesalazine in MC ? |             |              |                                          |                               |                                                                |                                                                          |                                  |                                   |         |                                                                                  |
|--------------------------------------------------|-------------|--------------|------------------------------------------|-------------------------------|----------------------------------------------------------------|--------------------------------------------------------------------------|----------------------------------|-----------------------------------|---------|----------------------------------------------------------------------------------|
| First Author (Year)                              | Country     | Study Period | Study Type                               | Number of patients with MC    | Number of patients treated with mesalazine compounds / placebo | Number of patients treated with mesalazine / mesalazine + cholestyramine | Effect measurement               | Number treated with effect, N (%) | p-value | Considerations                                                                   |
| Miehlke 2014                                     | Germany     | 8 weeks      | DB-RCT                                   | 62 CC                         | 25/37                                                          |                                                                          | < 4 stools pr day                | 44% versus 38%                    | NS      | Included also effective budesonide arm                                           |
| Meihlke 2018                                     | Germany     | 8 weeks      | DB- RCT                                  | 38 LC                         | 19/19                                                          |                                                                          | Hjortswang criteria              | 63% versus 42%                    | NS      | Included also effective budesonide arm                                           |
| Calabrese 2006                                   | Italy       | 6 months     | Prospective randomised trial, open label | 64 (41 LC,23 CC)              |                                                                | 31 / 33                                                                  | Complete resolution of diarrhoea | 26 (84%) / 30 (91%)               |         | Very high remission rate in all patients !                                       |
| Bohr 1996                                        | Sweden      | 1989 - 1995  | retrospective cohort                     | 163 CC                        | 31 / 0                                                         |                                                                          | Improved symptoms                | 12 (39%)                          |         | Retrospective, dosage and treatment period unclear. Effect measurement undefined |
| Olesen 2004                                      | Sweden      |              | retrospective cohort                     | 199 LC                        | 33 / 0                                                         |                                                                          | Improved symptoms                | 15 (45%)                          |         | Retrospective, dosage and treatment period unclear. Effect measurement undefined |
| Bjørnbak 2011                                    | Denmark     | 2000 - 2010  | retrospective cohort                     | 549 (270 CC, 168 LC, 101 MCI) | 43/ 0                                                          |                                                                          | Improvement in diarrhoea         | 6 (14 %)                          |         | Retrospective, dosage and treatment period unclear. Effect measurement undefined |
| Jobse 2008                                       | Netherlands | 1992-2006    | retrospective, cross sectional           | 83 CC                         | 10 / 0                                                         |                                                                          | No diarrhoea complaints          | 8 (80%)                           |         | Retrospective, dosage and treatment period unclear. Effect measurement undefined |
| Colussi 2015                                     | US          | 2002-2013    | retrospective cohorte                    | 131 (76 CC, 55 LC)            | 19 LC / 0 CC / 0                                               | 23                                                                       | Resolution of diarrhoea          | 11 LC (58%)<br>12 CC (52%)        |         | Retrospective, dosage and treatment period unclear. Effect measurement undefined |
| Fernandez-Banares 2003                           | Spain       | 1992- 2001   | retrospective cohort                     | 81 (44 LC, 37 CC)             | 21 LC / 0 CC / 0                                               | 24                                                                       | Complete resolution of diarrhoea | 18 LC (86%)<br>10 CC (42%)        |         | Retrospective, dosage and treatment period unclear. Effect measurement undefined |
| Fiedler 2001                                     | US          | 1991 - 1994  | retrospective caseseries                 | 26 CC                         | 13 / 0                                                         |                                                                          | Normalisation of bowel function  | 5 (38%)                           |         | Retrospective, dosage and treatment period unclear. Effect measurement undefined |

**Data extraction sheet – PICO 5.5 Subsalisylate**

| PICO 5.5: Is there a role for bismuth subsalisylate in MC ? |         |              |                       |                            |                                         |                                                 |                                   |                 |                |                                                                                   |
|-------------------------------------------------------------|---------|--------------|-----------------------|----------------------------|-----------------------------------------|-------------------------------------------------|-----------------------------------|-----------------|----------------|-----------------------------------------------------------------------------------|
| First Author (Year)                                         | Country | Study Period | Study type            | Number of patients with MC | Number of patients treated with bismuth | Effect measurement                              | Number treated with effect, N (%) | Side effects, N | Quality rating | Considerations                                                                    |
| Pardi 2002                                                  | US      | 1997-1999    | Retrospective cohorte | 170 (LC)                   | 22                                      | Resolution of diarrhea                          | 23%                               | 2               | poor           | Retrospective. Dosage and treatment period unclear. Effect measurement undefined. |
| Fine 1998                                                   | US      |              | Open -label           | 6 LC, 7 CC                 | 13                                      | Passage of < 3 formed or semifformed stools/day | 11 (85%)                          | 1               | fair           | small sample size, open label, no placebo                                         |
| Culossi 2015                                                | US      | 2002-2013    | Retrospective cohorte | 131 (76 CC, 55 LC)         | 10 LC<br>21 CC                          | Resolution of diarrhea                          | 46% (LC)<br>64% (CC)              |                 | poor           | Retrospective, dosage and treatment period unclear. Effect measurement undefined  |

**Data extraction sheet – PICO 5.6 loperamide**

| PICO 5.6: Is there a role for loperamide in MC? |             |              |                                |                               |                                            |                                  |                                   |                                                                                  |
|-------------------------------------------------|-------------|--------------|--------------------------------|-------------------------------|--------------------------------------------|----------------------------------|-----------------------------------|----------------------------------------------------------------------------------|
| First Author (Year)                             | Country     | Study Period | Study Type                     | Number of patients with MC    | Number of patients treated with loperamide | Effect measurement               | Number treated with effect, N (%) | Considerations                                                                   |
| Bohr 1996                                       | Sweden      | 1989-1995    | retrospective cohort           | 163 CC                        | 69                                         | Improved symptoms                | 49 (71%)                          | Retrospective, dosage and treatment period unclear. Effect measurement undefined |
| Olesen 2004                                     | Sweden      |              | retrospective cohort           | 199 LC                        | 67                                         | Improved symptoms                | 47 (61%)                          | Retrospective, dosage and treatment period unclear. Effect measurement undefined |
| Bjørnbak 2011                                   | Denmark     | 2000 - 2010  | retrospective cohort           | 549 (270 CC, 168 LC, 101 MCi) | 77                                         | Improvement in diarrhoea         | 46 (60%)                          | Retrospective, dosage and treatment period unclear. Effect measurement undefined |
| Jobse 2008                                      | Netherlands | 1992-2006    | retrospective, cross sectional | 83 CC                         | 14                                         | No diarrhoea complaints          | 8 (57%)                           | Retrospective, dosage and treatment period unclear. Effect measurement undefined |
| Fernandez-Banares 2003                          | Spain       | 1992- 2001   | retrospective cohort           | 81 (44 LC, 37 CC)             | 57                                         | Complete resolution of diarrhoea | 10 (18%)                          | Retrospective, dosage and treatment period unclear. Effect measurement undefined |
| Pardi 2002                                      | US          | 1997-1999    | retrospective cohort           | 170 (LC)                      | 52                                         | Resolution of diarrhea           | 14 (27%)                          | Retrospective, dosage and treatment period unclear. Effect measurement undefined |

Data extraction sheet – PICO 5.7 Bile acid binding agents

| PICO 5.7: Are bile acid binding agents effective in MC? |         |              |                                          |                                  |                                                |                                  |                                           |                                                                                                      |
|---------------------------------------------------------|---------|--------------|------------------------------------------|----------------------------------|------------------------------------------------|----------------------------------|-------------------------------------------|------------------------------------------------------------------------------------------------------|
| First Author Year                                       | Country | Study Period | Study Type                               | Number of patients with MC       | Number of patients treated with cholestyramine | Effect measurement               | Number treated with effect, N (%)         | Comments                                                                                             |
| Bohr 1996                                               | Sweden  | 1989-1995    | retrospective cohort                     | 163 CC                           | 44                                             | Improved symptoms                | 26/44 (59%)                               | 10 of responders had abnormal SeHCAT. 5 of responders had normal SeHCAT                              |
| Olesen 2004                                             | Sweden  |              | retrospective cohort                     | 199 LC                           | 46                                             | Improved symptoms                | 26/46 (57%)                               |                                                                                                      |
| Bjørnbak 2011                                           | Denmark | 2000 - 2010  | retrospective cohort                     | 549<br>(270 CC, 168 LC, 101 MCI) | 95 (CC)<br>43(LC)<br>29 (MCI)                  | Improvement in diarrhoea         | 39/95 (41%)<br>29/43 (67%)<br>22/29 (76%) | Different response rate according to normal or abnormal SeHCAT                                       |
| Fernandez-Banares 2003                                  | Spain   | 1992- 2001   | retrospective cohort                     | 81<br>(44 LC, 37 CC)             | 14 (CC)<br>18 (LC)                             | Complete resolution of diarrhoea | 7/14 (50%)<br>15/18 (83%)                 |                                                                                                      |
| Pardi 2002                                              | US      | 1997-1999    | retrospective cohort                     | 170 (LC)                         | 14                                             | Resolution of diarrhoea          | 29%                                       |                                                                                                      |
| Calabrese 2006                                          | Italy   | 6 month      | Prospective randomised trial, open label | 64 (41 LC,23 CC)                 | 33                                             | Complete resolution of diarrhoea | 30/33 ( 91%)                              | RCT , mesalamine or mesalamin + colestyramine                                                        |
| Ung 2000                                                | Sweden  | 36 mdr       | open label                               | 28 CC                            | 27                                             | Clear decrease in diarrhoea      | 21/27 (78%)                               | 92 % response rate in patients with abnormal SeHCAT 67% response rate in patients with normal SeHCAT |
| Colussi 2015                                            | US      | 2002-2013    | Retrospective cohorte                    | 131<br>(76 CC, 55 LC)            | 17 (CC)<br>4 (LC)                              | Resolution of diarrhoea          | 7/17 (41 %)<br>3/4 (75%)                  |                                                                                                      |

## Data extraction sheet – PICO 5.9 Antibiotics

| PICO 5.9: Is there a role for antibiotics in MC? |         |              |                      |                                        |                               |                                     |                                                |                                            |                |                                                                                            |
|--------------------------------------------------|---------|--------------|----------------------|----------------------------------------|-------------------------------|-------------------------------------|------------------------------------------------|--------------------------------------------|----------------|--------------------------------------------------------------------------------------------|
| First Author (Year)                              | Country | Study period | Studytype            | Studydrug                              | N of MC                       | N of patients treated with AB       | effect measurement                             | Number (%) treated with effect             | Quality rating | Considerations                                                                             |
| Bohr (1996)                                      | Sweden  | 1989-1995    | Retrospective cohort | metronidazol, erythromycin, penicillin | 163 CC                        | metro: 44, Erythro:15, penicillin:8 | Improved symptoms                              | metro: 55%, erythro: 67%, penicillin: 100% | low            | retrospective, case series, Dosage and treatment period unclear. Effect measure undefined. |
| Bjørnbak (2011)                                  | Denmark | 1999-2010    | Retrospective cohort | Antibiotics unclassified               | 549 (270 CC, 168 LC, 101 MCI) | 33                                  | improvement in stool consistency and frequency | 6 / 33 = 18%                               | low            | retrospective, case series. AB drug unknown. Effect measure undefined.                     |
| Olesen (2004)                                    | Sweden  |              | Retrospective cohort | metronidazol, norfloxacin              | 199 LC                        | metro:23, norflox: 5                | Improved symptoms                              | metro: 61 %, norflox: 40%                  | low            | retrospective, case series. Dosage and treatment period unclear. Effect measure undefined. |

## Data extraction sheet – PICO 5.10 Probiotics

| PICO 5.10: Is there a role for probiotics in MC? |         |              |                        |                                                                   |         |                           |                              |                                                      |                                   |         |                |                                                 |
|--------------------------------------------------|---------|--------------|------------------------|-------------------------------------------------------------------|---------|---------------------------|------------------------------|------------------------------------------------------|-----------------------------------|---------|----------------|-------------------------------------------------|
| First Author (Year)                              | Country | Study period | Studytype              | Studydrug                                                         | N of MC | N active drug / N placebo | N active drug / N mesalamine | Effect size                                          | Number treated with effect, N (%) | p-value | Quality rating | Considerations                                  |
| Tromm (2004)                                     | Germany | 4 weeks      | open-label             | E.Coli Nissle                                                     | 14      | 14 / 0                    |                              | reduction in stool number and / or consistency > 50% | 71%                               |         | poor           | no placebo group, small sample size             |
| Wildt (2006)                                     | Denmark | 12 weeks     | DB - RCT               | Lactobacillus acidophilus et Bifidobacterium animalis subs Lactis | 30      | 21 / 8                    |                              | Reduction in number of stools > 50%                  | 6/ 21 (29%) versus 1/8 (13%)      | 0.640   | good           | small sample size,                              |
| Rohatgi (2015)                                   | India   | 8 weeks      | randomised, open-label | VSL3                                                              | 30      |                           | 15 / 15                      | reduction in bowel movements > 50%                   | 5/11 versus 1/13                  | 0.022   | fair           | open-label, no placebo group, small sample size |

## Data extraction sheet – PICO 5.11 Prednisolone and other steroids than Budesonide

| PICO 5.11: Is there a role for prednisolone or other steroids than budesonide in MC? |         |              |                         |                             |         |                           |                                                                 |                               |                |                                                                                                            |
|--------------------------------------------------------------------------------------|---------|--------------|-------------------------|-----------------------------|---------|---------------------------|-----------------------------------------------------------------|-------------------------------|----------------|------------------------------------------------------------------------------------------------------------|
| First Author Year                                                                    | Country | Study period | Study type              | Studydrug                   | N of MC | N active drug / N placebo | effect measurement                                              | Number treated with effect, N | Quality rating | Considerations                                                                                             |
| Munck 2003                                                                           | Denmark | 2 weeks      | DB - RCT                | prednisolone                | 12 CC   | 9 and 3                   | stool volumen and frequency                                     | 2/ 9 and 1 / 3                | good           | small sample size, short treatment duration                                                                |
| Gentile 2013                                                                         | US      |              | retrospective cohorte   | prednisone                  | 315 MC  | 17 / 0                    | 50% reduction in bowel movements                                | 9 / 17 had complete response  | low            | Retrospective, case series, large range of prednisone dosis (7-40mg), no information of treatment duration |
| Sloth 1991                                                                           | Denmark | 3 months     | prospective, open label | prednisolone                | 7 CC    | 7 / 0                     | number of stool before and after treatment                      | 3                             | low            | small sample size, open label                                                                              |
| Bohr 1996                                                                            | Sweden  | 1989-1995    | retrospective cohort    | prednisolone                | 163 CC  | 39 / 0                    | Improved symptoms                                               | 32 / 39                       | low            | retrospective, case series. Dosage and treatment period unclear. Effect measure undefined.                 |
| Olesen 2004                                                                          | Sweden  |              | retrospective cohort    | prednisolone                | 199 LC  | 16 / 0                    | Improved symptoms                                               | 15 / 16                       | low            | retrospective, case series. Dosage and treatment period unclear. Effect measure undefined.                 |
| Pardi 2002                                                                           | US      | 3 years      | retrospective cohort    | prednisolone                | 170 LC  | 15 / 0                    | clinical remission                                              | 6                             | low            | retrospective, case series. Dosage and treatment period unclear. Effect measure undefined.                 |
| De Corte 2019                                                                        | Belgium | 10 months    | Open - label            | beclomethasone dipropionate | 30 MC   | 30 / 0                    | remission at week 8 (defined from stool number and consistency) | 21 / 30 = 70%                 | fair           | open - label                                                                                               |

## Data extraction sheet – PICO 5.12 a. Immunomodulators and Biologics

| PICO 5.12 Is there a role for immunomodulators and biologics in the treatment of patients with MC? |           |              |             |                          |                                |                                        |                                              |                     |                              |                                         |                |                        |                |                                                                                |
|----------------------------------------------------------------------------------------------------|-----------|--------------|-------------|--------------------------|--------------------------------|----------------------------------------|----------------------------------------------|---------------------|------------------------------|-----------------------------------------|----------------|------------------------|----------------|--------------------------------------------------------------------------------|
| First Author Year                                                                                  | Country   | Study period | Studytype   | Studydrug                | N of MC                        | N active drug / N placebo              | AZA/6-MP remission, response, no response, N | AZA/6-MP response % | AZA, 6-MP intolerance, N (%) | MTX remission, response, no response, N | MTX response % | MTX intolerance, N (%) | Quality rating | Considerations                                                                 |
| Pardi 2001                                                                                         | USA       | 1996 - 1999  | Case series | AZA, 6-MP                | 9<br>(6 CC, 1 LC, 2 undefined) | 9 / 0                                  | 7 / 1 / 1                                    | 89                  |                              |                                         |                |                        | Poor           | Not prospective, no placebo control, small sample size                         |
| Münch 2013                                                                                         | Sweden    | 1997 - 2011  | Case series | AZA, 6-MP                | 46<br>(34 CC, 12 LC)           | 46 / 0                                 | 19 / 0 / 2                                   | 41                  | 31 (67 %)                    |                                         |                |                        | Poor           | Not prospective, no placebo control, small sample size                         |
| Cotter 2017                                                                                        | USA       | 1997 - 2016  | Case series | AZA, 6-MP, MTX, TAC, CSP | 73<br>(51 CC, 22 LC)           | 73 (49 AZA/6-MP, 12 MTX, 1 TAC, 1 CSP) | 21 / 11 / 17<br>(AZA)<br>2 / 0 / 1<br>(6-MP) | 69                  | 17 (35 %)                    | 7 / 2 / 3                               | 75             | Not reported           | Poor           | Not prospective, no placebo control, small sample size.                        |
| Riddell 2007                                                                                       | Australia | 1986 - 2005  | Case series | MTX                      | 19 (all CC)                    | 19 / 0                                 |                                              |                     |                              | 14 / 2 / 3                              | 84             | 6 (30%)                | Poor           | Not prospective, no placebo control, small sample size. Also data on TAC + CSP |
| Vennamaneni 2001                                                                                   | USA       | 1995 - 2000  | Case series | AZA, 6-MP                | 6                              | 6 / 0                                  | 3 / 0 / 0                                    | 50%                 | 3 (50 %)                     |                                         |                |                        | Poor           | Not prospective, no placebo control, small sample size                         |
| Münch 2013                                                                                         | Sweden    | 2010 - 2011  | Case series | MTX                      | 9 (all CC)                     | 9 / 0                                  |                                              |                     |                              | 0 / 0 / 5                               | 0              | 4 (44 %)               | Poor           | No placebo control, small sample size                                          |

## Data extraction sheet – PICO 5.12 b. Immunomodulators and Biologics

| PICO 5.12 Is there a role for immunomodulators and biologics in the treatment of patients with MC? |                                      |              |             |           |                 |                    |                                                |                                                                                                                               |                                               |                                                                                                |                                               |                                                                                                                                                                                                           |                |                                                        |
|----------------------------------------------------------------------------------------------------|--------------------------------------|--------------|-------------|-----------|-----------------|--------------------|------------------------------------------------|-------------------------------------------------------------------------------------------------------------------------------|-----------------------------------------------|------------------------------------------------------------------------------------------------|-----------------------------------------------|-----------------------------------------------------------------------------------------------------------------------------------------------------------------------------------------------------------|----------------|--------------------------------------------------------|
| First Author Year                                                                                  | Country                              | Study period | Studytype   | Studydrug | N of MC         | N active drug      | IFX response: remission/ response/ no response | Further treatment                                                                                                             | ADA response remission/ response/ no response | Further treatment                                                                              | VDZ response remission/ response/ no response | Further treatment                                                                                                                                                                                         | Quality rating | Considerations                                         |
| Esteve 2011                                                                                        | Spain, USA                           | 1993 - 2010  | Case series | IFX, ADA  | 4 CC            | 4 (4 IFX, 3 ADA)   | 2 / 1 / 1                                      | 1 remission → maintenance<br>2 intolerant → adalimumab<br>1 refractory → adalimumab                                           | 2 / 0 / 1                                     | 2 remission → maintenance<br>1 refractory → colectomy (IFX discontinued after SJS)             |                                               |                                                                                                                                                                                                           | Poor           | Not prospective, no placebo control, small sample size |
| Müñch 2012                                                                                         | Sweden                               | 2010 - 2011  | Case series | ADA       | 3 CC            | 3                  |                                                |                                                                                                                               | 3 / 0 / 0                                     | 2 remission → maintenance<br>1 intolerant → discontinuation                                    |                                               |                                                                                                                                                                                                           | Poor           | No placebo control, small sample size                  |
| Ghazaleh 2010                                                                                      | USA                                  | Not reported | Case series | IFX, ADA  | 2 LC            | 2 (1 IFX, 1 ADA)   | 1 / 0 / 0                                      | 1 remission → maintenance                                                                                                     | 1 / 0 / 0                                     | 1 remission → maintenance                                                                      |                                               |                                                                                                                                                                                                           | Poor           | Not prospective, no placebo control, small sample size |
| Cushing 2018                                                                                       | USA                                  | Not reported | Case report | VDZ       | 1 CC            | 1                  |                                                |                                                                                                                               |                                               |                                                                                                | 1 / 0 / 0                                     | Remission → maintenance                                                                                                                                                                                   | Poor           | Single case report                                     |
| Casper 2018                                                                                        | Germany                              | 2016 - 2018  | Case report | IFX, VDZ  | 1 CC            | 1 (1 IFX, 1 VDZ)   | 0 / 1 / 0                                      | Partial response, but had mucosal rectum prolapse → surgery → discontinuation of IFX → relapse → VDZ                          |                                               |                                                                                                | 0 / 1 / 0                                     | Partial response → maintenance                                                                                                                                                                            | Poor           | Single case report                                     |
| Anderson 2016                                                                                      | United Kingdom                       | Not reported | Case report | ADA       | 1 LC            | 1                  |                                                |                                                                                                                               | 1 / 0 / 0                                     | Remission → maintenance                                                                        |                                               |                                                                                                                                                                                                           | Poor           | Single case report                                     |
| Pola 2013                                                                                          | USA                                  | Not reported | Case report | IFX       | 1 CC            | 1                  | 1 / 0 / 0                                      | Remission → maintenance                                                                                                       |                                               |                                                                                                |                                               |                                                                                                                                                                                                           | Poor           | Single case report                                     |
| Rivière 2018                                                                                       | Belgium, Sweden, Switzerland, Canada | Not reported | Case series | VDZ       | 11 (6 CC, 5 LC) | 11                 |                                                |                                                                                                                               |                                               |                                                                                                | 5 / 0 / 6                                     | 5 remission → maintenance → 1 discontinued after 1 year due to loss of response<br>6 refractory → rescue therapies (1 budesonide, 1 systemic steroids, 1 methotrexate, 1 ustekinumab, 2 loop ileostomies) | Poor           | Not prospective, no placebo control, small sample size |
| Cotter 2017                                                                                        | USA                                  | 1997 - 2016  | Case series | IFX, ADA  | 12 MC           | 12 (10 IFX, 2 ADA) | 3 / 3 / 4                                      | 3 remission → maintenance (mean 4 months)<br>3 partial response → maintenance (mean 23 months)<br>3 refractory → not reported | 1 / 1 / 0                                     | 1 remission → maintenance (mean 4 months)<br>1 partial response → maintenance (mean 23 months) |                                               |                                                                                                                                                                                                           | Poor           | Not prospective, no placebo control, small sample size |



## Data extraction sheet – PICO 5.13 Surgery

| PICO 5.13: Is there a role for surgery in MC? |         |              |             |         |                                                                                                                   |                                                          |                                                          |                                                                                                                               |                                                                                                                                          |                |                                                                                                                                                                              |
|-----------------------------------------------|---------|--------------|-------------|---------|-------------------------------------------------------------------------------------------------------------------|----------------------------------------------------------|----------------------------------------------------------|-------------------------------------------------------------------------------------------------------------------------------|------------------------------------------------------------------------------------------------------------------------------------------|----------------|------------------------------------------------------------------------------------------------------------------------------------------------------------------------------|
| First Author Year                             | Country | Study period | Studytype   | N of MC | Previous treatment                                                                                                | Indications for surgery                                  | Procedure                                                | Postoperative course                                                                                                          | Further Procedures                                                                                                                       | Quality rating | Considerations                                                                                                                                                               |
| Daferera 2015                                 | Sweden  | Not reported | Case report | 1 (CC)  | Loperamide, cholestyramine, budesonide, methotrexate, adalimumab, prednisolone                                    | All previous treatment measures had failed               | Loop ileostomy                                           | Remission for 1 year → bowel reconstruction → relapse                                                                         |                                                                                                                                          | Poor           | Single case report<br>Collagen layer thickness normalized during fecal diversion and increased after reconstruction.                                                         |
| Williams 2000                                 | USA     | 1997         | Case report | 1 (CC)  | Mesalazine, prednisone,                                                                                           | Treatment failure, severe diarrhoea (up to 30 times/day) | Ileostomy → proctocolectomy with ileal pouch anastomosis | Remission (8 - 10 bowel movements/day)                                                                                        |                                                                                                                                          | Poor           | Single case report                                                                                                                                                           |
| Järnerot 1995                                 | Sweden  | 1980 - 1995  | Case series | 9 (CC)  | Sulfasalazine, mepacrine, steroids, cholestyramine, loperamide, mesalamine, metronidazole (and other antibiotics) | Treatment failure, severe diarrhoea with incontinence    | Ileostomy (n 8), sigmoidostomy (n 1)                     | Ileostomy (n 8) → remission, normal collagen layer<br>Sigmoidostomy (n 1) → high sigmoidostomy output → ileostomy → remission | Closure of ileostomy + colectomy (n 2)<br>Closure of ileostomy (n 3) → relapse (clinical and histological) → colectomy (n 3) → remission | Poor           | Not prospective, no placebo control, small sample size                                                                                                                       |
| Münc 2005                                     | Sweden  |              | Case report | 1 (CC)  | Loperamide, budesonide, prednisolone, 5-aminosalicylate, cholestyramine, norfloxacin                              | Treatment failure                                        | Loop ileostomy                                           | Remission, wound infection, C. difficile infection → ileostomy closure → relapse (despite budesonide)                         |                                                                                                                                          | Poor           | Single case report. Permeability was increased before surgery and decreased after loop ileostomy but increased again after bowel reconstruction (biopsies in Ussing chamber) |

## Supplementary material – Appendix C

**Table 1:** Summary of factors and evidence related to the pathogenesis of MC

| <b>Luminal factors</b>                                                                                                                                                                                                                                                                                                                                                                                                                                                                                                                                                                                                                                                                                                                                                                                                                                                                                                |
|-----------------------------------------------------------------------------------------------------------------------------------------------------------------------------------------------------------------------------------------------------------------------------------------------------------------------------------------------------------------------------------------------------------------------------------------------------------------------------------------------------------------------------------------------------------------------------------------------------------------------------------------------------------------------------------------------------------------------------------------------------------------------------------------------------------------------------------------------------------------------------------------------------------------------|
| <ul style="list-style-type: none"> <li>• Differences in bacterial composition [p1-p6]</li> <li>• Effect of fecal microbiota transplantation [p7-p10]</li> <li>• Effects of faecal stream diversion [p11]</li> <li>• Bile acids as mucosal inflammation trigger [p12, p13]</li> <li>• Colonic toxicity of drugs [p14]</li> </ul>                                                                                                                                                                                                                                                                                                                                                                                                                                                                                                                                                                                       |
| <b>Autoimmunity phenomena</b>                                                                                                                                                                                                                                                                                                                                                                                                                                                                                                                                                                                                                                                                                                                                                                                                                                                                                         |
| <ul style="list-style-type: none"> <li>• Association with autoimmune disorders including celiac disease [p15-p25]</li> <li>• Response to immunosuppressive drugs of even TNF-alpha blockers [p26,p27]</li> <li>• Contradictory evidence related to auto-antibody prevalence [p28-p30]</li> </ul>                                                                                                                                                                                                                                                                                                                                                                                                                                                                                                                                                                                                                      |
| <b>Innate immune system</b>                                                                                                                                                                                                                                                                                                                                                                                                                                                                                                                                                                                                                                                                                                                                                                                                                                                                                           |
| <ul style="list-style-type: none"> <li>• Nitric oxide (effector of innate immune response) concentration [p31]</li> <li>• Lysozyme concentration in MC as a reaction of luminal agents [p32]</li> <li>• Toll-like receptor activation [p33]</li> <li>• Effect of faecal stream diversion on subepithelial collagen thickening regression [p34]</li> <li>• Different chemokines and chemokine receptors expression in active vs. inactive MC [p35]</li> <li>• IKK<math>\beta</math> activity, strong NF<math>\kappa</math>B DNA binding [p36] downregulation of E-cadherin and ZO-1 [p37], decreased occludin and claudin-4 expression [p38] and local eosinophil activation, altered mucosal permeability and increased colorectal mucosal secretion of bFGF in CC [p39]</li> </ul>                                                                                                                                   |
| <b>Adaptative immune system</b>                                                                                                                                                                                                                                                                                                                                                                                                                                                                                                                                                                                                                                                                                                                                                                                                                                                                                       |
| <ul style="list-style-type: none"> <li>• Increased numbers of CD4<sup>+</sup> T lymphocytes in the lamina propria and increased numbers of CD8<sup>+</sup> T lymphocytes in the epithelium [p40-p44]</li> <li>• Increased of CD8<sup>+</sup> T cells in the lamina propria, with higher numbers of CD8<sup>+</sup> and CD4<sup>+</sup> TCR<math>\gamma\delta</math><sup>+</sup> T cells [p45-p48]</li> <li>• Both CD4<sup>+</sup> and CD8<sup>+</sup> in lamina propria as well as intraepithelial T cells with expression of the activation/memory marker CD45RO and the proliferation marker Ki67 [p46]</li> <li>• CD8<sup>+</sup> cytotoxic T cells as primary immune cells as seen by gene expression [p49]</li> <li>• Higher numbers of CD4<sup>+</sup>CD25<sup>+</sup>FOXP3<sup>+</sup> regulatory T cells in the mucosa, with higher levels of the anti-inflammatory cytokine IL-10 [p44, p45, p47]</li> </ul> |

- Th1 or a mixed Th17/Tc17 and Th1/Tc1 mucosal cytokine profile, reduced numbers of Th1 and Th17 cells in MC, and a mixed Th1/Th2 immune response, with expression of both T-bet and the Th2 transcription factor GATA-3 in LC [p37, p50, p51, p52; p48]
- Reduction of mucosa protein levels of most cytokines post-fecal diversion [p53], decreased in CD8<sup>+</sup> IELs and both CD4<sup>+</sup> and CD8<sup>+</sup>activated/memory LPLs, with an increased proportion of CD4<sup>+</sup> FoxP3<sup>+</sup> lamina propria T<sub>reg</sub>, but a decreased proportion of CD8<sup>+</sup> Foxp3<sup>+</sup> T cells [p7]
- Increased production of both pro- and anti-inflammatory cytokines by peripheral blood T cells in the presence of soluble factors from the inflamed colonic mucosa in CC [p54]
- Reduced T cell receptor excision circle levels in the colon of MC patients compared to controls [p55]
- Differences in TCRβ repertoire in colonic biopsies of MC patients [p56]

### **Extracellular matrix (EMC) remodeling**

- Subepithelial band consists of collagen type VI (as primary alteration of collagen synthesis) and collagen I and III (probably representing an attempt to repair after a chronic inflammatory damage) [p57-p60]
- Collagen deposition may be reversible [p11, p34, p53, p61]
- Numerous cytokines with pro-inflammatory action and some even with strong pro-fibrotic action are overexpressed in MC (TNF-α, IFN-γ, IL-15, IL-6, IL-1β, IL-21, IL-22, IL-12, IL-23, IL-17A) [p37, p46, p47, p62]
- Increased expression of TGF-β and TIMP-1 (important regulators of ECM breakdown and fibrosis) in the colonic mucosa of patients with CC as compared to controls [p60, p63]
- Proton pump inhibitors increases expression of fibrosis inducing factors like TGF-β and fibroblast growth factor 2, as well as, collagen types III and IV [p64]
- Increase of mucosal secretion and expression of basic fibroblast growth factor (bFGF), in CC [p65].
- Strong expression for VEGF within the epithelium, inflammatory cells, and fibroblasts in CC leading to collagen accumulation [p66, p67]
- COX-2 increased in colonic mucosa of CC patients [p52,p68], chronic COX-2 inhibition promotes myofibroblast-associated intestinal fibrosis [p69,p70]
- MMP-1 expression, counteracted by increased TIMP-1 expression, suggests locally impaired fibrolysis [p60]. A defect in activation of MMP-9 in CC could contribute to the accumulation of subepithelial collagen [p71, p72]

### **Genetic factors**

- Familial cases where first-degree relatives were generally affected also by other autoimmune diseases [p73-p79]
- Candidate-gene approach including the human leukocyte antigen (HLA) region, nucleotide oligomerization domain containing 2 (*NOD2*), tumor necrosis factor (*TNF*), adrenergic receptor alpha 2A (*ADRA2A*), matrix metalloproteinase-9 (*MMP9*), interleukin 6 (*IL6*), FERM domain containing 4B (*FRMD4B*), serotonin transporter solute carrier family 6 member 4 (*SLC6A4*), and phosphatase and tensin homolog (*PTEN*) [p80-85,p71, p79]
- Predisposing role of the extended HLA haplotype 8.1, which contains variants (HLA-DQ2) known to be relevant also to other immune-related diseases, particularly celiac disease [p80-82; p84], that appear to be specific to CC and not observed in LC [p86, p87]

#### **Pathogenesis of the diarrhoea in microscopic colitis**

- *Osmosis*: Normal stool weight restored by fasting in some cases [p88]. Elementary diet can reduce diarrhoea associated with MC [p89]. The faecal osmotic gap is variable among patients with MC [p88;p90].
- *Reduced absorption*: Decrease in absorptive net fluxes of sodium and chloride in CC [p38]. Epithelial Na<sup>+</sup> channel is inhibited in human sigmoid colon of LC patients [p91], fecal sodium and chloride concentration are increased [p90], increased level of luminal nitric oxide and epithelial nitric oxide synthase [p31,p37].
- *Increased secretion*: Active electrogenic chloride secretion in CC patients [p38]
- *Epithelial barrier dysfunction*: Colonic epithelial resistance is diminished accompanied by a decrease in transmembrane strand-forming proteins of the epithelial tight junction (E-cadherin, occludin and claudins) [p3, p38, p92].
- *Dysregulation of aquaporins* [p93].
- *Abnormal motility*: Abnormal motility is uncertain and poorly investigated [p94, p95]
- *Bile acid malabsorption*: preventing water absorption and increasing water secretion by intracellular mediators or intracellular and epithelial barrier permeability [p96]

#### **References to Table 1**

- p1. Millien V, Rosen D, Hou J, Shah R. Proinflammatory Sulfur-Reducing Bacteria Are More Abundant in Colonic Biopsies of Patients with Microscopic Colitis Compared to Healthy Controls. *Dig Dis Sci* 2019; 64: 432–438.
- p2. Fischer H, Holst E, Karlsson F, et al. Altered microbiota in microscopic colitis. *Gut* 2015; 64: 1185–1186.

- p3. Carstens A, Dicksved J, Nelson R, et al. The Gut Microbiota in Collagenous Colitis Shares Characteristics With Inflammatory Bowel Disease-Associated Dysbiosis. *Clin Transl Gastroenterol* 2019; 10(7): e00065. doi:10.14309/ctg.0000000000000065
- p4. Rindom Krogsgaard L, Kristian Munck L, Bytzer P, Wildt S. An altered composition of the microbiome in microscopic colitis is driven towards the composition in healthy controls by treatment with budesonide. *Scand J Gastroenterol* 2019; 54: 446–452.
- p5. Carstens A, Dicksved J, Nelson R, et al. The Gut Microbiota in Collagenous Colitis Shares Characteristics With Inflammatory Bowel Disease-Associated Dysbiosis. *Clin Transl Gastroenterol* 2019; 10:e00065. doi:10.14309/ctg.0000000000000065
- p6. Morgan DM, Cao Y, Miller K, et al. Microscopic Colitis Is Characterized by Intestinal Dysbiosis. *Clin Gastroenterol Hepatol* 2020; 18: 984–986.
- p7. Günaltay S, Rademacher L, Hultgren Hörnquist E, Bohr J. Clinical and immunologic effects of faecal microbiota transplantation in a patient with collagenous colitis. *World J Gastroenterol* 2017; 23: 1319–1324.
- p8. Fasullo MJ, Al-Azzawi Y, Abergel J. Microscopic Colitis After Fecal Microbiota Transplant. *ACG Case Rep J* 2017;4:e87. Published 2017 Jul 19. doi:10.14309/crj.2017.87
- p9. Parekh, *Am J Gastroenterol*, 2016; 111:S1308
- p10. Tariq R, Smyrk T, Pardi DS, Tremaine WJ, Khanna S. New-Onset Microscopic Colitis in an Ulcerative Colitis Patient After Fecal Microbiota Transplantation. *Am J Gastroenterol* 2016; 111: 751–752.
- p11. Järnerot G, Bohr J, Tysk C, Eriksson S. Faecal stream diversion in patients with collagenous colitis. *Gut* 1996; 38: 154–155.
- p12. Vijayvargiya P, Camilleri M. Update on Bile Acid Malabsorption: Finally Ready for Prime Time?. *Curr Gastroenterol Rep* 2018; 20:10.
- p13. Torres J, Palmela C, Gomes de Sena P, et al. Farnesoid X Receptor Expression in Microscopic Colitis: A Potential Role in Disease Etiopathogenesis. *GE Port J Gastroenterol* 2018; 25: 30–37.
- p14. Cappell MS. Colonic toxicity of administered drugs and chemicals. *Am J Gastroenterol* 2004; 99: 1175–1190.
- p15. Bohr J, Tysk C, Yang P, Danielsson D, Järnerot G. Autoantibodies and immunoglobulins in collagenous colitis. *Gut* 1996; 39: 73–76.
- p16. Cronin EM, Sibartie V, Crosbie OM, Quigley EM. Autoimmune hepatitis in association with lymphocytic colitis. *J Clin Gastroenterol* 2006; 40: 648–650.
- p17. Macaigne G, Boivin JF, Harnois F, et al. Gastrite collagène et iléocolite collagène survenant dans un contexte dysimmunitaire: à propos d'un cas et revue de la littérature [Collagenous gastritis and ileo-colitis occurred in autoimmune context: report of a case and review of the literature]. *Gastroenterol Clin Biol* 2010; 34: e1–e6.
- p18. Kanitez NA, Toz B, Güllüoğlu M, et al. Microscopic colitis in patients with Takayasu's arteritis: a potential association between the two disease entities. *Clin Rheumatol* 2016; 35: 2495–2499.
- p19. Madisch A, Miehke S, Bartosch F, Bethke B, Stolte M. Microscopic colitis: clinical presentation, treatment and outcome of 494 patients. *Z Gastroenterol* 2014; 52: 1062–1065.
- p20. Olesen M, Eriksson S, Bohr J, Järnerot G, Tysk C. Lymphocytic colitis: a retrospective clinical study of 199 Swedish patients. *Gut* 2004; 53: 536–541.
- p21. Pardi DS, Ramnath VR, Loftus EV Jr, Tremaine WJ, Sandborn WJ. Lymphocytic colitis: clinical features, treatment, and outcomes. *Am J Gastroenterol* 2002;97: 2829–2833.
- p22. Vigren L, Tysk C, Ström M, et al. Celiac disease and other autoimmune diseases in patients with collagenous colitis. *Scand J Gastroenterol* 2013; 48: 944–950.
- p23. Wickbom A, Nyhlin N, Montgomery SM, Bohr J, Tysk C. Family history, comorbidity, smoking and other risk factors in microscopic colitis: a case-control study. *Eur J Gastroenterol Hepatol* 2017; 29: 587–594.

- p24. Macaigne G, Lahmek P, Locher C, et al. Microscopic colitis or functional bowel disease with diarrhea: a French prospective multicenter study. *Am J Gastroenterol* 2014; 109: 1461–1470.
- p25. Green PH, Yang J, Cheng J, Lee AR, Harper JW, Bhagat G. An association between microscopic colitis and celiac disease. *Clin Gastroenterol Hepatol* 2009; 7: 1210–1216.
- p26. Münch A, Fernandez-Banares F, Munck LK. Azathioprine and mercaptopurine in the management of patients with chronic, active microscopic colitis. *Aliment Pharmacol Ther* 2013; 37: 795–798.
- p27. Esteve M, Mahadevan U, Sainz E, Rodriguez E, Salas A, Fernández-Bañares F. Efficacy of anti-TNF therapies in refractory severe microscopic colitis. *J Crohns Colitis* 2011; 5: 612–618.
- p28. Holstein A, Burmeister J, Plaschke A, Rosemeier D, Widjaja A, Egberts EH. Autoantibody profiles in microscopic colitis. *J Gastroenterol Hepatol* 2006; 21: 1016–1020.
- p29. Gustafsson RJ, Roth B, Lantz M, Hallengren B, Manjer J, Ohlsson B. A cross-sectional study of subclinical and clinical thyroid disorders in women with microscopic colitis compared to controls. *Scand J Gastroenterol* 2013; 48: 1414–1422.
- p30. Roth B, Gustafsson RJ, Ohlsson B. Auto-antibodies and their association with clinical findings in women diagnosed with microscopic colitis. *PLoS One* 2013; 8: e66088.
- p31. Olesen M, Middelveld R, Bohr J, et al. Luminal nitric oxide and epithelial expression of inducible and endothelial nitric oxide synthase in collagenous and lymphocytic colitis. *Scand J Gastroenterol* 2003; 38: 66-72.
- p32. Rubio CA. Lysozyme expression in microscopic colitis. *J Clin Pathol* 2011; 64: 510–515.
- p33. Günaltay S, Nyhlin N, Kumawat AK, et al. Differential expression of interleukin-1/Toll-like receptor signaling regulators in microscopic and ulcerative colitis. *World J Gastroenterol* 2014; 20: 12249–12259.
- p34. Järnerot G, Tysk C, Bohr J, Eriksson S. Collagenous colitis and fecal stream diversion. *Gastroenterology* 1995; 109: 449–455.
- p35. Günaltay S, Kumawat AK, Nyhlin N, et al. Enhanced levels of chemokines and their receptors in the colon of microscopic colitis patients indicate mixed immune cell recruitment. *Mediators Inflamm* 2015; 2015: 132458.
- p36. Andresen L, Jørgensen VL, Perner A, Hansen A, Eugen-Olsen J, Rask-Madsen J. Activation of nuclear factor kappaB in colonic mucosa from patients with collagenous and ulcerative colitis. *Gut* 2005; 54: 503–509.
- p37. Tagkalidis PP, Gibson PR, Bhathal PS. Microscopic colitis demonstrates a T helper cell type 1 mucosal cytokine profile. *J Clin Pathol* 2007; 60: 382–387.
- p38. Bürgel N, Bojarski C, Mankertz J, Zeitz M, Fromm M, Schulzke JD. Mechanisms of diarrhea in collagenous colitis. *Gastroenterology* 2002; 123: 433–443.
- p39. Taha Y, Carlson M, Thorn M, Loof L, Raab Y. Evidence of local eosinophil activation and altered mucosal permeability in collagenous colitis. *Dig Dis Sci.* 2001; 46: 888–897.
- p40. Mosnier JF, Larvol L, Barge J, et al. Lymphocytic and collagenous colitis: an immunohistochemical study. *Am J Gastroenterol* 1996; 91: 709–713.
- p41. Lazenby AJ, Yardley JH, Giardiello FM, Jessurun J, Bayless TM. Lymphocytic ("microscopic") colitis: a comparative histopathologic study with particular reference to collagenous colitis. *Hum Pathol* 1989; 20: 18–28.
- p42. Lazenby AJ, Yardley JH, Giardiello FM, Bayless TM. Pitfalls in the diagnosis of collagenous colitis: experience with 75 cases from a registry of collagenous colitis at the Johns Hopkins Hospital. *Hum Pathol* 1990 ;21: 905–910.
- p43. Armes J, Gee DC, Macrae FA, Schroeder W, Bhathal PS. Collagenous colitis: jejunal and colorectal pathology. *J Clin Pathol* 1992; 45: 784–787.
- p44. Bai S, Siegal GP, Jhala NC. Foxp3 expression patterns in microscopic colitides: a clinicopathologic study of 69 patients. *Am J Clin Pathol* 2012; 137: 931-936.
- p45. Göranson C, Kumawat AK, Hultgren-Hörnqvist E, et al. Immunohistochemical characterization of lymphocytes in microscopic colitis. *J Crohns Colitis* 2013; 7: e434–e442.

- p46. Kumawat AK, Strid H, Elgbratt K, Tysk C, Bohr J, Hultgren Hörnquist E. Microscopic colitis patients have increased proportions of Ki67(+) proliferating and CD45RO(+) active/memory CD8(+) and CD4(+)8(+) mucosal T cells. *J Crohns Colitis* 2013; 7: 694–705.
- p47. Carrasco A, Esteve M, Salas A, et al. Immunological Differences between Lymphocytic and Collagenous Colitis. *J Crohns Colitis* 2016; 10: 1055–1066.
- p48. Carrasco A, Fernández-Bañares F, Pedrosa E, et al. Regional Specialisation of T Cell Subsets and Apoptosis in the Human Gut Mucosa: Differences Between Ileum and Colon in Healthy Intestine and Inflammatory Bowel Diseases. *J Crohns Colitis* 2016; 10: 1042–1054.
- p49. Halvorsen S. *Gastroenterology* 2019, 156, suppl 1, S-444.
- p50. Jöhrens K, Grünbaum M, Anagnostopoulos I. Differences in the T-bet and GATA-3 expression patterns between lymphocytic colitis and coeliac disease. *Virchows Arch* 2010; 457: 451–456.
- p51. Kumawat AK, Strid H, Tysk C, Bohr J, Hörnquist EH. Microscopic colitis patients demonstrate a mixed Th17/Tc17 and Th1/Tc1 mucosal cytokine profile. *Mol Immunol.* 2013;55(3-4):355–364. doi:10.1016/j.molimm.2013.03.007
- p52. Park EK, Park YS, Park DR, et al. Cytokine expression of microscopic colitis including interleukin-17. *Gut Liver.* 2015;9(3):381–387. doi:10.5009/gnl13439
- p53. Daferera N, Kumawat AK, Hultgren-Hörnquist E, Ignatova S, Ström M, Münch A. Fecal stream diversion and mucosal cytokine levels in collagenous colitis: A case report. *World J Gastroenterol.* 2015;21(19):6065–6071. doi:10.3748/wjg.v21.i19.6065
- p54. Kumawat AK, Nyhlin N, Wickbom A, et al. An in vitro model to evaluate the impact of the soluble factors from the colonic mucosa of collagenous colitis patients on T cells: enhanced production of IL-17A and IL-10 from peripheral CD4<sup>+</sup> T cells. *Mediators Inflamm* 2014; 2014: 879843.
- p55. Kumawat AK, Elgbratt K, Tysk C, Bohr J, Hörnquist EH. Reduced T cell receptor excision circle levels in the colonic mucosa of microscopic colitis patients indicate local proliferation rather than homing of peripheral lymphocytes to the inflamed mucosa. *Biomed Res Int* 2013; 2013: 408638.
- p56. Günaltay S, Repsilber D, Helenius G, et al. Oligoclonal T-cell Receptor Repertoire in Colonic Biopsies of Patients with Microscopic Colitis and Ulcerative Colitis. *Inflamm Bowel Dis* 2017; 23: 932–945.
- p57. Aigner T, Neureiter D, Müller S, Küspert G, Belke J, Kirchner T. Extracellular matrix composition and gene expression in collagenous colitis. *Gastroenterology* 1997; 113: 136–143.
- p58. Baum CA, Bhatia P, Miner PB Jr. Increased colonic mucosal mast cells associated with severe watery diarrhea and microscopic colitis. *Dig Dis Sci* 1989; 34: 1462–1465.
- p59. Stampfl DA, Friedman LS. Collagenous colitis: pathophysiologic considerations. *Dig Dis Sci* 1991; 36: 705–711.
- p60. Günther U, Schuppan D, Bauer M, et al. Fibrogenesis and fibrolysis in collagenous colitis. Patterns of procollagen types I and IV, matrix-metalloproteinase-1 and -13, and TIMP-1 gene expression. *Am J Pathol* 1999; 155: 493–503.
- p61. Veress B, Reinholt FP, Lindquist K, Liljeqvist L. Different types of mucosal adaptation in the ileal reservoir after restorative proctocolectomy. A two-year follow-up study. *APMIS* 1990; 98: 786-796.
- p62. Koskela RM, Karttunen TJ, Niemelä SE, Lehtola JK, Bloigu RS, Karttunen RA. Cytokine gene polymorphism in microscopic colitis association with the IL-6-174 GG genotype. *Eur J Gastroenterol Hepatol* 2011; 23: 607–613.
- p63. Ståhle-Bäckdahl M, Maim J, Veress B, Benoni C, Bruce K, Egesten A. Increased presence of eosinophilic granulocytes expressing transforming growth factor-beta1 in collagenous colitis. *Scand J Gastroenterol* 2000; 35: 742–746.
- p64. Mori S, Kadochi Y, Luo Y, et al. Proton pump inhibitor induced collagen expression in colonocytes is associated with collagenous colitis. *World J Gastroenterol* 2017; 23: 1586–1593.
- p65. Taha Y, Raab Y, Larsson A, et al. Mucosal secretion and expression of basic fibroblast growth factor in patients with collagenous colitis. *Am J Gastroenterol* 2003; 98: 2011–2017.

- p66. Griga T, Tromm A, Schmiegel W, Pfisterer O, Müller KM, Brasch F. Collagenous colitis: implications for the role of vascular endothelial growth factor in repair mechanisms. *Eur J Gastroenterol Hepatol* 2004; 16: 397–402.
- p67. Taha Y, Raab Y, Larsson A, et al. Vascular endothelial growth factor (VEGF)--a possible mediator of inflammation and mucosal permeability in patients with collagenous colitis. *Dig Dis Sci* 2004; 49: 109–115.
- p68. Wildt S, Rumessen JJ, Csillag C, Normark M, Poulsen KA, Kolko M. Cyclooxygenase-2 immunoreactivity in collagenous colitis. *APMIS* 2009; 117: 500–506.
- p69. Davids JS, Carothers AM, Damas BC, Bertagnolli MM. Chronic cyclooxygenase-2 inhibition promotes myofibroblast-associated intestinal fibrosis. *Cancer Prev Res* 2010; 3: 348–358.
- p70. Klopčič B, Appelbee A, Raye W, et al. Indomethacin and retinoic acid modify mouse intestinal inflammation and fibrosis: a role for SPARC. *Dig Dis Sci* 2008; 53: 1553–1563.
- p71. Madisch A, Hellmig S, Schreiber S, Bethke B, Stolte M, Miehlke S. Allelic variation of the matrix metalloproteinase-9 gene is associated with collagenous colitis. *Inflamm Bowel Dis* 2011; 17: 2295–2298.
- p72. Lakatos G, Sipos F, Miheller P, et al. The behavior of matrix metalloproteinase-9 in lymphocytic colitis, collagenous colitis and ulcerative colitis. *Pathol Oncol Res.* 2012; 18: 85–91.
- p73. van Tilburg AJ, Lam HG, Seldenrijk CA, et al. Familial occurrence of collagenous colitis. A report of two families. *J Clin Gastroenterol* 1990; 12: 279–285.
- p74. Chutkan R, Sternthal M, Janowitz HD. A family with collagenous colitis, ulcerative colitis, and Crohn's disease. *Am J Gastroenterol* 2000; 95: 3640–3641.
- p75. Abdo AA, Zetler PJ, Halparin LS. Familial microscopic colitis. *Can J Gastroenterol* 2001; 15: 341–343.
- p76. Järnerot G, Hertervig E, Grännö C, et al. Familial occurrence of microscopic colitis: a report on five families. *Scand J Gastroenterol* 2001; 36: 959–962.
- p77. Freeman HJ. Familial occurrence of lymphocytic colitis. *Can J Gastroenterol* 2001; 15: 757–760.
- p78. Thomson A, Kaye G. Further report of familial occurrence of collagenous colitis. *Scand J Gastroenterol* 2002;37:1116.
- p79. Norén E, Mellander MR, Almer S, Söderman J. Genetic Variation and Gene Expression Levels of Tight Junction Genes Indicates Relationships Between PTEN as well as MAGI1 and Microscopic Colitis. *Dig Dis Sci* 2018; 63: 105–112.
- p80. Giardiello FM, Lazenby AJ, Yardley JH, et al. Increased HLA A1 and diminished HLA A3 in lymphocytic colitis compared to controls and patients with collagenous colitis. *Dig Dis Sci* 1992; 37: 496–499.
- p81. Fine KD, Do K, Schulte K, et al. High prevalence of celiac sprue-like HLA-DQ genes and enteropathy in patients with the microscopic colitis syndrome. *Am J Gastroenterol* 2000; 95: 1974–1982.
- p82. Fernández-Bañares F, Esteve M, Farré C, et al. Predisposing HLA-DQ2 and HLA-DQ8 haplotypes of coeliac disease and associated enteropathy in microscopic colitis. *Eur J Gastroenterol Hepatol* 2005; 17: 1333–1338.
- p83. Madisch A, Hellmig S, Schreiber S, Bethke B, Stolte M, Miehlke S. NOD2/CARD15 gene polymorphisms are not associated with collagenous colitis. *Int J Colorectal Dis* 2007; 22: 425–428.
- p84. Koskela RM, Karttunen TJ, Niemelä SE, Lehtola JK, Ilonen J, Karttunen RA. Human leucocyte antigen and TNFalpha polymorphism association in microscopic colitis. *Eur J Gastroenterol Hepatol* 2008; 20: 276–282.
- p85. Sikander A, Rana SV, Sharma SK, et al. Association of alpha 2A adrenergic receptor gene (ADRA2A) polymorphism with irritable bowel syndrome, microscopic and ulcerative colitis. *Clin Chim Acta* 2010; 411: 59–63.



- p86. Westerlind H, Mellander MR, Bresso F, et al. Dense genotyping of immune-related loci identifies HLA variants associated with increased risk of collagenous colitis. *Gut* 2017; 66: 421–428.
- p87. Westerlind H, Bonfiglio F, Mellander MR, et al. HLA Associations Distinguish Collagenous From Lymphocytic Colitis. *Am J Gastroenterol* 2016; 111: 1211–1213.
- p88. Bohr J, Järnerot G, Tysk C, Jones I, Eriksson S. Effect of fasting on diarrhoea in collagenous colitis. *Digestion* 2002; 65: 30–34.
- p89. Jensen L, Munck LK. Elementary diet reduces diarrhoea associated with microscopic colitis. *Scand J Gastroenterol* 2005; 40: 1495–1496.
- p90. Protic M, Jojic N, Bojic D, et al. Mechanism of diarrhea in microscopic colitis. *World J Gastroenterol* 2005; 11: 5535–5539.
- p91. Barmeyer C, Erko I, Fromm A, et al. ENaC Dysregulation Through Activation of MEK1/2 Contributes to Impaired Na<sup>+</sup> Absorption in Lymphocytic Colitis. *Inflamm Bowel Dis* 2016; 22: 539–547.
- p92. Barmeyer C, Erko I, Awad K, et al. Epithelial barrier dysfunction in lymphocytic colitis through cytokine-dependent internalization of claudin-5 and -8. *J Gastroenterol* 2017; 52: 1090–1100.
- p93. Holm A. *J Crohn's Colitis* 2017; 11: S102 (abstract).
- p94. El-Salhy M, Gundersen D, Hatlebakk JG, Hausken T. High densities of serotonin and peptide YY cells in the colon of patients with lymphocytic colitis. *World J Gastroenterol* 2012; 18: 6070-6075.
- p95. Schub RO, Whitehead WE, Giardiello FM, Schuster MM. Colonic motility and myoelectric activity in patients with collagenous colitis. *Gastroenterology* 1989; 96: A455.
- p96. Münch A, Söderholm JD, Ost A, Carlsson AH, Magnusson KE, Ström M. Low levels of bile acids increase bacterial uptake in colonic biopsies from patients with collagenous colitis in remission. *Aliment Pharmacol Ther* 2011; 33: 954–960.

## Supplementary material – Appendix D

### Figures

#### PICO 03: How frequent is MC in patients with chronic diarrhea and normal or near normal colonoscopy?

**Figure 1:** Pooled frequency of MC in patients with chronic watery diarrhea. An  $I^2$  value (statistical heterogeneity) of 93.6% indicates a high variability in intra-study differences in the overall effect size.

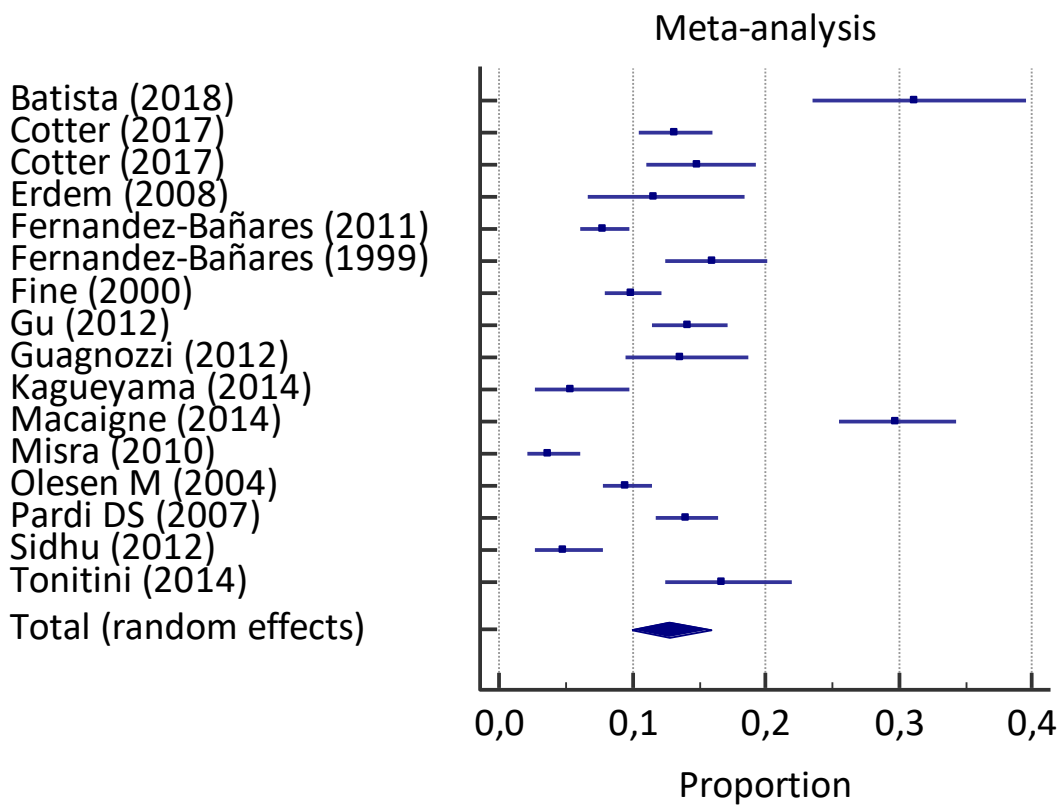

**Figure 2.** Pooled frequency of CC in patients with chronic watery diarrhea. An  $I^2$  value (statistical heterogeneity) of 85.2% indicates a high variability in intra-study differences in the overall effect size.

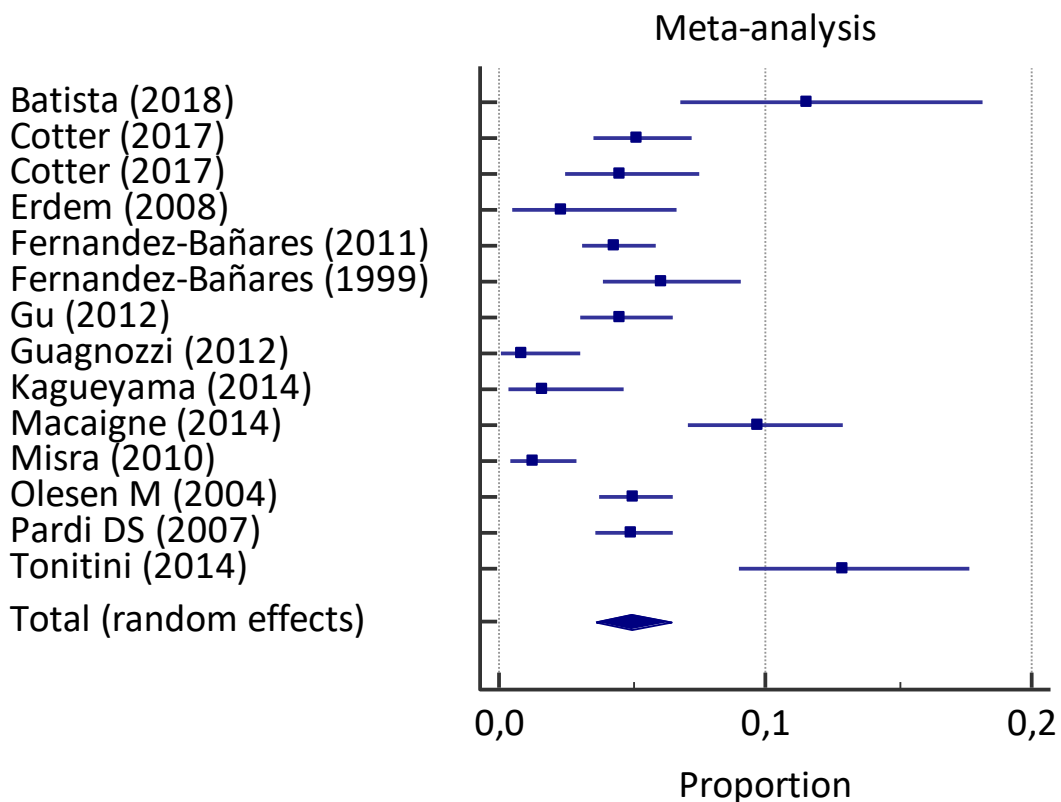

**Figure 3.** Pooled frequency of LC in patients with chronic watery diarrhea. An  $I^2$  value (statistical heterogeneity) of 92.0% indicates a high variability in intra-study differences in the overall effect size.

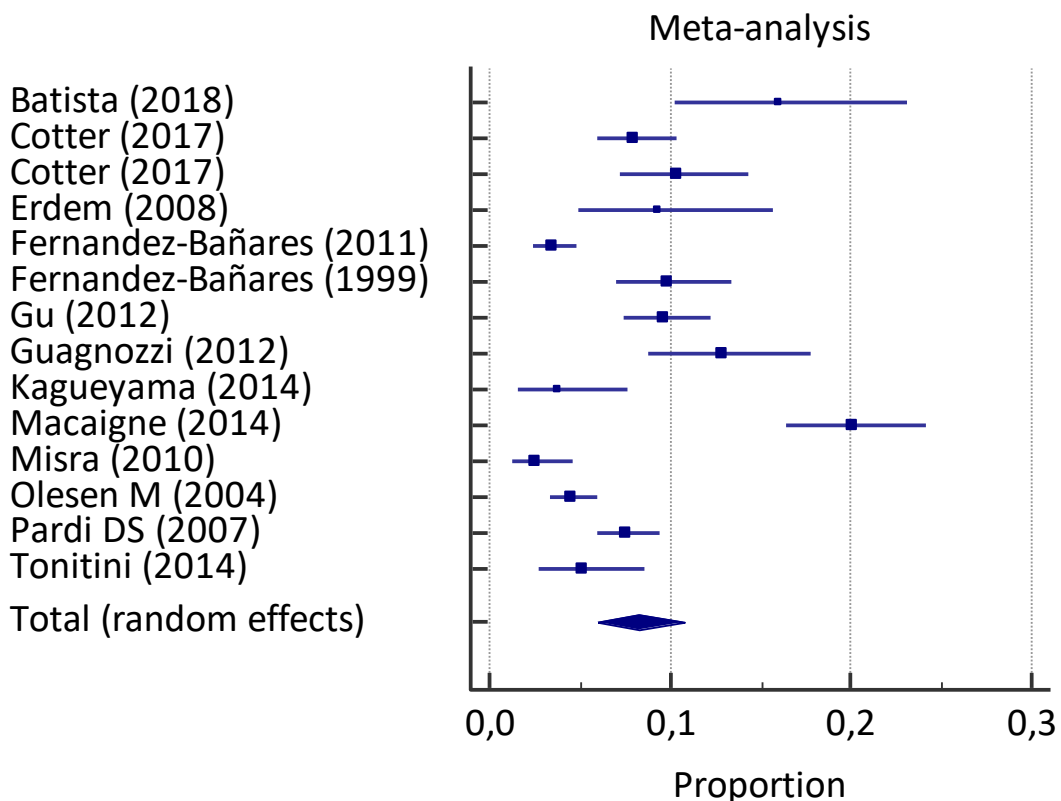

## PICO 05: Is female gender a risk factor for MC?

**Figure 1.** Pooled odds ratio of female incidence rate compared to male incidence rate for MC. An  $I^2$  value (statistical heterogeneity) of 89% indicates a high variability in intra-study differences in the overall effect size.

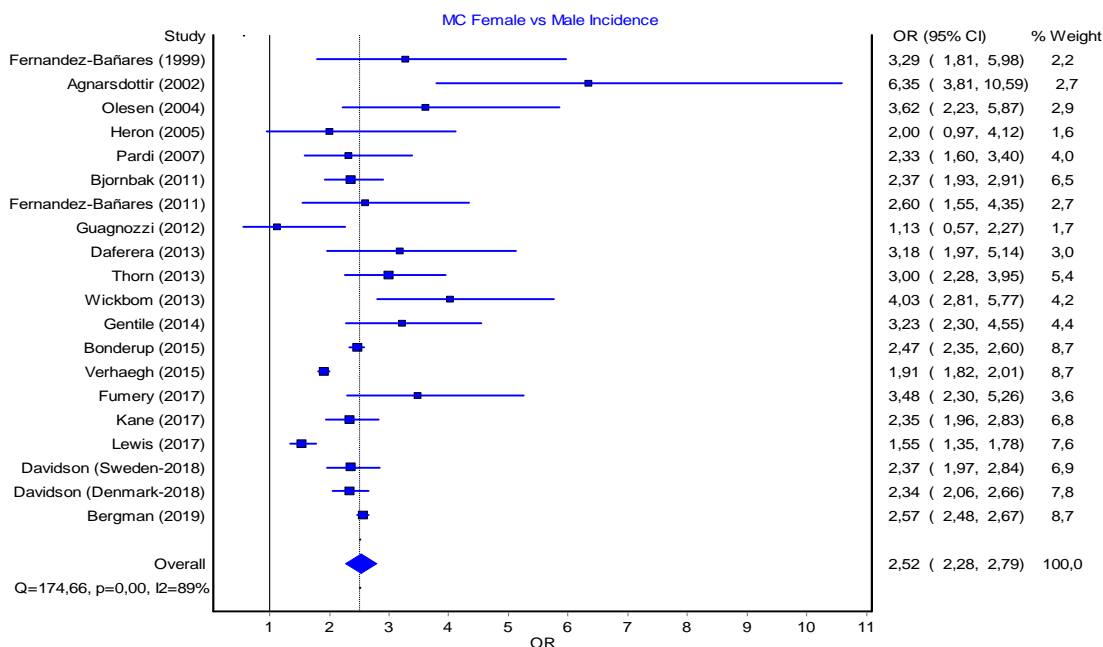

**Figure 2a.** Pooled odds ratio of female incidence rate compared to male incidence rate for CC. An  $I^2$  value (statistical heterogeneity) of 35% indicates a moderate variability in intra-study differences in the overall effect size.

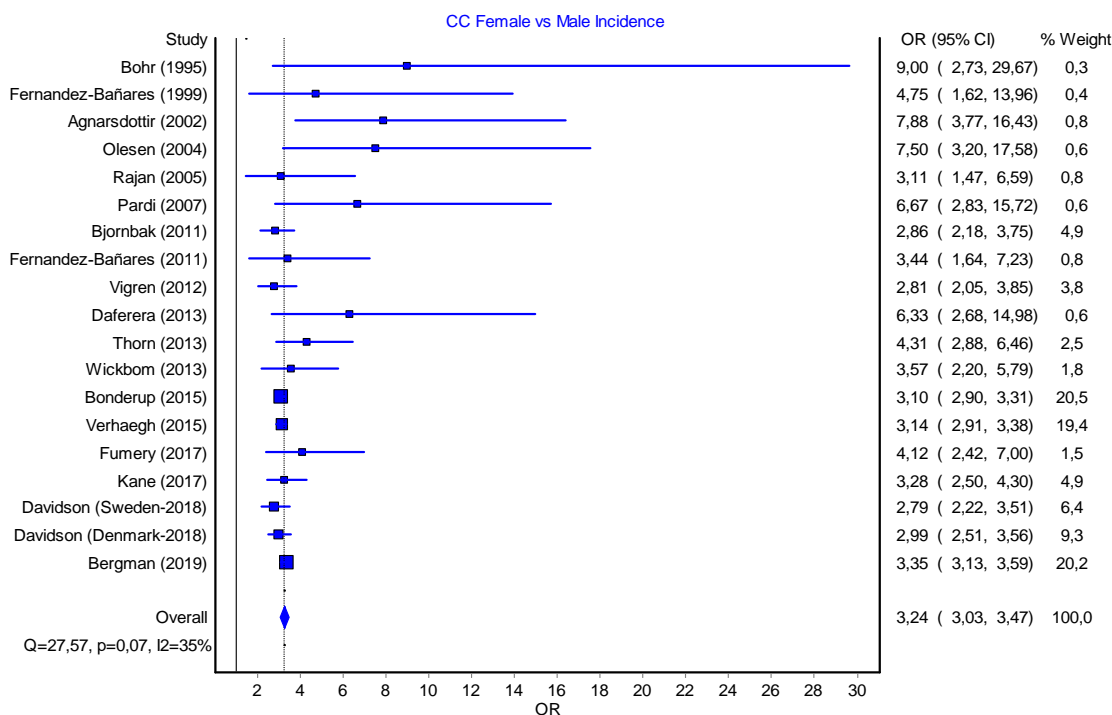

**Figure 2b.** Pooled odds ratio of female incidence rate compared to male incidence rate for LC. An  $I^2$  value (statistical heterogeneity) of 78% indicates a high variability in intra-study differences in the overall effect size.

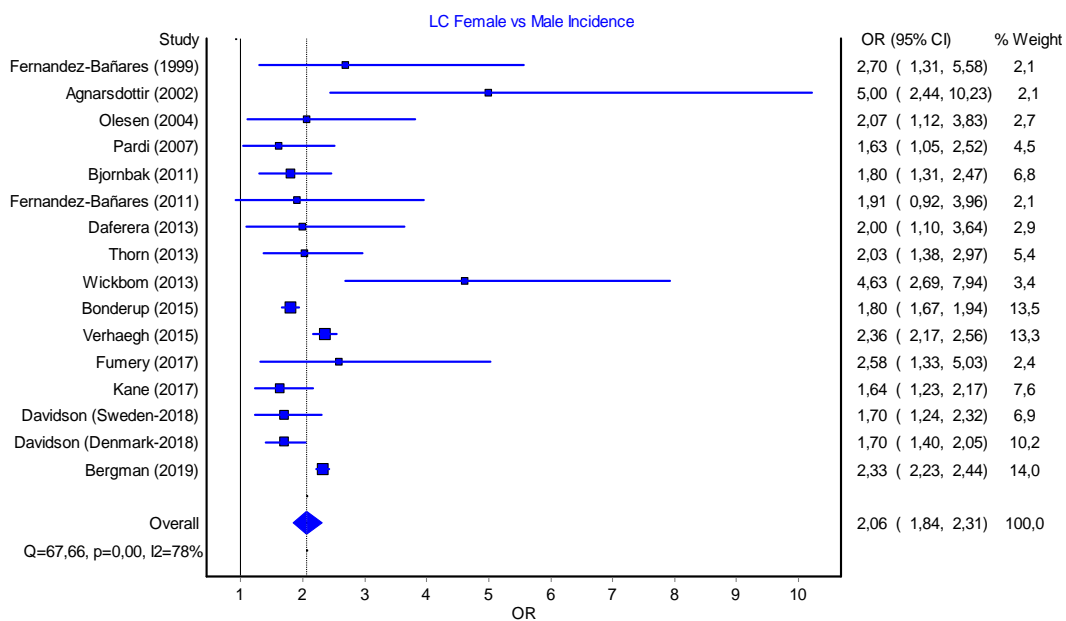

## PICO 06: In MC patients does smoking cessation influence the disease course?

**Figures 1.** Summary estimates for smoking status as a risk factor for MC (Figure 1A), CC (Figure 1B) and LC (Figure 1C), expressed as Odds Ratio (OR) between current smokers vs former smokers. An  $I^2$  value (statistical heterogeneity) >75% indicates a high variability.

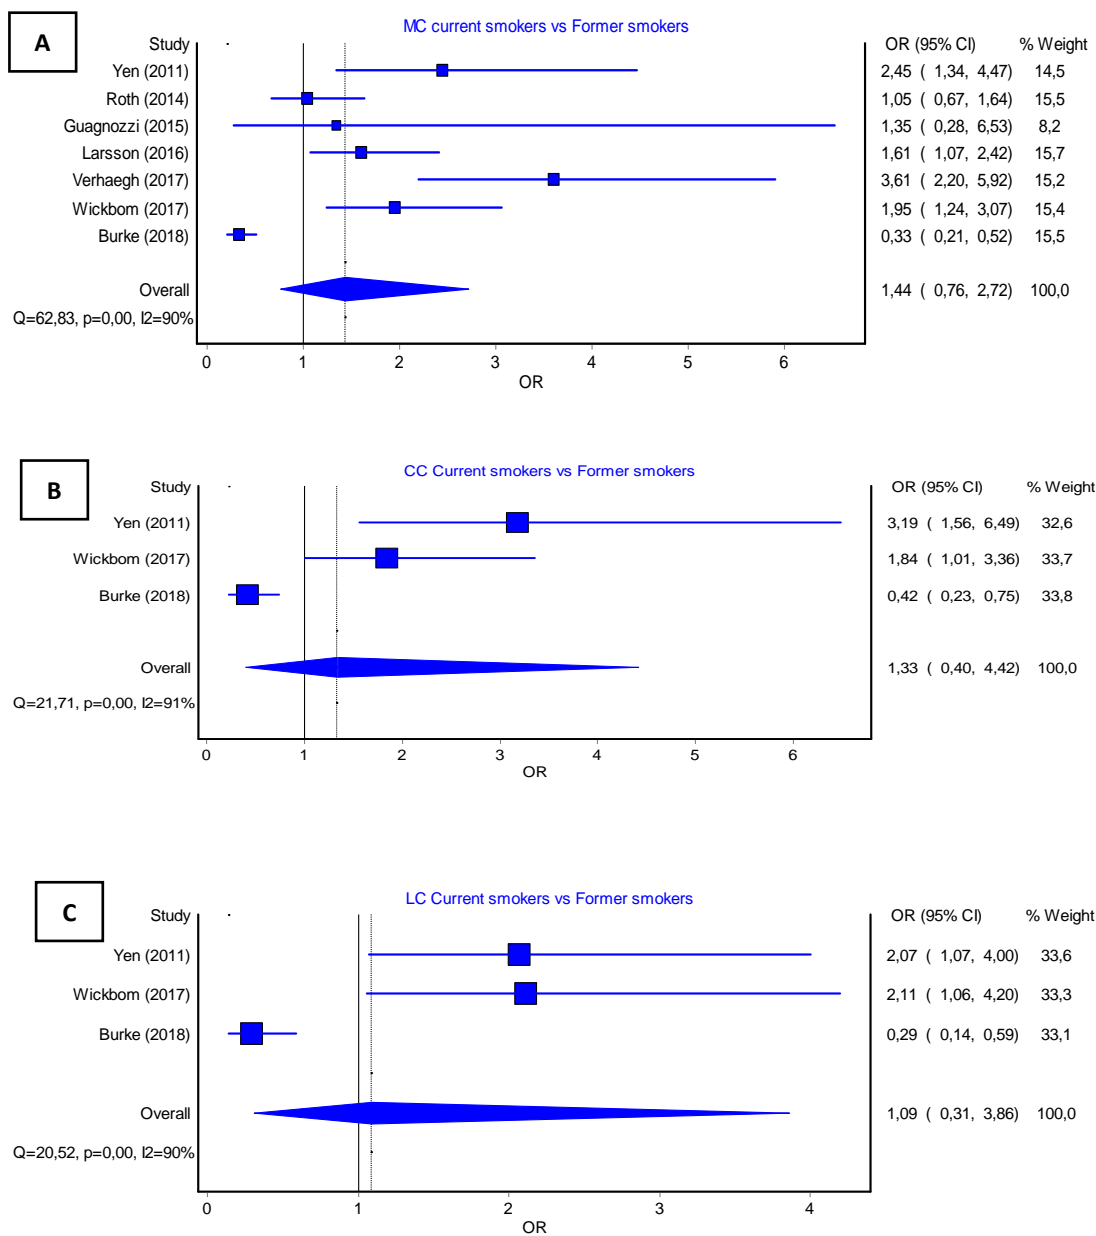

## PICO 07: Is drug use associated with a significant increased risk of MC?

**Figure 1.** Pooled odds ratio of PPIs exposure in MC patients. An  $I^2$  value (statistical heterogeneity) of 99% indicates a high variability in intra-study differences in the overall effect size.

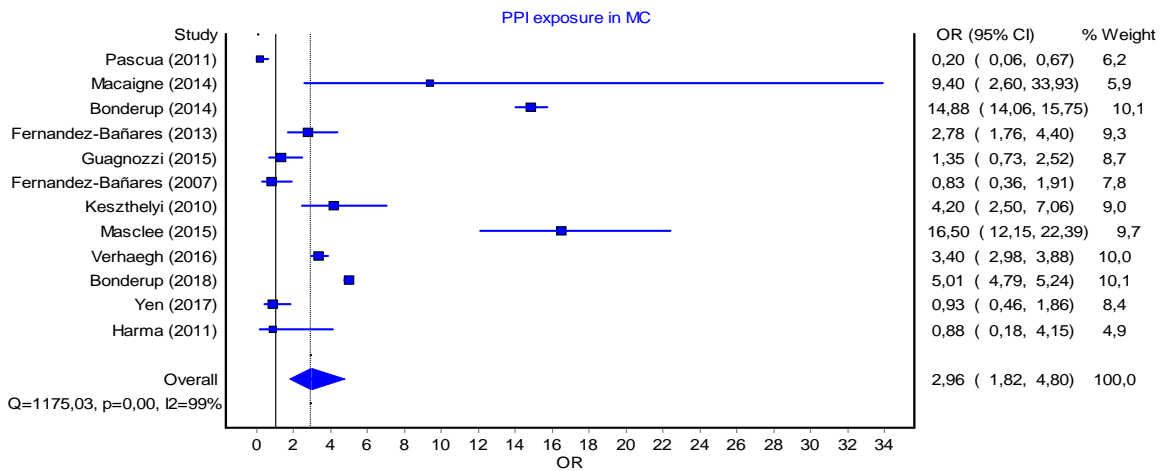

**Figure 2.** Pooled odds ratio of NSAIDs (excluding aspirin intake) (Figure 2A) and low-dosis aspirin intake (<300 mg) alone (Figure 2B) in MC patients. An  $I^2$  value (statistical heterogeneity) of 88% indicates a high variability in intra-study differences in the overall effect size.

A

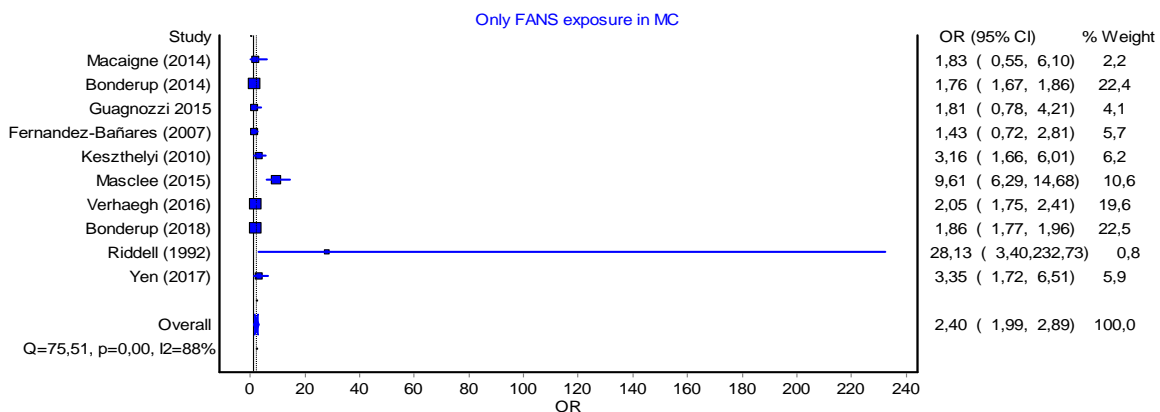

B

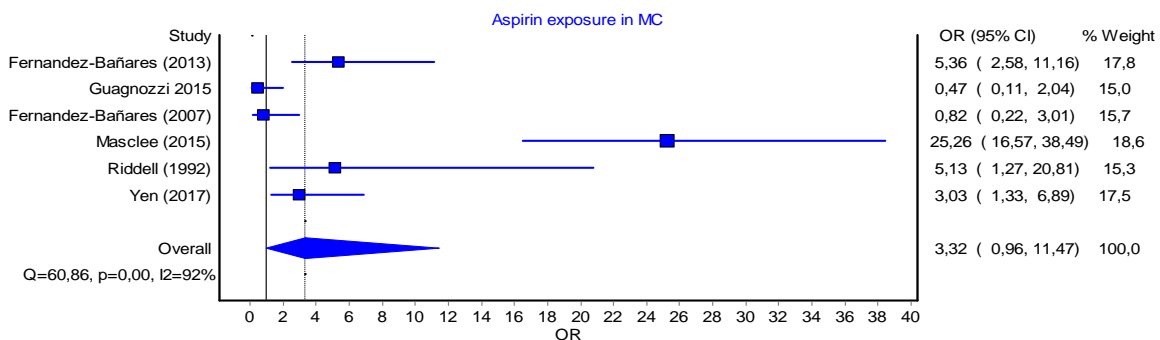

**Figure 3.** Pooled odds ratio of SSRI exposure in MC patients. An  $I^2$  value (statistical heterogeneity) of 91% indicates a high variability in intra-study differences in the overall effect size.

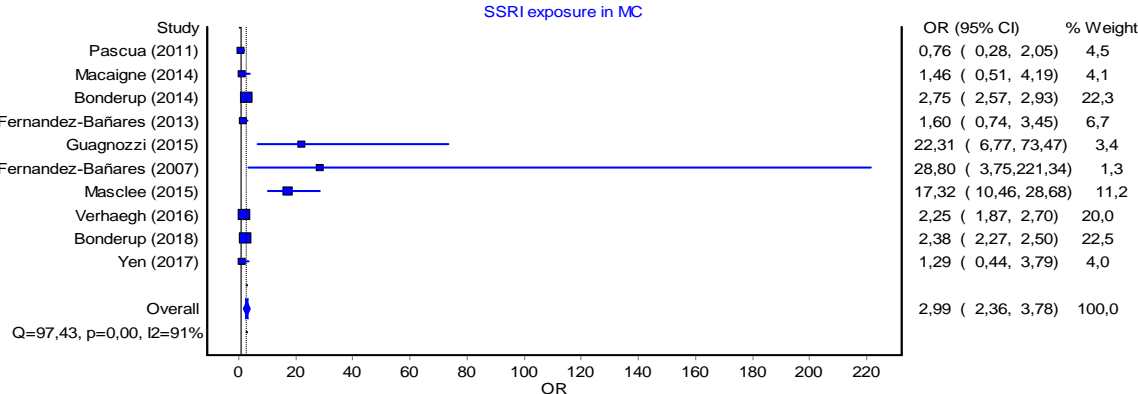



# PICO 09: Do MC patients require a special program for colonoscopy surveillance to rule out CRC compared to general population?

Figure 1. Summary estimates for colonic adenoma (A) and colorectal cancer (B) risk in MC patients expressed as Odds Ratio (OR) between MC and controls. An  $I^2$  value (statistical heterogeneity)  $>75\%$  indicates a high variability.

A:

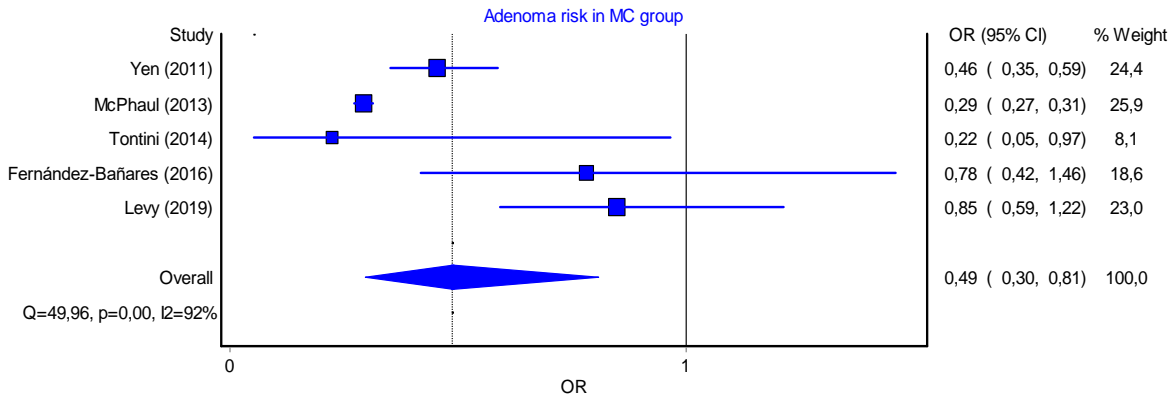

B:

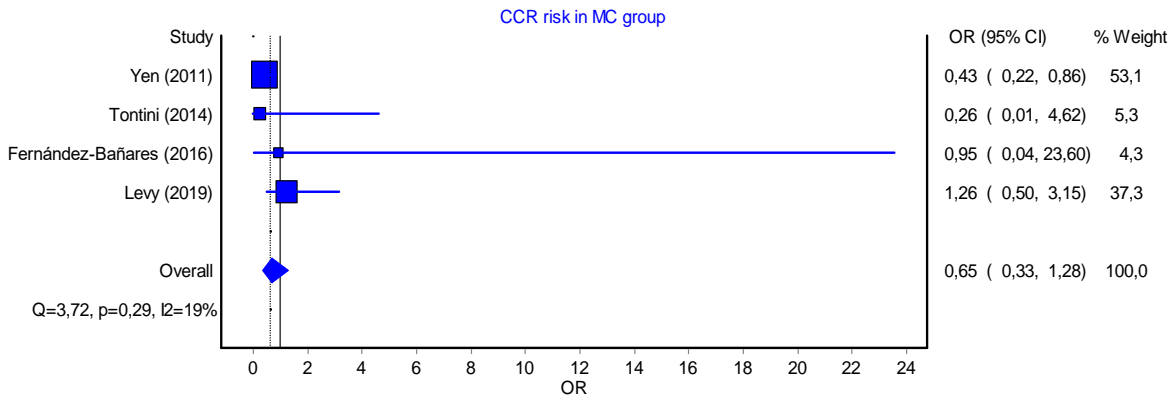

## Workgroup 5:

**Figure 1.** Meta-analysis of trials comparing the efficacy of oral budesonide *versus* placebo in inducing clinical response in patients with collagenous colitis.

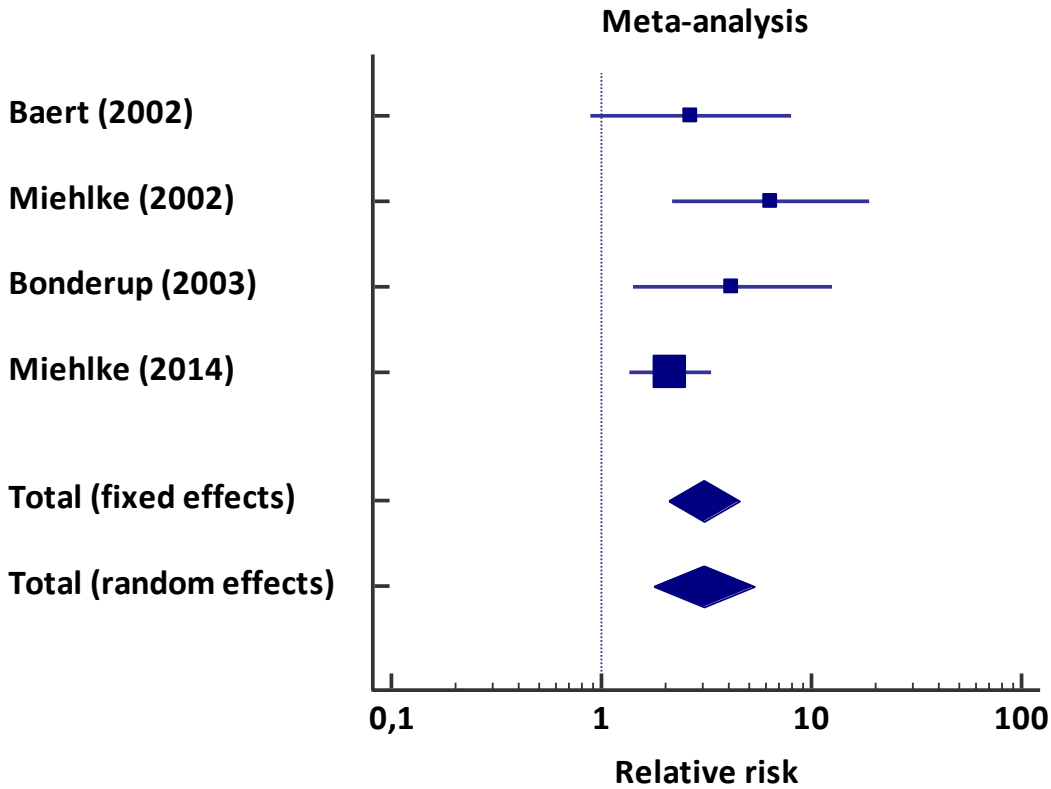

**Figure 2.** Meta-analysis of trials that comparing the efficacy of oral budesonide *versus* placebo in inducing clinical response in patients with lymphocytic colitis.

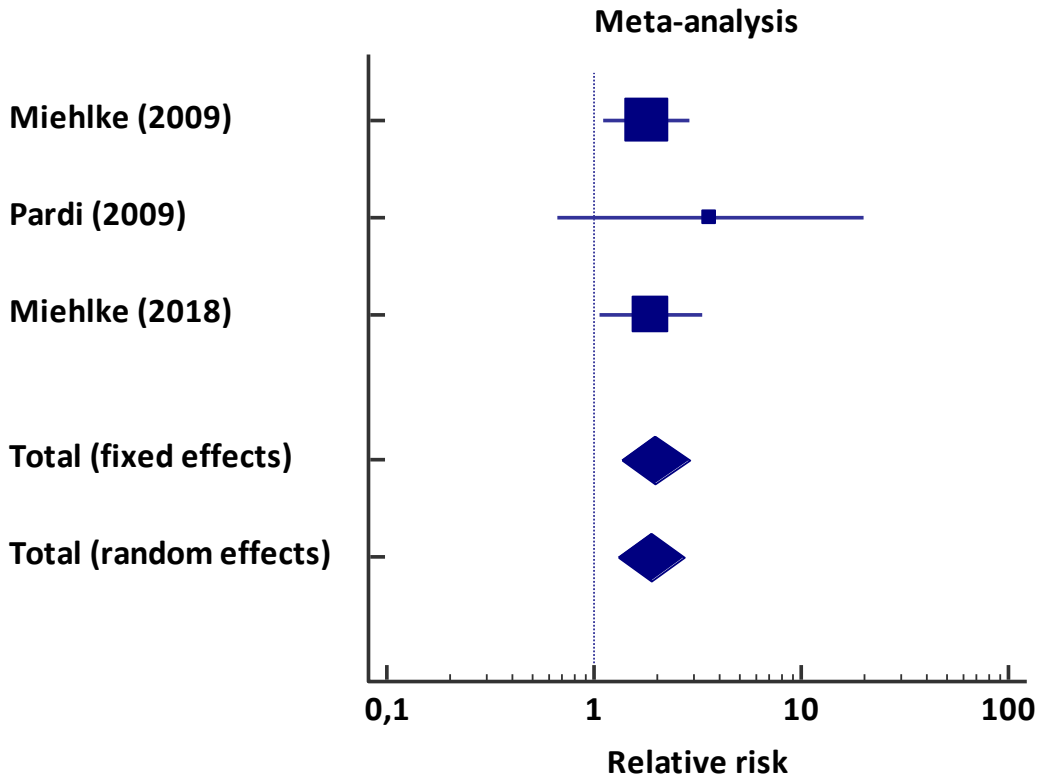

Supplement: UEG2-9-13-s001.pdf [file UEG2-9-13-s001.pdf]
